# Supplementary material
Source: publisher figshare collection journal article supplement (https://acs.figshare.com/ndownloader/files/4629811)
Supplement: Supplementary file 1 [file 4629811]

HEADER    ----                                    XX-XXX-XX   xxxx              
COMPND    ---                                                                   
REMARK   3
REMARK   3 REFINEMENT.
REMARK   3   PROGRAM     : REFMAC 5.2.0003
REMARK   3   AUTHORS     : MURSHUDOV,VAGIN,DODSON
REMARK   3
REMARK   3    REFINEMENT TARGET : MAXIMUM LIKELIHOOD
REMARK   3
REMARK   3  DATA USED IN REFINEMENT.
REMARK   3   RESOLUTION RANGE HIGH (ANGSTROMS) :   1.80
REMARK   3   RESOLUTION RANGE LOW  (ANGSTROMS) :  29.71
REMARK   3   DATA CUTOFF            (SIGMA(F)) : NONE
REMARK   3   COMPLETENESS FOR RANGE        (%) :  95.58
REMARK   3   NUMBER OF REFLECTIONS             :   53665
REMARK   3
REMARK   3  FIT TO DATA USED IN REFINEMENT.
REMARK   3   CROSS-VALIDATION METHOD          : THROUGHOUT
REMARK   3   FREE R VALUE TEST SET SELECTION  : RANDOM
REMARK   3   R VALUE     (WORKING + TEST SET) : 0.18776
REMARK   3   R VALUE            (WORKING SET) :  0.18575
REMARK   3   FREE R VALUE                     :  0.22471
REMARK   3   FREE R VALUE TEST SET SIZE   (%) :  5.1
REMARK   3   FREE R VALUE TEST SET COUNT      :  2896
REMARK   3
REMARK   3  FIT IN THE HIGHEST RESOLUTION BIN.
REMARK   3   TOTAL NUMBER OF BINS USED           :      20
REMARK   3   BIN RESOLUTION RANGE HIGH           :    1.795
REMARK   3   BIN RESOLUTION RANGE LOW            :    1.842
REMARK   3   REFLECTION IN BIN     (WORKING SET) :     2972
REMARK   3   BIN COMPLETENESS (WORKING+TEST) (%) :    72.20
REMARK   3   BIN R VALUE           (WORKING SET) :    0.262
REMARK   3   BIN FREE R VALUE SET COUNT          :      139
REMARK   3   BIN FREE R VALUE                    :    0.297
REMARK   3
REMARK   3  NUMBER OF NON-HYDROGEN ATOMS USED IN REFINEMENT.
REMARK   3   ALL ATOMS                :     5068
REMARK   3
REMARK   3  B VALUES.
REMARK   3   FROM WILSON PLOT           (A**2) : NULL
REMARK   3   MEAN B VALUE      (OVERALL, A**2) :  29.597
REMARK   3   OVERALL ANISOTROPIC B VALUE.
REMARK   3    B11 (A**2) :     0.07
REMARK   3    B22 (A**2) :    -0.03
REMARK   3    B33 (A**2) :    -0.04
REMARK   3    B12 (A**2) :     0.00
REMARK   3    B13 (A**2) :     0.00
REMARK   3    B23 (A**2) :     0.00
REMARK   3
REMARK   3  ESTIMATED OVERALL COORDINATE ERROR.
REMARK   3   ESU BASED ON R VALUE                            (A):   0.134
REMARK   3   ESU BASED ON FREE R VALUE                       (A):   0.128
REMARK   3   ESU BASED ON MAXIMUM LIKELIHOOD                 (A):   0.083
REMARK   3   ESU FOR B VALUES BASED ON MAXIMUM LIKELIHOOD (A**2):   2.603
REMARK   3
REMARK   3 CORRELATION COEFFICIENTS.
REMARK   3   CORRELATION COEFFICIENT FO-FC      :   0.959
REMARK   3   CORRELATION COEFFICIENT FO-FC FREE :   0.940
REMARK   3
REMARK   3  RMS DEVIATIONS FROM IDEAL VALUES        COUNT    RMS    WEIGHT
REMARK   3   BOND LENGTHS REFINED ATOMS        (A):  4729 ; 0.015 ; 0.022
REMARK   3   BOND ANGLES REFINED ATOMS   (DEGREES):  6458 ; 1.639 ; 1.997
REMARK   3   TORSION ANGLES, PERIOD 1    (DEGREES):   594 ; 6.765 ; 5.000
REMARK   3   TORSION ANGLES, PERIOD 2    (DEGREES):   214 ;35.640 ;24.486
REMARK   3   TORSION ANGLES, PERIOD 3    (DEGREES):   816 ;15.133 ;15.000
REMARK   3   TORSION ANGLES, PERIOD 4    (DEGREES):    28 ;16.479 ;15.000
REMARK   3   CHIRAL-CENTER RESTRAINTS       (A**3):   723 ; 0.116 ; 0.200
REMARK   3   GENERAL PLANES REFINED ATOMS      (A):  3533 ; 0.006 ; 0.020
REMARK   3   NON-BONDED CONTACTS REFINED ATOMS (A):  2487 ; 0.220 ; 0.200
REMARK   3   NON-BONDED TORSION REFINED ATOMS  (A):  3216 ; 0.308 ; 0.200
REMARK   3   H-BOND (X...Y) REFINED ATOMS      (A):   419 ; 0.152 ; 0.200
REMARK   3   SYMMETRY VDW REFINED ATOMS        (A):    82 ; 0.262 ; 0.200
REMARK   3   SYMMETRY H-BOND REFINED ATOMS     (A):    39 ; 0.135 ; 0.200
REMARK   3
REMARK   3  ISOTROPIC THERMAL FACTOR RESTRAINTS.     COUNT   RMS    WEIGHT
REMARK   3   MAIN-CHAIN BOND REFINED ATOMS  (A**2):  2849 ; 0.940 ; 1.500
REMARK   3   MAIN-CHAIN ANGLE REFINED ATOMS (A**2):  4505 ; 1.512 ; 2.000
REMARK   3   SIDE-CHAIN BOND REFINED ATOMS  (A**2):  2180 ; 2.167 ; 3.000
REMARK   3   SIDE-CHAIN ANGLE REFINED ATOMS (A**2):  1922 ; 3.195 ; 4.500
REMARK   3
REMARK   3  NCS RESTRAINTS STATISTICS
REMARK   3   NUMBER OF NCS GROUPS : NULL
REMARK   3
REMARK   3
REMARK   3  TLS DETAILS
REMARK   3   NUMBER OF TLS GROUPS  : NULL
REMARK   3
REMARK   3
REMARK   3  BULK SOLVENT MODELLING.
REMARK   3   METHOD USED :  MASK
REMARK   3   PARAMETERS FOR MASK CALCULATION
REMARK   3   VDW PROBE RADIUS   :   1.20
REMARK   3   ION PROBE RADIUS   :   0.80
REMARK   3   SHRINKAGE RADIUS   :   0.80
REMARK   3
REMARK   3  OTHER REFINEMENT REMARKS:
REMARK   3  HYDROGENS HAVE BEEN ADDED IN THE RIDING POSITIONS
REMARK   3
CISPEP   1 LEU A  171    SER A  172                    0.00
CISPEP   2 TRP A  268    PRO A  269                    0.00
CISPEP   3 LEU A  282    GLN A  283                    0.00
CISPEP   4 TYR A  307    PRO A  308                    0.00
CISPEP   5 ASN A  438    ALA A  439                    0.00
CISPEP   6 ASN A  471    ALA A  472                    0.00
CISPEP   7 ALA A  472    ALA A  473                    0.00
CISPEP   8 ALA A  473    ASN A  474                    0.00
CISPEP   9 ASN A  474    ALA A  475                    0.00
CISPEP  10 PHE A  495    ALA A  496                    0.00
CISPEP  11 TYR A  499    GLY A  500                    0.00
CISPEP  12 PRO A  529    SER A  530                    0.00
CISPEP  13 ALA A  531    ALA A  532                    0.00
CRYST1   67.633   85.907  107.469  90.00  90.00  90.00 P 21 21 21               
SCALE1      0.014786  0.000000  0.000000        0.00000                         
SCALE2      0.000000  0.011640  0.000000        0.00000                         
SCALE3      0.000000  0.000000  0.009305        0.00000                         
ATOM      1  N   ALA A   5      48.444  29.615  14.233  1.00 43.89           N
ATOM      2  CA  ALA A   5      47.039  29.627  14.748  1.00 43.33           C
ATOM      3  CB  ALA A   5      46.071  29.955  13.615  1.00 43.89           C
ATOM      4  C   ALA A   5      46.631  28.320  15.466  1.00 42.54           C
ATOM      5  O   ALA A   5      45.672  27.646  15.072  1.00 42.30           O
ATOM      6  N   VAL A   6      47.376  27.962  16.513  1.00 41.02           N
ATOM      7  CA  VAL A   6      46.880  26.982  17.471  1.00 39.20           C
ATOM      8  CB  VAL A   6      47.999  26.182  18.166  1.00 39.67           C
ATOM      9  CG1 VAL A   6      47.383  24.995  18.939  1.00 41.10           C
ATOM     10  CG2 VAL A   6      49.071  25.722  17.143  1.00 40.31           C
ATOM     11  C   VAL A   6      46.072  27.714  18.542  1.00 36.59           C
ATOM     12  O   VAL A   6      46.633  28.461  19.359  1.00 37.47           O
ATOM     13  N   PHE A   7      44.764  27.471  18.549  1.00 33.19           N
ATOM     14  CA  PHE A   7      43.885  27.964  19.604  1.00 29.87           C
ATOM     15  CB  PHE A   7      42.730  28.751  18.987  1.00 28.62           C
ATOM     16  CG  PHE A   7      43.144  30.078  18.425  1.00 28.36           C
ATOM     17  CD1 PHE A   7      43.488  30.200  17.072  1.00 27.83           C
ATOM     18  CE1 PHE A   7      43.855  31.411  16.546  1.00 27.16           C
ATOM     19  CZ  PHE A   7      43.881  32.537  17.347  1.00 27.01           C
ATOM     20  CE2 PHE A   7      43.528  32.447  18.698  1.00 25.95           C
ATOM     21  CD2 PHE A   7      43.169  31.212  19.232  1.00 27.86           C
ATOM     22  C   PHE A   7      43.356  26.786  20.422  1.00 27.96           C
ATOM     23  O   PHE A   7      42.579  26.007  19.920  1.00 27.81           O
ATOM     24  N   GLY A   8      43.807  26.646  21.663  1.00 26.59           N
ATOM     25  CA  GLY A   8      43.323  25.541  22.516  1.00 26.39           C
ATOM     26  C   GLY A   8      44.253  24.336  22.535  1.00 25.41           C
ATOM     27  O   GLY A   8      45.354  24.360  21.989  1.00 27.14           O
ATOM     28  N   ILE A   9      43.796  23.269  23.142  1.00 24.05           N
ATOM     29  CA  ILE A   9      44.685  22.156  23.483  1.00 23.25           C
ATOM     30  CB  ILE A   9      44.369  21.684  24.924  1.00 22.76           C
ATOM     31  CG1 ILE A   9      42.984  21.051  25.017  1.00 21.31           C
ATOM     32  CD1 ILE A   9      42.677  20.434  26.389  1.00 23.32           C
ATOM     33  CG2 ILE A   9      44.567  22.833  25.941  1.00 23.21           C
ATOM     34  C   ILE A   9      44.655  21.005  22.474  1.00 23.11           C
ATOM     35  O   ILE A   9      45.324  19.970  22.653  1.00 23.48           O
ATOM     36  N   THR A  10      43.869  21.162  21.414  1.00 21.53           N
ATOM     37  CA  THR A  10      43.883  20.176  20.321  1.00 21.56           C
ATOM     38  CB  THR A  10      42.613  19.302  20.321  1.00 20.99           C
ATOM     39  OG1 THR A  10      41.475  20.149  20.097  1.00 21.09           O
ATOM     40  CG2 THR A  10      42.353  18.586  21.640  1.00 22.65           C
ATOM     41  C   THR A  10      43.873  20.956  19.021  1.00 21.06           C
ATOM     42  O   THR A  10      43.650  22.169  19.011  1.00 21.48           O
ATOM     43  N   GLY A  11      44.051  20.264  17.904  1.00 21.12           N
ATOM     44  CA  GLY A  11      43.788  20.895  16.618  1.00 20.59           C
ATOM     45  C   GLY A  11      42.283  21.044  16.418  1.00 19.97           C
ATOM     46  O   GLY A  11      41.474  20.583  17.245  1.00 19.81           O
ATOM     47  N   PRO A  12      41.892  21.669  15.315  1.00 20.14           N
ATOM     48  CA  PRO A  12      40.476  21.870  15.027  1.00 19.88           C
ATOM     49  CB  PRO A  12      40.503  22.839  13.846  1.00 19.49           C
ATOM     50  CG  PRO A  12      41.778  22.452  13.109  1.00 22.68           C
ATOM     51  CD  PRO A  12      42.756  22.211  14.240  1.00 20.46           C
ATOM     52  C   PRO A  12      39.765  20.576  14.620  1.00 20.03           C
ATOM     53  O   PRO A  12      40.393  19.655  14.085  1.00 20.03           O
ATOM     54  N   VAL A  13      38.476  20.502  14.902  1.00 18.33           N
ATOM     55  CA  VAL A  13      37.628  19.468  14.278  1.00 18.23           C
ATOM     56  CB  VAL A  13      36.247  19.362  14.949  1.00 17.40           C
ATOM     57  CG1 VAL A  13      35.268  18.418  14.134  1.00 17.09           C
ATOM     58  CG2 VAL A  13      36.402  18.903  16.398  1.00 17.04           C
ATOM     59  C   VAL A  13      37.508  19.705  12.774  1.00 17.86           C
ATOM     60  O   VAL A  13      37.607  18.760  11.989  1.00 18.07           O
ATOM     61  N   SER A  14      37.319  20.967  12.368  1.00 18.00           N
ATOM     62  CA  SER A  14      37.179  21.287  10.939  1.00 18.93           C
ATOM     63  CB  SER A  14      35.719  21.100  10.499  1.00 19.35           C
ATOM     64  OG  SER A  14      35.526  21.604   9.173  1.00 21.58           O
ATOM     65  C   SER A  14      37.633  22.702  10.644  1.00 19.23           C
ATOM     66  O   SER A  14      37.312  23.628  11.403  1.00 17.69           O
ATOM     67  N   THR A  15      38.396  22.885   9.554  1.00 19.27           N
ATOM     68  CA  THR A  15      38.801  24.241   9.142  1.00 19.44           C
ATOM     69  CB  THR A  15      40.302  24.294   8.727  1.00 19.55           C
ATOM     70  OG1 THR A  15      40.558  23.279   7.738  1.00 22.05           O
ATOM     71  CG2 THR A  15      41.219  23.943   9.905  1.00 22.23           C
ATOM     72  C   THR A  15      37.932  24.731   7.977  1.00 19.50           C
ATOM     73  O   THR A  15      38.205  25.795   7.405  1.00 19.29           O
ATOM     74  N   VAL A  16      36.900  23.968   7.632  1.00 19.22           N
ATOM     75  CA  VAL A  16      35.980  24.351   6.526  1.00 20.52           C
ATOM     76  CB  VAL A  16      34.946  23.236   6.241  1.00 20.45           C
ATOM     77  CG1 VAL A  16      33.990  23.618   5.072  1.00 20.10           C
ATOM     78  CG2 VAL A  16      35.654  21.911   5.903  1.00 19.19           C
ATOM     79  C   VAL A  16      35.300  25.689   6.864  1.00 21.01           C
ATOM     80  O   VAL A  16      34.853  25.895   8.009  1.00 20.66           O
ATOM     81  N   GLY A  17      35.219  26.598   5.885  1.00 21.67           N
ATOM     82  CA  GLY A  17      34.557  27.898   6.093  1.00 20.87           C
ATOM     83  C   GLY A  17      33.083  27.876   5.751  1.00 21.24           C
ATOM     84  O   GLY A  17      32.557  26.876   5.280  1.00 21.02           O
ATOM     85  N   ALA A  18      32.409  29.013   5.973  1.00 20.17           N
ATOM     86  CA  ALA A  18      30.970  29.070   5.883  1.00 19.78           C
ATOM     87  CB  ALA A  18      30.434  30.332   6.631  1.00 19.06           C
ATOM     88  C   ALA A  18      30.535  29.126   4.415  1.00 20.17           C
ATOM     89  O   ALA A  18      31.194  29.780   3.585  1.00 21.22           O
ATOM     90  N   THR A  19      29.423  28.486   4.123  1.00 20.41           N
ATOM     91  CA  THR A  19      28.866  28.525   2.773  1.00 20.34           C
ATOM     92  CB  THR A  19      28.090  27.267   2.450  1.00 20.73           C
ATOM     93  OG1 THR A  19      26.992  27.114   3.369  1.00 21.08           O
ATOM     94  CG2 THR A  19      28.968  26.009   2.569  1.00 20.74           C
ATOM     95  C   THR A  19      27.917  29.719   2.678  1.00 20.56           C
ATOM     96  O   THR A  19      27.558  30.315   3.710  1.00 18.77           O
ATOM     97  N   ALA A  20      27.473  30.028   1.452  1.00 20.65           N
ATOM     98  CA  ALA A  20      26.447  31.054   1.257  1.00 21.45           C
ATOM     99  CB  ALA A  20      26.030  31.136  -0.228  1.00 21.67           C
ATOM    100  C   ALA A  20      25.215  30.773   2.125  1.00 21.01           C
ATOM    101  O   ALA A  20      24.681  31.683   2.753  1.00 21.14           O
ATOM    102  N   ALA A  21      24.733  29.529   2.113  1.00 20.87           N
ATOM    103  CA  ALA A  21      23.528  29.187   2.871  1.00 20.37           C
ATOM    104  CB  ALA A  21      23.058  27.758   2.566  1.00 21.26           C
ATOM    105  C   ALA A  21      23.714  29.372   4.383  1.00 19.94           C
ATOM    106  O   ALA A  21      22.793  29.810   5.083  1.00 19.51           O
ATOM    107  N   GLU A  22      24.888  29.010   4.876  1.00 19.44           N
ATOM    108  CA  GLU A  22      25.174  29.143   6.301  1.00 19.66           C
ATOM    109  CB  GLU A  22      26.437  28.374   6.643  1.00 20.58           C
ATOM    110  CG  GLU A  22      26.252  26.862   6.558  1.00 18.99           C
ATOM    111  CD  GLU A  22      27.564  26.099   6.618  1.00 21.73           C
ATOM    112  OE1 GLU A  22      27.489  24.856   6.817  1.00 24.12           O
ATOM    113  OE2 GLU A  22      28.654  26.708   6.473  1.00 21.01           O
ATOM    114  C   GLU A  22      25.279  30.648   6.684  1.00 19.28           C
ATOM    115  O   GLU A  22      24.733  31.091   7.730  1.00 17.76           O
ATOM    116  N   ASN A  23      25.959  31.424   5.838  1.00 19.16           N
ATOM    117  CA  ASN A  23      26.091  32.871   6.069  1.00 19.28           C
ATOM    118  CB  ASN A  23      27.063  33.500   5.069  1.00 18.71           C
ATOM    119  CG  ASN A  23      28.523  33.307   5.443  1.00 21.49           C
ATOM    120  OD1 ASN A  23      28.924  33.366   6.637  1.00 21.73           O
ATOM    121  ND2 ASN A  23      29.356  33.130   4.417  1.00 20.70           N
ATOM    122  C   ASN A  23      24.744  33.617   6.069  1.00 20.29           C
ATOM    123  O   ASN A  23      24.549  34.588   6.842  1.00 19.77           O
ATOM    124  N   LYS A  24      23.801  33.145   5.238  1.00 20.42           N
ATOM    125  CA  LYS A  24      22.439  33.643   5.232  1.00 21.75           C
ATOM    126  CB  LYS A  24      21.655  33.023   4.051  1.00 21.50           C
ATOM    127  CG  LYS A  24      20.253  33.609   3.883  1.00 23.63           C
ATOM    128  CD  LYS A  24      19.552  32.929   2.687  1.00 26.55           C
ATOM    129  CE  LYS A  24      18.192  33.545   2.379  1.00 34.14           C
ATOM    130  NZ  LYS A  24      18.292  34.988   2.004  1.00 37.61           N
ATOM    131  C   LYS A  24      21.746  33.368   6.581  1.00 21.57           C
ATOM    132  O   LYS A  24      21.057  34.237   7.131  1.00 20.71           O
ATOM    133  N   LEU A  25      21.954  32.160   7.116  1.00 19.88           N
ATOM    134  CA  LEU A  25      21.393  31.790   8.396  1.00 20.06           C
ATOM    135  CB  LEU A  25      21.420  30.264   8.604  1.00 19.49           C
ATOM    136  CG  LEU A  25      20.341  29.491   7.813  1.00 20.90           C
ATOM    137  CD1 LEU A  25      20.746  28.044   7.640  1.00 21.48           C
ATOM    138  CD2 LEU A  25      18.968  29.554   8.505  1.00 20.25           C
ATOM    139  C   LEU A  25      22.089  32.548   9.535  1.00 18.85           C
ATOM    140  O   LEU A  25      21.430  32.853  10.535  1.00 19.36           O
ATOM    141  N   ASN A  26      23.364  32.912   9.324  1.00 18.36           N
ATOM    142  CA  ASN A  26      24.109  33.737  10.288  1.00 18.05           C
ATOM    143  CB  ASN A  26      25.598  33.815   9.991  1.00 18.31           C
ATOM    144  CG  ASN A  26      26.356  34.296  11.178  1.00 17.42           C
ATOM    145  OD1 ASN A  26      26.643  35.501  11.324  1.00 19.46           O
ATOM    146  ND2 ASN A  26      26.527  33.409  12.123  1.00 14.36           N
ATOM    147  C   ASN A  26      23.526  35.141  10.317  1.00 19.01           C
ATOM    148  O   ASN A  26      23.296  35.699  11.375  1.00 17.68           O
ATOM    149  N   ASP A  27      23.262  35.697   9.136  1.00 18.60           N
ATOM    150  CA  ASP A  27      22.599  37.021   9.074  1.00 19.57           C
ATOM    151  CB  ASP A  27      22.424  37.459   7.615  1.00 20.39           C
ATOM    152  CG  ASP A  27      23.722  37.896   6.966  1.00 21.19           C
ATOM    153  OD1 ASP A  27      24.689  38.268   7.686  1.00 24.46           O
ATOM    154  OD2 ASP A  27      23.870  37.926   5.719  1.00 24.51           O
ATOM    155  C   ASP A  27      21.247  37.005   9.765  1.00 19.62           C
ATOM    156  O   ASP A  27      20.899  37.938  10.516  1.00 20.40           O
ATOM    157  N   SER A  28      20.460  35.966   9.510  1.00 19.67           N
ATOM    158  CA ASER A  28      19.129  35.831  10.125  0.50 20.46           C
ATOM    159  CA BSER A  28      19.127  35.872  10.123  0.50 18.90           C
ATOM    160  CB ASER A  28      18.367  34.684   9.472  0.50 21.06           C
ATOM    161  CB BSER A  28      18.242  34.848   9.391  0.50 19.18           C
ATOM    162  OG ASER A  28      17.401  34.156  10.362  0.50 24.07           O
ATOM    163  OG BSER A  28      18.726  33.514   9.515  0.50 12.74           O
ATOM    164  C   SER A  28      19.205  35.610  11.644  1.00 20.23           C
ATOM    165  O   SER A  28      18.306  36.028  12.419  1.00 19.66           O
ATOM    166  N   LEU A  29      20.263  34.927  12.086  1.00 18.88           N
ATOM    167  CA  LEU A  29      20.474  34.731  13.518  1.00 18.56           C
ATOM    168  CB  LEU A  29      21.679  33.791  13.769  1.00 17.93           C
ATOM    169  CG  LEU A  29      22.243  33.801  15.204  1.00 18.13           C
ATOM    170  CD1 LEU A  29      21.196  33.262  16.195  1.00 18.92           C
ATOM    171  CD2 LEU A  29      23.587  32.987  15.203  1.00 17.27           C
ATOM    172  C   LEU A  29      20.695  36.090  14.181  1.00 18.51           C
ATOM    173  O   LEU A  29      20.062  36.375  15.189  1.00 19.17           O
ATOM    174  N   ILE A  30      21.582  36.899  13.613  1.00 19.31           N
ATOM    175  CA  ILE A  30      21.887  38.229  14.160  1.00 20.31           C
ATOM    176  CB  ILE A  30      22.998  38.923  13.362  1.00 20.12           C
ATOM    177  CG1 ILE A  30      24.345  38.221  13.587  1.00 20.38           C
ATOM    178  CD1 ILE A  30      25.503  38.706  12.648  1.00 20.69           C
ATOM    179  CG2 ILE A  30      23.119  40.407  13.808  1.00 20.82           C
ATOM    180  C   ILE A  30      20.611  39.072  14.223  1.00 21.34           C
ATOM    181  O   ILE A  30      20.338  39.708  15.245  1.00 20.99           O
ATOM    182  N   GLN A  31      19.802  39.024  13.159  1.00 21.45           N
ATOM    183  CA  GLN A  31      18.539  39.778  13.149  1.00 22.71           C
ATOM    184  CB  GLN A  31      17.916  39.803  11.733  1.00 23.44           C
ATOM    185  CG  GLN A  31      18.798  40.584  10.725  1.00 28.71           C
ATOM    186  CD  GLN A  31      19.227  41.991  11.241  1.00 34.37           C
ATOM    187  OE1 GLN A  31      20.417  42.247  11.514  1.00 31.21           O
ATOM    188  NE2 GLN A  31      18.244  42.879  11.409  1.00 38.21           N
ATOM    189  C   GLN A  31      17.573  39.302  14.233  1.00 21.31           C
ATOM    190  O   GLN A  31      16.921  40.123  14.882  1.00 21.16           O
ATOM    191  N   GLU A  32      17.512  37.988  14.488  1.00 21.26           N
ATOM    192  CA  GLU A  32      16.679  37.472  15.596  1.00 20.21           C
ATOM    193  CB  GLU A  32      16.583  35.941  15.569  1.00 21.12           C
ATOM    194  CG  GLU A  32      15.632  35.351  16.605  1.00 23.57           C
ATOM    195  CD  GLU A  32      14.151  35.533  16.251  1.00 30.51           C
ATOM    196  OE1 GLU A  32      13.823  35.964  15.125  1.00 31.71           O
ATOM    197  OE2 GLU A  32      13.296  35.263  17.123  1.00 32.90           O
ATOM    198  C   GLU A  32      17.229  37.947  16.962  1.00 19.58           C
ATOM    199  O   GLU A  32      16.450  38.317  17.854  1.00 19.35           O
ATOM    200  N   LEU A  33      18.548  37.921  17.135  1.00 19.25           N
ATOM    201  CA  LEU A  33      19.144  38.478  18.374  1.00 18.64           C
ATOM    202  CB  LEU A  33      20.682  38.416  18.367  1.00 19.49           C
ATOM    203  CG  LEU A  33      21.215  36.972  18.400  1.00 19.93           C
ATOM    204  CD1 LEU A  33      22.695  37.011  18.199  1.00 18.38           C
ATOM    205  CD2 LEU A  33      20.799  36.221  19.691  1.00 21.52           C
ATOM    206  C   LEU A  33      18.713  39.928  18.634  1.00 19.01           C
ATOM    207  O   LEU A  33      18.297  40.276  19.753  1.00 18.00           O
ATOM    208  N   LYS A  34      18.839  40.755  17.598  1.00 20.09           N
ATOM    209  CA  LYS A  34      18.366  42.163  17.668  1.00 21.58           C
ATOM    210  CB  LYS A  34      18.673  42.901  16.365  1.00 21.19           C
ATOM    211  CG  LYS A  34      20.163  43.127  16.119  1.00 20.64           C
ATOM    212  CD  LYS A  34      20.429  43.755  14.741  1.00 22.96           C
ATOM    213  CE  LYS A  34      21.906  43.740  14.401  1.00 25.73           C
ATOM    214  NZ  LYS A  34      22.169  44.350  13.043  1.00 26.87           N
ATOM    215  C   LYS A  34      16.881  42.262  18.069  1.00 22.51           C
ATOM    216  O   LYS A  34      16.522  42.988  19.023  1.00 22.67           O
ATOM    217  N   LYS A  35      16.032  41.513  17.365  1.00 23.39           N
ATOM    218  CA  LYS A  35      14.589  41.498  17.605  1.00 25.04           C
ATOM    219  CB  LYS A  35      13.895  40.576  16.588  1.00 26.10           C
ATOM    220  CG  LYS A  35      12.407  40.330  16.889  1.00 26.54           C
ATOM    221  CD  LYS A  35      11.691  39.608  15.731  1.00 28.59           C
ATOM    222  CE  LYS A  35      10.194  39.419  16.052  1.00 29.31           C
ATOM    223  NZ  LYS A  35       9.597  38.425  15.107  1.00 33.93           N
ATOM    224  C   LYS A  35      14.246  41.062  19.021  1.00 25.03           C
ATOM    225  O   LYS A  35      13.327  41.600  19.656  1.00 24.85           O
ATOM    226  N   GLU A  36      15.011  40.099  19.534  1.00 24.10           N
ATOM    227  CA  GLU A  36      14.814  39.576  20.882  1.00 24.61           C
ATOM    228  CB  GLU A  36      15.253  38.106  20.967  1.00 24.04           C
ATOM    229  CG  GLU A  36      14.343  37.166  20.182  1.00 29.60           C
ATOM    230  CD  GLU A  36      12.868  37.337  20.531  1.00 36.76           C
ATOM    231  OE1 GLU A  36      12.496  37.049  21.676  1.00 40.56           O
ATOM    232  OE2 GLU A  36      12.072  37.785  19.661  1.00 40.83           O
ATOM    233  C   GLU A  36      15.461  40.401  22.000  1.00 23.75           C
ATOM    234  O   GLU A  36      15.346  40.031  23.162  1.00 24.52           O
ATOM    235  N   GLY A  37      16.096  41.517  21.649  1.00 23.25           N
ATOM    236  CA  GLY A  37      16.599  42.473  22.645  1.00 23.60           C
ATOM    237  C   GLY A  37      17.932  42.052  23.243  1.00 23.43           C
ATOM    238  O   GLY A  37      18.248  42.382  24.413  1.00 23.39           O
ATOM    239  N   SER A  38      18.749  41.358  22.440  1.00 21.60           N
ATOM    240  CA  SER A  38      20.077  40.962  22.909  1.00 20.33           C
ATOM    241  CB  SER A  38      20.740  39.990  21.942  1.00 19.51           C
ATOM    242  OG  SER A  38      22.031  39.625  22.431  1.00 18.91           O
ATOM    243  C   SER A  38      20.965  42.190  23.157  1.00 19.91           C
ATOM    244  O   SER A  38      21.750  42.199  24.107  1.00 18.92           O
ATOM    245  N   PHE A  39      20.821  43.224  22.320  1.00 20.12           N
ATOM    246  CA  PHE A  39      21.712  44.397  22.335  1.00 20.56           C
ATOM    247  CB  PHE A  39      22.100  44.804  20.912  1.00 20.85           C
ATOM    248  CG  PHE A  39      22.838  43.736  20.141  1.00 21.01           C
ATOM    249  CD1 PHE A  39      22.140  42.882  19.291  1.00 22.49           C
ATOM    250  CE1 PHE A  39      22.793  41.869  18.578  1.00 24.86           C
ATOM    251  CZ  PHE A  39      24.151  41.744  18.675  1.00 23.47           C
ATOM    252  CE2 PHE A  39      24.898  42.600  19.518  1.00 22.40           C
ATOM    253  CD2 PHE A  39      24.237  43.596  20.249  1.00 22.34           C
ATOM    254  C   PHE A  39      20.991  45.573  23.001  1.00 21.07           C
ATOM    255  O   PHE A  39      19.873  45.898  22.609  1.00 20.36           O
ATOM    256  N   GLU A  40      21.632  46.207  23.981  1.00 20.19           N
ATOM    257  CA  GLU A  40      21.023  47.331  24.669  1.00 20.76           C
ATOM    258  CB  GLU A  40      21.694  47.549  26.038  1.00 20.84           C
ATOM    259  CG  GLU A  40      23.082  48.182  25.971  1.00 20.74           C
ATOM    260  CD  GLU A  40      23.786  48.161  27.322  1.00 19.22           C
ATOM    261  OE1 GLU A  40      23.190  47.631  28.293  1.00 18.70           O
ATOM    262  OE2 GLU A  40      24.941  48.658  27.414  1.00 19.80           O
ATOM    263  C   GLU A  40      21.127  48.585  23.785  1.00 22.05           C
ATOM    264  O   GLU A  40      21.868  48.600  22.790  1.00 21.69           O
ATOM    265  N   THR A  41      20.423  49.649  24.157  1.00 23.30           N
ATOM    266  CA  THR A  41      20.487  50.877  23.366  1.00 24.18           C
ATOM    267  CB  THR A  41      19.241  51.747  23.654  1.00 24.50           C
ATOM    268  OG1 THR A  41      19.292  52.206  25.011  1.00 24.94           O
ATOM    269  CG2 THR A  41      17.966  50.908  23.617  1.00 24.70           C
ATOM    270  C   THR A  41      21.731  51.695  23.691  1.00 25.03           C
ATOM    271  O   THR A  41      22.425  51.437  24.694  1.00 23.32           O
ATOM    272  N   GLU A  42      22.000  52.686  22.835  1.00 25.50           N
ATOM    273  CA AGLU A  42      23.086  53.629  23.072  0.50 25.40           C
ATOM    274  CA BGLU A  42      23.072  53.648  23.051  0.50 25.60           C
ATOM    275  CB AGLU A  42      23.176  54.667  21.953  0.50 26.51           C
ATOM    276  CB BGLU A  42      23.071  54.707  21.935  0.50 26.78           C
ATOM    277  CG AGLU A  42      24.414  54.550  21.079  0.50 27.73           C
ATOM    278  CG BGLU A  42      23.090  54.149  20.515  0.50 29.03           C
ATOM    279  CD AGLU A  42      24.203  55.173  19.704  0.50 30.59           C
ATOM    280  CD BGLU A  42      24.379  53.424  20.181  0.50 33.15           C
ATOM    281  OE1AGLU A  42      23.567  56.247  19.632  0.50 31.42           O
ATOM    282  OE1BGLU A  42      25.471  54.024  20.364  0.50 35.25           O
ATOM    283  OE2AGLU A  42      24.659  54.582  18.695  0.50 32.25           O
ATOM    284  OE2BGLU A  42      24.297  52.256  19.729  0.50 35.13           O
ATOM    285  C   GLU A  42      22.949  54.335  24.419  1.00 25.29           C
ATOM    286  O   GLU A  42      23.950  54.493  25.134  1.00 24.39           O
ATOM    287  N   GLN A  43      21.728  54.762  24.759  1.00 24.35           N
ATOM    288  CA  GLN A  43      21.445  55.417  26.047  1.00 23.65           C
ATOM    289  CB  GLN A  43      19.980  55.877  26.152  1.00 24.25           C
ATOM    290  CG  GLN A  43      19.661  56.709  27.406  1.00 26.58           C
ATOM    291  CD  GLN A  43      20.573  57.921  27.528  1.00 29.34           C
ATOM    292  OE1 GLN A  43      21.352  58.028  28.478  1.00 33.51           O
ATOM    293  NE2 GLN A  43      20.509  58.815  26.553  1.00 29.30           N
ATOM    294  C   GLN A  43      21.736  54.451  27.189  1.00 22.69           C
ATOM    295  O   GLN A  43      22.291  54.846  28.197  1.00 22.32           O
ATOM    296  N   GLU A  44      21.343  53.188  27.034  1.00 20.96           N
ATOM    297  CA  GLU A  44      21.531  52.222  28.106  1.00 21.32           C
ATOM    298  CB  GLU A  44      20.833  50.885  27.785  1.00 21.45           C
ATOM    299  CG  GLU A  44      19.356  50.939  28.150  1.00 23.59           C
ATOM    300  CD  GLU A  44      18.521  49.783  27.573  1.00 22.94           C
ATOM    301  OE1 GLU A  44      18.863  49.192  26.530  1.00 23.88           O
ATOM    302  OE2 GLU A  44      17.519  49.483  28.206  1.00 27.02           O
ATOM    303  C   GLU A  44      23.018  52.053  28.338  1.00 19.73           C
ATOM    304  O   GLU A  44      23.469  51.993  29.480  1.00 19.55           O
ATOM    305  N   THR A  45      23.794  52.016  27.255  1.00 19.46           N
ATOM    306  CA  THR A  45      25.229  51.897  27.383  1.00 18.75           C
ATOM    307  CB  THR A  45      25.877  51.653  25.994  1.00 19.43           C
ATOM    308  OG1 THR A  45      25.497  50.350  25.528  1.00 19.55           O
ATOM    309  CG2 THR A  45      27.401  51.551  26.153  1.00 21.33           C
ATOM    310  C   THR A  45      25.841  53.142  28.056  1.00 19.05           C
ATOM    311  O   THR A  45      26.697  53.035  28.952  1.00 16.85           O
ATOM    312  N   ALA A  46      25.409  54.308  27.608  1.00 18.45           N
ATOM    313  CA  ALA A  46      25.832  55.568  28.224  1.00 18.58           C
ATOM    314  CB  ALA A  46      25.174  56.735  27.498  1.00 19.27           C
ATOM    315  C   ALA A  46      25.513  55.557  29.735  1.00 17.82           C
ATOM    316  O   ALA A  46      26.334  55.985  30.563  1.00 18.00           O
ATOM    317  N   ASN A  47      24.365  54.999  30.108  1.00 17.86           N
ATOM    318  CA  ASN A  47      24.003  54.942  31.522  1.00 17.96           C
ATOM    319  CB  ASN A  47      22.575  54.424  31.703  1.00 18.63           C
ATOM    320  CG  ASN A  47      21.534  55.405  31.204  1.00 21.13           C
ATOM    321  OD1 ASN A  47      21.836  56.578  30.985  1.00 22.43           O
ATOM    322  ND2 ASN A  47      20.298  54.924  31.025  1.00 21.69           N
ATOM    323  C   ASN A  47      25.005  54.096  32.331  1.00 17.70           C
ATOM    324  O   ASN A  47      25.360  54.449  33.463  1.00 16.85           O
ATOM    325  N   ARG A  48      25.490  53.003  31.726  1.00 17.01           N
ATOM    326  CA  ARG A  48      26.481  52.136  32.386  1.00 16.63           C
ATOM    327  CB  ARG A  48      26.733  50.878  31.532  1.00 16.60           C
ATOM    328  CG  ARG A  48      25.503  49.935  31.371  1.00 15.91           C
ATOM    329  CD  ARG A  48      25.856  48.627  30.677  1.00 18.73           C
ATOM    330  NE  ARG A  48      24.700  47.733  30.443  1.00 16.76           N
ATOM    331  CZ  ARG A  48      24.270  46.811  31.328  1.00 21.89           C
ATOM    332  NH1 ARG A  48      24.857  46.682  32.518  1.00 22.70           N
ATOM    333  NH2 ARG A  48      23.240  46.006  31.036  1.00 21.06           N
ATOM    334  C   ARG A  48      27.821  52.892  32.605  1.00 16.36           C
ATOM    335  O   ARG A  48      28.441  52.797  33.677  1.00 15.40           O
ATOM    336  N   VAL A  49      28.274  53.590  31.560  1.00 15.91           N
ATOM    337  CA  VAL A  49      29.555  54.277  31.589  1.00 17.55           C
ATOM    338  CB  VAL A  49      29.906  54.792  30.177  1.00 17.91           C
ATOM    339  CG1 VAL A  49      31.038  55.753  30.206  1.00 20.88           C
ATOM    340  CG2 VAL A  49      30.219  53.607  29.244  1.00 18.73           C
ATOM    341  C   VAL A  49      29.541  55.368  32.666  1.00 17.01           C
ATOM    342  O   VAL A  49      30.514  55.510  33.401  1.00 16.69           O
ATOM    343  N   GLN A  50      28.406  56.066  32.809  1.00 16.74           N
ATOM    344  CA  GLN A  50      28.226  57.059  33.887  1.00 18.03           C
ATOM    345  CB  GLN A  50      26.871  57.777  33.748  1.00 18.26           C
ATOM    346  CG  GLN A  50      26.544  58.730  34.921  1.00 19.48           C
ATOM    347  CD  GLN A  50      27.421  60.004  34.976  1.00 18.60           C
ATOM    348  OE1 GLN A  50      28.256  60.247  34.094  1.00 20.66           O
ATOM    349  NE2 GLN A  50      27.234  60.803  36.044  1.00 19.74           N
ATOM    350  C   GLN A  50      28.362  56.432  35.306  1.00 17.40           C
ATOM    351  O   GLN A  50      29.022  56.979  36.180  1.00 15.61           O
ATOM    352  N   VAL A  51      27.743  55.273  35.530  1.00 16.24           N
ATOM    353  CA  VAL A  51      27.966  54.549  36.797  1.00 16.12           C
ATOM    354  CB  VAL A  51      27.052  53.284  36.916  1.00 16.39           C
ATOM    355  CG1 VAL A  51      27.378  52.472  38.161  1.00 16.30           C
ATOM    356  CG2 VAL A  51      25.548  53.735  36.898  1.00 16.32           C
ATOM    357  C   VAL A  51      29.434  54.239  37.024  1.00 15.86           C
ATOM    358  O   VAL A  51      29.934  54.413  38.144  1.00 15.15           O
ATOM    359  N   LEU A  52      30.138  53.791  35.971  1.00 15.36           N
ATOM    360  CA  LEU A  52      31.532  53.421  36.089  1.00 15.68           C
ATOM    361  CB  LEU A  52      32.015  52.746  34.773  1.00 15.06           C
ATOM    362  CG  LEU A  52      31.522  51.287  34.643  1.00 16.27           C
ATOM    363  CD1 LEU A  52      31.766  50.730  33.265  1.00 21.39           C
ATOM    364  CD2 LEU A  52      32.188  50.396  35.693  1.00 17.56           C
ATOM    365  C   LEU A  52      32.438  54.630  36.492  1.00 14.74           C
ATOM    366  O   LEU A  52      33.402  54.463  37.249  1.00 14.72           O
ATOM    367  N   LYS A  53      32.106  55.824  35.985  1.00 15.91           N
ATOM    368  CA  LYS A  53      32.757  57.071  36.418  1.00 16.10           C
ATOM    369  CB  LYS A  53      32.165  58.286  35.688  1.00 15.42           C
ATOM    370  CG  LYS A  53      32.485  58.364  34.215  1.00 16.38           C
ATOM    371  CD  LYS A  53      32.029  59.738  33.653  1.00 16.08           C
ATOM    372  CE  LYS A  53      32.459  59.878  32.166  1.00 18.33           C
ATOM    373  NZ  LYS A  53      31.719  58.894  31.317  1.00 20.32           N
ATOM    374  C   LYS A  53      32.661  57.283  37.941  1.00 16.26           C
ATOM    375  O   LYS A  53      33.666  57.604  38.623  1.00 17.10           O
ATOM    376  N   ILE A  54      31.454  57.134  38.458  1.00 16.49           N
ATOM    377  CA  ILE A  54      31.147  57.308  39.892  1.00 15.87           C
ATOM    378  CB  ILE A  54      29.611  57.330  40.099  1.00 15.61           C
ATOM    379  CG1 ILE A  54      29.048  58.599  39.426  1.00 15.65           C
ATOM    380  CD1 ILE A  54      27.560  58.618  39.231  1.00 17.03           C
ATOM    381  CG2 ILE A  54      29.249  57.269  41.611  1.00 13.71           C
ATOM    382  C   ILE A  54      31.841  56.218  40.711  1.00 16.05           C
ATOM    383  O   ILE A  54      32.469  56.496  41.751  1.00 14.82           O
ATOM    384  N   LEU A  55      31.812  54.981  40.204  1.00 15.35           N
ATOM    385  CA  LEU A  55      32.430  53.883  40.965  1.00 15.61           C
ATOM    386  CB  LEU A  55      32.084  52.511  40.368  1.00 15.25           C
ATOM    387  CG  LEU A  55      30.604  52.146  40.404  1.00 16.31           C
ATOM    388  CD1 LEU A  55      30.457  50.818  39.678  1.00 17.58           C
ATOM    389  CD2 LEU A  55      30.060  52.101  41.893  1.00 20.79           C
ATOM    390  C   LEU A  55      33.934  54.082  41.080  1.00 16.21           C
ATOM    391  O   LEU A  55      34.503  53.825  42.140  1.00 16.42           O
ATOM    392  N   GLN A  56      34.574  54.593  40.019  1.00 16.04           N
ATOM    393  CA AGLN A  56      35.976  54.932  40.131  0.50 16.60           C
ATOM    394  CA BGLN A  56      35.983  54.960  40.104  0.50 16.29           C
ATOM    395  CB AGLN A  56      36.593  55.239  38.768  0.50 16.59           C
ATOM    396  CB BGLN A  56      36.562  55.356  38.732  0.50 16.10           C
ATOM    397  CG AGLN A  56      38.112  55.265  38.857  0.50 18.99           C
ATOM    398  CG BGLN A  56      37.993  55.942  38.828  0.50 16.83           C
ATOM    399  CD AGLN A  56      38.762  56.025  37.741  0.50 18.24           C
ATOM    400  CD BGLN A  56      38.970  54.999  39.548  0.50 16.67           C
ATOM    401  OE1AGLN A  56      38.141  56.340  36.762  0.50 21.83           O
ATOM    402  OE1BGLN A  56      39.543  54.145  38.930  0.50 22.11           O
ATOM    403  NE2AGLN A  56      40.039  56.323  37.902  0.50 26.11           N
ATOM    404  NE2BGLN A  56      39.160  55.191  40.851  0.50 25.77           N
ATOM    405  C   GLN A  56      36.226  56.087  41.132  1.00 16.44           C
ATOM    406  O   GLN A  56      37.173  56.015  41.931  1.00 16.52           O
ATOM    407  N   GLU A  57      35.403  57.141  41.092  1.00 16.14           N
ATOM    408  CA  GLU A  57      35.503  58.250  42.070  1.00 17.55           C
ATOM    409  CB  GLU A  57      34.343  59.240  41.844  1.00 16.49           C
ATOM    410  CG  GLU A  57      34.344  60.426  42.819  1.00 17.05           C
ATOM    411  CD  GLU A  57      35.294  61.551  42.395  1.00 17.52           C
ATOM    412  OE1 GLU A  57      35.873  61.487  41.270  1.00 18.64           O
ATOM    413  OE2 GLU A  57      35.462  62.492  43.205  1.00 18.78           O
ATOM    414  C   GLU A  57      35.451  57.676  43.525  1.00 18.10           C
ATOM    415  O   GLU A  57      36.250  58.045  44.403  1.00 19.86           O
ATOM    416  N   LEU A  58      34.529  56.751  43.748  1.00 18.65           N
ATOM    417  CA  LEU A  58      34.287  56.143  45.057  1.00 19.40           C
ATOM    418  CB  LEU A  58      32.932  55.389  45.108  1.00 19.53           C
ATOM    419  CG  LEU A  58      31.672  56.286  45.010  1.00 22.62           C
ATOM    420  CD1 LEU A  58      30.376  55.505  45.061  1.00 23.68           C
ATOM    421  CD2 LEU A  58      31.663  57.477  46.020  1.00 23.42           C
ATOM    422  C   LEU A  58      35.421  55.249  45.469  1.00 19.72           C
ATOM    423  O   LEU A  58      35.795  55.256  46.625  1.00 19.27           O
ATOM    424  N   ALA A  59      35.973  54.501  44.514  1.00 19.37           N
ATOM    425  CA  ALA A  59      37.052  53.561  44.793  1.00 19.75           C
ATOM    426  CB  ALA A  59      37.387  52.772  43.564  1.00 19.06           C
ATOM    427  C   ALA A  59      38.271  54.327  45.295  1.00 20.75           C
ATOM    428  O   ALA A  59      38.891  53.920  46.263  1.00 21.19           O
ATOM    429  N   GLN A  60      38.580  55.453  44.642  1.00 20.62           N
ATOM    430  CA AGLN A  60      39.727  56.258  45.031  0.50 21.03           C
ATOM    431  CA BGLN A  60      39.699  56.322  45.005  0.50 21.36           C
ATOM    432  CB AGLN A  60      40.171  57.187  43.884  0.50 20.99           C
ATOM    433  CB BGLN A  60      39.882  57.396  43.930  0.50 21.33           C
ATOM    434  CG AGLN A  60      40.721  56.418  42.659  0.50 20.01           C
ATOM    435  CG BGLN A  60      40.362  56.877  42.590  0.50 22.61           C
ATOM    436  CD AGLN A  60      41.952  57.063  42.021  0.50 20.86           C
ATOM    437  CD BGLN A  60      40.637  58.008  41.624  0.50 25.37           C
ATOM    438  OE1AGLN A  60      41.898  58.211  41.567  0.50 23.03           O
ATOM    439  OE1BGLN A  60      39.839  58.278  40.727  0.50 27.32           O
ATOM    440  NE2AGLN A  60      43.058  56.321  41.970  0.50 17.28           N
ATOM    441  NE2BGLN A  60      41.753  58.697  41.822  0.50 26.36           N
ATOM    442  C   GLN A  60      39.504  56.982  46.368  1.00 21.62           C
ATOM    443  O   GLN A  60      40.433  57.038  47.198  1.00 22.72           O
ATOM    444  N   ARG A  61      38.291  57.477  46.601  1.00 21.29           N
ATOM    445  CA  ARG A  61      37.928  58.111  47.876  1.00 21.59           C
ATOM    446  CB  ARG A  61      36.526  58.665  47.780  1.00 21.47           C
ATOM    447  CG  ARG A  61      36.042  59.281  49.073  1.00 23.75           C
ATOM    448  CD  ARG A  61      34.961  60.287  48.908  1.00 27.15           C
ATOM    449  NE  ARG A  61      34.390  60.568  50.214  1.00 25.21           N
ATOM    450  CZ  ARG A  61      33.146  60.967  50.404  1.00 31.47           C
ATOM    451  NH1 ARG A  61      32.330  61.156  49.368  1.00 29.00           N
ATOM    452  NH2 ARG A  61      32.713  61.151  51.646  1.00 30.98           N
ATOM    453  C   ARG A  61      38.009  57.057  48.998  1.00 22.13           C
ATOM    454  O   ARG A  61      38.483  57.316  50.111  1.00 21.37           O
ATOM    455  N   PHE A  62      37.565  55.851  48.674  1.00 21.27           N
ATOM    456  CA  PHE A  62      37.644  54.730  49.603  1.00 22.35           C
ATOM    457  CB  PHE A  62      36.943  53.520  48.936  1.00 22.50           C
ATOM    458  CG  PHE A  62      37.240  52.183  49.555  1.00 22.50           C
ATOM    459  CD1 PHE A  62      37.119  51.970  50.931  1.00 23.71           C
ATOM    460  CE1 PHE A  62      37.364  50.690  51.475  1.00 24.55           C
ATOM    461  CZ  PHE A  62      37.748  49.645  50.646  1.00 22.79           C
ATOM    462  CE2 PHE A  62      37.832  49.828  49.271  1.00 25.27           C
ATOM    463  CD2 PHE A  62      37.582  51.104  48.722  1.00 24.37           C
ATOM    464  C   PHE A  62      39.082  54.452  50.068  1.00 22.40           C
ATOM    465  O   PHE A  62      39.337  54.446  51.284  1.00 22.98           O
ATOM    466  N   VAL A  63      40.005  54.235  49.134  1.00 23.06           N
ATOM    467  CA  VAL A  63      41.412  54.006  49.456  1.00 24.46           C
ATOM    468  CB  VAL A  63      42.247  53.662  48.203  1.00 24.92           C
ATOM    469  CG1 VAL A  63      43.721  53.667  48.501  1.00 26.19           C
ATOM    470  CG2 VAL A  63      41.859  52.278  47.661  1.00 23.54           C
ATOM    471  C   VAL A  63      42.042  55.205  50.231  1.00 25.45           C
ATOM    472  O   VAL A  63      42.814  55.017  51.184  1.00 24.32           O
ATOM    473  N   TYR A  64      41.710  56.416  49.813  1.00 25.61           N
ATOM    474  CA  TYR A  64      42.213  57.608  50.508  1.00 26.52           C
ATOM    475  CB  TYR A  64      41.768  58.870  49.786  1.00 26.89           C
ATOM    476  CG  TYR A  64      42.205  60.138  50.478  1.00 28.41           C
ATOM    477  CD1 TYR A  64      43.518  60.609  50.350  1.00 28.63           C
ATOM    478  CE1 TYR A  64      43.933  61.791  51.014  1.00 29.16           C
ATOM    479  CZ  TYR A  64      43.019  62.486  51.799  1.00 30.49           C
ATOM    480  OH  TYR A  64      43.395  63.646  52.461  1.00 31.71           O
ATOM    481  CE2 TYR A  64      41.709  62.028  51.946  1.00 30.54           C
ATOM    482  CD2 TYR A  64      41.314  60.846  51.289  1.00 29.62           C
ATOM    483  C   TYR A  64      41.752  57.651  51.964  1.00 26.64           C
ATOM    484  O   TYR A  64      42.560  57.858  52.886  1.00 26.90           O
ATOM    485  N   GLU A  65      40.451  57.492  52.161  1.00 26.54           N
ATOM    486  CA  GLU A  65      39.861  57.546  53.516  1.00 27.42           C
ATOM    487  CB  GLU A  65      38.342  57.588  53.446  1.00 27.60           C
ATOM    488  CG  GLU A  65      37.828  58.888  52.824  1.00 29.51           C
ATOM    489  CD  GLU A  65      36.353  59.166  53.038  1.00 34.21           C
ATOM    490  OE1 GLU A  65      35.659  58.397  53.748  1.00 38.08           O
ATOM    491  OE2 GLU A  65      35.870  60.186  52.485  1.00 33.50           O
ATOM    492  C   GLU A  65      40.399  56.458  54.456  1.00 27.97           C
ATOM    493  O   GLU A  65      40.723  56.736  55.631  1.00 27.68           O
ATOM    494  N   VAL A  66      40.512  55.230  53.946  1.00 27.87           N
ATOM    495  CA  VAL A  66      41.104  54.126  54.727  1.00 28.98           C
ATOM    496  CB  VAL A  66      41.036  52.770  53.952  1.00 28.38           C
ATOM    497  CG1 VAL A  66      41.846  51.641  54.686  1.00 29.36           C
ATOM    498  CG2 VAL A  66      39.591  52.364  53.741  1.00 28.12           C
ATOM    499  C   VAL A  66      42.547  54.422  55.136  1.00 29.73           C
ATOM    500  O   VAL A  66      42.911  54.250  56.314  1.00 30.82           O
ATOM    501  N   SER A  67      43.342  54.869  54.166  1.00 30.22           N
ATOM    502  CA  SER A  67      44.722  55.299  54.354  1.00 30.77           C
ATOM    503  CB  SER A  67      45.302  55.838  53.031  1.00 31.04           C
ATOM    504  OG  SER A  67      45.400  54.828  52.034  1.00 29.60           O
ATOM    505  C   SER A  67      44.875  56.353  55.468  1.00 31.93           C
ATOM    506  O   SER A  67      45.750  56.217  56.325  1.00 30.52           O
ATOM    507  N   LYS A  68      44.016  57.374  55.447  1.00 32.74           N
ATOM    508  CA ALYS A  68      44.002  58.407  56.487  0.50 34.01           C
ATOM    509  CA BLYS A  68      44.008  58.405  56.485  0.50 33.88           C
ATOM    510  CB ALYS A  68      43.028  59.523  56.132  0.50 33.88           C
ATOM    511  CB BLYS A  68      43.071  59.556  56.109  0.50 33.60           C
ATOM    512  CG ALYS A  68      43.561  60.551  55.163  0.50 34.24           C
ATOM    513  CG BLYS A  68      43.582  60.456  54.984  0.50 33.46           C
ATOM    514  CD ALYS A  68      42.538  61.656  54.984  0.50 34.84           C
ATOM    515  CD BLYS A  68      44.927  61.102  55.318  0.50 32.20           C
ATOM    516  CE ALYS A  68      42.610  62.699  56.092  0.50 35.28           C
ATOM    517  CE BLYS A  68      44.830  62.082  56.479  0.50 33.72           C
ATOM    518  NZ ALYS A  68      41.268  63.262  56.429  0.50 34.44           N
ATOM    519  NZ BLYS A  68      46.186  62.519  56.934  0.50 33.11           N
ATOM    520  C   LYS A  68      43.628  57.832  57.850  1.00 34.78           C
ATOM    521  O   LYS A  68      44.232  58.184  58.871  1.00 34.75           O
ATOM    522  N   LYS A  69      42.633  56.947  57.871  1.00 35.60           N
ATOM    523  CA  LYS A  69      42.244  56.275  59.110  1.00 37.88           C
ATOM    524  CB  LYS A  69      40.979  55.438  58.915  1.00 37.50           C
ATOM    525  CG  LYS A  69      39.669  56.248  58.970  1.00 39.24           C
ATOM    526  CD  LYS A  69      38.440  55.369  58.699  1.00 40.08           C
ATOM    527  CE  LYS A  69      38.125  54.433  59.880  1.00 43.63           C
ATOM    528  NZ  LYS A  69      37.281  53.257  59.465  1.00 44.81           N
ATOM    529  C   LYS A  69      43.405  55.424  59.651  1.00 38.35           C
ATOM    530  O   LYS A  69      43.520  55.219  60.855  1.00 39.29           O
ATOM    531  N   LYS A  70      44.289  54.964  58.773  1.00 38.89           N
ATOM    532  CA  LYS A  70      45.474  54.218  59.207  1.00 39.22           C
ATOM    533  CB  LYS A  70      45.707  53.012  58.289  1.00 38.99           C
ATOM    534  CG  LYS A  70      44.448  52.142  58.310  1.00 39.77           C
ATOM    535  CD  LYS A  70      44.556  50.802  57.633  1.00 40.57           C
ATOM    536  CE  LYS A  70      43.268  50.029  57.909  1.00 41.14           C
ATOM    537  NZ  LYS A  70      43.286  48.675  57.305  1.00 42.06           N
ATOM    538  C   LYS A  70      46.704  55.113  59.443  1.00 39.55           C
ATOM    539  O   LYS A  70      47.874  54.702  59.275  1.00 39.33           O
ATOM    540  N   ASN A  71      46.375  56.335  59.870  1.00 39.74           N
ATOM    541  CA AASN A  71      47.349  57.374  60.227  0.50 40.17           C
ATOM    542  CA BASN A  71      47.317  57.409  60.196  0.50 40.21           C
ATOM    543  CB AASN A  71      48.016  57.048  61.578  0.50 40.32           C
ATOM    544  CB BASN A  71      47.905  57.231  61.600  0.50 40.45           C
ATOM    545  CG AASN A  71      47.014  56.600  62.628  0.50 40.14           C
ATOM    546  CG BASN A  71      47.915  58.524  62.378  0.50 40.41           C
ATOM    547  OD1AASN A  71      46.146  57.368  63.056  0.50 40.22           O
ATOM    548  OD1BASN A  71      48.973  59.062  62.689  0.50 41.33           O
ATOM    549  ND2AASN A  71      47.123  55.346  63.041  0.50 40.27           N
ATOM    550  ND2BASN A  71      46.726  59.049  62.671  0.50 40.87           N
ATOM    551  C   ASN A  71      48.403  57.708  59.158  1.00 40.33           C
ATOM    552  O   ASN A  71      49.518  58.128  59.491  1.00 40.93           O
ATOM    553  N   MET A  72      48.065  57.534  57.879  1.00 39.99           N
ATOM    554  CA  MET A  72      48.980  57.948  56.816  1.00 39.61           C
ATOM    555  CB  MET A  72      48.733  57.166  55.529  1.00 39.56           C
ATOM    556  CG  MET A  72      49.087  55.711  55.679  1.00 39.62           C
ATOM    557  SD  MET A  72      48.659  54.754  54.229  1.00 40.86           S
ATOM    558  CE  MET A  72      49.893  55.311  53.075  1.00 36.95           C
ATOM    559  C   MET A  72      48.843  59.437  56.559  1.00 38.96           C
ATOM    560  O   MET A  72      47.787  60.034  56.815  1.00 37.93           O
ATOM    561  N   SER A  73      49.916  60.030  56.051  1.00 39.18           N
ATOM    562  CA  SER A  73      49.915  61.447  55.707  1.00 39.40           C
ATOM    563  CB  SER A  73      51.327  61.898  55.368  1.00 39.43           C
ATOM    564  OG  SER A  73      51.675  61.594  54.027  1.00 39.39           O
ATOM    565  C   SER A  73      48.986  61.710  54.524  1.00 40.07           C
ATOM    566  O   SER A  73      48.790  60.823  53.691  1.00 39.46           O
ATOM    567  N   ASP A  74      48.427  62.921  54.459  1.00 40.78           N
ATOM    568  CA  ASP A  74      47.608  63.361  53.324  1.00 41.84           C
ATOM    569  CB  ASP A  74      47.425  64.887  53.332  1.00 42.70           C
ATOM    570  CG  ASP A  74      46.142  65.334  54.030  1.00 45.42           C
ATOM    571  OD1 ASP A  74      45.251  64.491  54.266  1.00 49.68           O
ATOM    572  OD2 ASP A  74      45.919  66.526  54.364  1.00 47.91           O
ATOM    573  C   ASP A  74      48.206  62.934  51.985  1.00 41.81           C
ATOM    574  O   ASP A  74      47.535  62.296  51.168  1.00 41.38           O
ATOM    575  N   GLY A  75      49.473  63.272  51.774  1.00 41.95           N
ATOM    576  CA  GLY A  75      50.153  62.987  50.513  1.00 42.01           C
ATOM    577  C   GLY A  75      50.313  61.508  50.242  1.00 42.42           C
ATOM    578  O   GLY A  75      50.176  61.056  49.100  1.00 42.91           O
ATOM    579  N   MET A  76      50.596  60.743  51.293  1.00 41.62           N
ATOM    580  CA  MET A  76      50.788  59.310  51.150  1.00 42.15           C
ATOM    581  CB  MET A  76      51.447  58.744  52.403  1.00 41.35           C
ATOM    582  CG  MET A  76      52.625  57.835  52.106  1.00 44.44           C
ATOM    583  SD  MET A  76      53.589  57.462  53.598  1.00 47.16           S
ATOM    584  CE  MET A  76      54.220  59.098  54.044  1.00 47.90           C
ATOM    585  C   MET A  76      49.458  58.600  50.883  1.00 40.61           C
ATOM    586  O   MET A  76      49.418  57.620  50.130  1.00 40.16           O
ATOM    587  N   ALA A  77      48.388  59.104  51.504  1.00 39.64           N
ATOM    588  CA  ALA A  77      47.037  58.546  51.373  1.00 39.40           C
ATOM    589  CB  ALA A  77      46.087  59.212  52.356  1.00 38.77           C
ATOM    590  C   ALA A  77      46.534  58.708  49.935  1.00 39.85           C
ATOM    591  O   ALA A  77      45.839  57.831  49.400  1.00 39.46           O
ATOM    592  N   ARG A  78      46.900  59.829  49.318  1.00 40.01           N
ATOM    593  CA AARG A  78      46.585  60.052  47.902  0.50 40.40           C
ATOM    594  CA BARG A  78      46.596  60.066  47.922  0.50 40.19           C
ATOM    595  CB AARG A  78      46.885  61.471  47.435  0.50 40.60           C
ATOM    596  CB BARG A  78      46.954  61.496  47.576  0.50 40.25           C
ATOM    597  CG AARG A  78      46.886  61.582  45.887  0.50 41.68           C
ATOM    598  CG BARG A  78      45.981  62.518  48.143  0.50 40.27           C
ATOM    599  CD AARG A  78      46.679  62.985  45.338  0.50 42.42           C
ATOM    600  CD BARG A  78      45.939  63.791  47.337  0.50 40.85           C
ATOM    601  NE AARG A  78      45.391  63.555  45.755  0.50 44.84           N
ATOM    602  NE BARG A  78      46.200  63.503  45.928  0.50 42.62           N
ATOM    603  CZ AARG A  78      44.351  63.764  44.950  0.50 44.62           C
ATOM    604  CZ BARG A  78      45.267  63.203  45.026  0.50 42.51           C
ATOM    605  NH1AARG A  78      43.236  64.291  45.435  0.50 45.04           N
ATOM    606  NH1BARG A  78      43.983  63.157  45.360  0.50 42.74           N
ATOM    607  NH2AARG A  78      44.419  63.462  43.660  0.50 45.50           N
ATOM    608  NH2BARG A  78      45.623  62.948  43.781  0.50 41.52           N
ATOM    609  C   ARG A  78      47.347  59.083  47.027  1.00 40.29           C
ATOM    610  O   ARG A  78      46.743  58.407  46.171  1.00 40.53           O
ATOM    611  N   ASP A  79      48.663  59.004  47.239  1.00 39.31           N
ATOM    612  CA  ASP A  79      49.530  58.116  46.469  1.00 38.46           C
ATOM    613  CB  ASP A  79      50.958  58.238  46.976  1.00 39.52           C
ATOM    614  CG  ASP A  79      51.825  59.053  46.080  1.00 41.32           C
ATOM    615  OD1 ASP A  79      51.396  59.441  44.971  1.00 44.46           O
ATOM    616  OD2 ASP A  79      52.988  59.325  46.408  1.00 45.10           O
ATOM    617  C   ASP A  79      49.147  56.644  46.521  1.00 37.04           C
ATOM    618  O   ASP A  79      49.573  55.876  45.658  1.00 37.83           O
ATOM    619  N   ALA A  80      48.396  56.246  47.554  1.00 34.50           N
ATOM    620  CA  ALA A  80      47.922  54.874  47.712  1.00 32.41           C
ATOM    621  CB  ALA A  80      47.178  54.719  49.018  1.00 32.12           C
ATOM    622  C   ALA A  80      47.029  54.454  46.508  1.00 30.85           C
ATOM    623  O   ALA A  80      46.984  53.279  46.139  1.00 30.69           O
ATOM    624  N   GLY A  81      46.356  55.430  45.898  1.00 28.98           N
ATOM    625  CA  GLY A  81      45.620  55.213  44.642  1.00 26.57           C
ATOM    626  C   GLY A  81      44.339  54.426  44.810  1.00 25.24           C
ATOM    627  O   GLY A  81      43.445  54.841  45.558  1.00 24.38           O
ATOM    628  N   GLY A  82      44.243  53.313  44.074  1.00 24.39           N
ATOM    629  CA  GLY A  82      43.027  52.500  43.996  1.00 23.12           C
ATOM    630  C   GLY A  82      42.455  52.648  42.587  1.00 21.89           C
ATOM    631  O   GLY A  82      42.513  53.727  41.976  1.00 21.35           O
ATOM    632  N   LYS A  83      41.943  51.560  42.022  1.00 21.55           N
ATOM    633  CA  LYS A  83      41.261  51.710  40.736  1.00 19.80           C
ATOM    634  CB  LYS A  83      42.272  51.650  39.572  1.00 19.52           C
ATOM    635  CG  LYS A  83      42.792  50.232  39.286  1.00 20.28           C
ATOM    636  CD  LYS A  83      43.695  50.214  38.089  1.00 21.83           C
ATOM    637  CE  LYS A  83      42.907  50.269  36.786  1.00 23.07           C
ATOM    638  NZ  LYS A  83      43.819  50.185  35.618  1.00 23.96           N
ATOM    639  C   LYS A  83      40.192  50.638  40.578  1.00 19.45           C
ATOM    640  O   LYS A  83      40.071  49.738  41.414  1.00 19.72           O
ATOM    641  N   ILE A  84      39.423  50.745  39.490  1.00 18.33           N
ATOM    642  CA  ILE A  84      38.480  49.695  39.109  1.00 17.95           C
ATOM    643  CB  ILE A  84      36.989  50.223  39.144  1.00 15.90           C
ATOM    644  CG1 ILE A  84      36.730  51.270  38.034  1.00 17.59           C
ATOM    645  CD1 ILE A  84      35.254  51.597  37.834  1.00 19.15           C
ATOM    646  CG2 ILE A  84      36.626  50.817  40.561  1.00 16.84           C
ATOM    647  C   ILE A  84      38.805  49.020  37.753  1.00 17.38           C
ATOM    648  O   ILE A  84      39.460  49.604  36.845  1.00 18.29           O
ATOM    649  N   PHE A  85      38.362  47.777  37.604  1.00 17.14           N
ATOM    650  CA  PHE A  85      38.323  47.135  36.293  1.00 17.92           C
ATOM    651  CB  PHE A  85      39.264  45.932  36.190  1.00 19.20           C
ATOM    652  CG  PHE A  85      40.713  46.262  36.385  1.00 18.80           C
ATOM    653  CD1 PHE A  85      41.228  46.376  37.668  1.00 21.56           C
ATOM    654  CE1 PHE A  85      42.579  46.673  37.864  1.00 20.90           C
ATOM    655  CZ  PHE A  85      43.415  46.820  36.779  1.00 20.57           C
ATOM    656  CE2 PHE A  85      42.906  46.696  35.471  1.00 23.20           C
ATOM    657  CD2 PHE A  85      41.558  46.401  35.292  1.00 21.92           C
ATOM    658  C   PHE A  85      36.930  46.549  36.146  1.00 16.52           C
ATOM    659  O   PHE A  85      36.375  46.035  37.120  1.00 16.67           O
ATOM    660  N   THR A  86      36.378  46.590  34.938  1.00 16.41           N
ATOM    661  CA  THR A  86      35.196  45.779  34.655  1.00 16.24           C
ATOM    662  CB  THR A  86      34.576  46.181  33.288  1.00 16.31           C
ATOM    663  OG1 THR A  86      35.576  46.095  32.260  1.00 17.74           O
ATOM    664  CG2 THR A  86      34.215  47.648  33.276  1.00 18.46           C
ATOM    665  C   THR A  86      35.661  44.330  34.544  1.00 16.72           C
ATOM    666  O   THR A  86      36.873  44.050  34.382  1.00 16.59           O
ATOM    667  N   TYR A  87      34.690  43.425  34.638  1.00 16.62           N
ATOM    668  CA  TYR A  87      34.844  42.019  34.259  1.00 17.94           C
ATOM    669  CB  TYR A  87      35.550  41.167  35.376  1.00 18.67           C
ATOM    670  CG  TYR A  87      34.794  41.021  36.687  1.00 20.46           C
ATOM    671  CD1 TYR A  87      34.225  39.798  37.051  1.00 20.86           C
ATOM    672  CE1 TYR A  87      33.528  39.663  38.281  1.00 23.06           C
ATOM    673  CZ  TYR A  87      33.444  40.749  39.150  1.00 21.92           C
ATOM    674  OH  TYR A  87      32.765  40.631  40.333  1.00 24.41           O
ATOM    675  CE2 TYR A  87      34.009  41.965  38.827  1.00 18.72           C
ATOM    676  CD2 TYR A  87      34.702  42.088  37.590  1.00 19.87           C
ATOM    677  C   TYR A  87      33.457  41.517  33.836  1.00 17.45           C
ATOM    678  O   TYR A  87      32.557  42.317  33.625  1.00 18.42           O
ATOM    679  N   GLY A  88      33.307  40.212  33.634  1.00 17.26           N
ATOM    680  CA  GLY A  88      32.044  39.678  33.208  1.00 17.66           C
ATOM    681  C   GLY A  88      31.608  40.112  31.812  1.00 17.74           C
ATOM    682  O   GLY A  88      32.418  40.554  30.967  1.00 16.82           O
ATOM    683  N   SER A  89      30.320  39.955  31.574  1.00 18.19           N
ATOM    684  CA  SER A  89      29.801  40.045  30.212  1.00 18.15           C
ATOM    685  CB  SER A  89      28.375  39.479  30.128  1.00 19.45           C
ATOM    686  OG  SER A  89      27.424  40.231  30.875  1.00 19.85           O
ATOM    687  C   SER A  89      29.877  41.443  29.616  1.00 18.40           C
ATOM    688  O   SER A  89      30.000  41.579  28.406  1.00 17.89           O
ATOM    689  N   TYR A  90      29.813  42.480  30.452  1.00 17.53           N
ATOM    690  CA  TYR A  90      30.017  43.834  29.916  1.00 18.52           C
ATOM    691  CB  TYR A  90      29.609  44.872  30.972  1.00 17.38           C
ATOM    692  CG  TYR A  90      29.850  46.275  30.526  1.00 18.80           C
ATOM    693  CD1 TYR A  90      28.975  46.896  29.635  1.00 17.60           C
ATOM    694  CE1 TYR A  90      29.206  48.206  29.202  1.00 20.49           C
ATOM    695  CZ  TYR A  90      30.291  48.923  29.694  1.00 23.22           C
ATOM    696  OH  TYR A  90      30.521  50.238  29.264  1.00 21.91           O
ATOM    697  CE2 TYR A  90      31.166  48.339  30.599  1.00 24.17           C
ATOM    698  CD2 TYR A  90      30.948  46.996  31.000  1.00 21.77           C
ATOM    699  C   TYR A  90      31.450  44.022  29.396  1.00 18.17           C
ATOM    700  O   TYR A  90      31.659  44.595  28.309  1.00 17.46           O
ATOM    701  N   ARG A  91      32.449  43.482  30.118  1.00 18.07           N
ATOM    702  CA  ARG A  91      33.842  43.566  29.634  1.00 17.67           C
ATOM    703  CB  ARG A  91      34.892  43.169  30.711  1.00 17.77           C
ATOM    704  CG  ARG A  91      36.339  43.447  30.299  1.00 16.77           C
ATOM    705  CD  ARG A  91      37.362  42.958  31.317  1.00 16.69           C
ATOM    706  NE  ARG A  91      38.730  43.309  30.984  1.00 18.13           N
ATOM    707  CZ  ARG A  91      39.334  44.438  31.332  1.00 21.11           C
ATOM    708  NH1 ARG A  91      38.667  45.403  31.960  1.00 22.34           N
ATOM    709  NH2 ARG A  91      40.607  44.635  30.998  1.00 22.03           N
ATOM    710  C   ARG A  91      34.010  42.699  28.375  1.00 18.19           C
ATOM    711  O   ARG A  91      34.674  43.100  27.434  1.00 18.33           O
ATOM    712  N   LEU A  92      33.376  41.532  28.357  1.00 18.12           N
ATOM    713  CA  LEU A  92      33.463  40.594  27.235  1.00 19.00           C
ATOM    714  CB  LEU A  92      32.857  39.257  27.681  1.00 19.90           C
ATOM    715  CG  LEU A  92      33.534  37.903  27.421  1.00 24.03           C
ATOM    716  CD1 LEU A  92      32.480  36.760  27.277  1.00 22.10           C
ATOM    717  CD2 LEU A  92      34.610  37.861  26.358  1.00 22.26           C
ATOM    718  C   LEU A  92      32.732  41.106  25.997  1.00 19.32           C
ATOM    719  O   LEU A  92      32.987  40.605  24.883  1.00 20.15           O
ATOM    720  N   GLY A  93      31.852  42.105  26.196  1.00 18.39           N
ATOM    721  CA  GLY A  93      31.013  42.697  25.126  1.00 18.27           C
ATOM    722  C   GLY A  93      29.834  41.857  24.648  1.00 17.58           C
ATOM    723  O   GLY A  93      29.364  42.025  23.516  1.00 18.15           O
ATOM    724  N   VAL A  94      29.308  40.996  25.510  1.00 17.21           N
ATOM    725  CA  VAL A  94      28.135  40.169  25.195  1.00 16.85           C
ATOM    726  CB  VAL A  94      28.505  38.668  25.136  1.00 15.52           C
ATOM    727  CG1 VAL A  94      29.577  38.438  24.078  1.00 15.60           C
ATOM    728  CG2 VAL A  94      28.961  38.139  26.529  1.00 16.70           C
ATOM    729  C   VAL A  94      26.981  40.422  26.202  1.00 17.03           C
ATOM    730  O   VAL A  94      26.041  39.646  26.314  1.00 16.81           O
ATOM    731  N   HIS A  95      27.034  41.536  26.910  1.00 17.90           N
ATOM    732  CA  HIS A  95      25.947  41.852  27.873  1.00 17.95           C
ATOM    733  CB  HIS A  95      26.387  43.010  28.776  1.00 18.40           C
ATOM    734  CG  HIS A  95      26.675  44.254  28.006  1.00 17.97           C
ATOM    735  ND1 HIS A  95      27.720  44.336  27.113  1.00 21.14           N
ATOM    736  CE1 HIS A  95      27.714  45.530  26.538  1.00 22.31           C
ATOM    737  NE2 HIS A  95      26.696  46.218  27.022  1.00 20.16           N
ATOM    738  CD2 HIS A  95      26.025  45.441  27.941  1.00 20.86           C
ATOM    739  C   HIS A  95      24.670  42.286  27.136  1.00 19.28           C
ATOM    740  O   HIS A  95      24.712  42.801  25.989  1.00 19.48           O
ATOM    741  N   GLY A  96      23.530  42.087  27.791  1.00 19.49           N
ATOM    742  CA  GLY A  96      22.288  42.654  27.304  1.00 20.34           C
ATOM    743  C   GLY A  96      21.749  43.758  28.232  1.00 20.83           C
ATOM    744  O   GLY A  96      22.411  44.138  29.206  1.00 20.10           O
ATOM    745  N   PRO A  97      20.573  44.282  27.894  1.00 21.76           N
ATOM    746  CA  PRO A  97      19.974  45.424  28.606  1.00 22.76           C
ATOM    747  CB  PRO A  97      18.617  45.648  27.886  1.00 22.49           C
ATOM    748  CG  PRO A  97      18.685  44.924  26.627  1.00 22.76           C
ATOM    749  CD  PRO A  97      19.743  43.846  26.752  1.00 22.62           C
ATOM    750  C   PRO A  97      19.794  45.137  30.090  1.00 23.04           C
ATOM    751  O   PRO A  97      19.989  46.058  30.910  1.00 23.41           O
ATOM    752  N   GLY A  98      19.477  43.880  30.430  1.00 22.61           N
ATOM    753  CA  GLY A  98      19.260  43.467  31.813  1.00 22.61           C
ATOM    754  C   GLY A  98      20.508  43.051  32.599  1.00 21.90           C
ATOM    755  O   GLY A  98      20.416  42.837  33.807  1.00 23.54           O
ATOM    756  N   SER A  99      21.661  42.908  31.935  1.00 21.31           N
ATOM    757  CA  SER A  99      22.854  42.346  32.593  1.00 20.10           C
ATOM    758  CB  SER A  99      23.992  42.072  31.580  1.00 20.65           C
ATOM    759  OG  SER A  99      23.516  41.281  30.510  1.00 18.38           O
ATOM    760  C   SER A  99      23.385  43.296  33.657  1.00 20.58           C
ATOM    761  O   SER A  99      23.260  44.531  33.517  1.00 20.56           O
ATOM    762  N   ASP A 100      24.025  42.725  34.671  1.00 20.19           N
ATOM    763  CA  ASP A 100      24.748  43.545  35.676  1.00 19.41           C
ATOM    764  CB  ASP A 100      24.971  42.795  37.019  1.00 18.30           C
ATOM    765  CG  ASP A 100      25.850  41.517  36.910  1.00 21.16           C
ATOM    766  OD1 ASP A 100      26.353  41.143  35.827  1.00 18.70           O
ATOM    767  OD2 ASP A 100      26.113  40.813  37.920  1.00 21.58           O
ATOM    768  C   ASP A 100      26.030  44.117  35.085  1.00 19.31           C
ATOM    769  O   ASP A 100      26.458  43.724  33.991  1.00 19.04           O
ATOM    770  N   ILE A 101      26.620  45.081  35.792  1.00 18.83           N
ATOM    771  CA  ILE A 101      28.012  45.419  35.550  1.00 19.37           C
ATOM    772  CB  ILE A 101      28.242  46.956  35.550  1.00 19.60           C
ATOM    773  CG1 ILE A 101      27.231  47.653  34.631  1.00 19.86           C
ATOM    774  CD1 ILE A 101      27.176  49.172  34.772  1.00 20.43           C
ATOM    775  CG2 ILE A 101      29.712  47.253  35.235  1.00 20.25           C
ATOM    776  C   ILE A 101      28.842  44.806  36.671  1.00 18.29           C
ATOM    777  O   ILE A 101      28.680  45.175  37.849  1.00 19.85           O
ATOM    778  N   ASP A 102      29.714  43.863  36.333  1.00 16.88           N
ATOM    779  CA  ASP A 102      30.660  43.339  37.284  1.00 16.58           C
ATOM    780  CB  ASP A 102      31.088  41.962  36.838  1.00 16.55           C
ATOM    781  CG  ASP A 102      29.914  41.051  36.735  1.00 17.92           C
ATOM    782  OD1 ASP A 102      29.465  40.538  37.791  1.00 19.12           O
ATOM    783  OD2 ASP A 102      29.352  40.850  35.640  1.00 17.73           O
ATOM    784  C   ASP A 102      31.862  44.253  37.427  1.00 17.04           C
ATOM    785  O   ASP A 102      32.573  44.501  36.444  1.00 17.46           O
ATOM    786  N   THR A 103      32.093  44.744  38.648  1.00 16.08           N
ATOM    787  CA  THR A 103      33.126  45.757  38.876  1.00 16.17           C
ATOM    788  CB  THR A 103      32.448  47.099  39.254  1.00 15.93           C
ATOM    789  OG1 THR A 103      31.514  47.496  38.215  1.00 17.61           O
ATOM    790  CG2 THR A 103      33.493  48.202  39.322  1.00 16.58           C
ATOM    791  C   THR A 103      34.083  45.269  39.987  1.00 16.92           C
ATOM    792  O   THR A 103      33.625  44.965  41.089  1.00 17.21           O
ATOM    793  N   LEU A 104      35.380  45.232  39.666  1.00 16.45           N
ATOM    794  CA  LEU A 104      36.454  44.774  40.535  1.00 18.47           C
ATOM    795  CB  LEU A 104      37.426  43.889  39.738  1.00 18.43           C
ATOM    796  CG  LEU A 104      38.849  43.680  40.308  1.00 19.97           C
ATOM    797  CD1 LEU A 104      38.768  42.912  41.642  1.00 23.38           C
ATOM    798  CD2 LEU A 104      39.746  42.957  39.291  1.00 19.41           C
ATOM    799  C   LEU A 104      37.158  46.037  41.061  1.00 18.10           C
ATOM    800  O   LEU A 104      37.555  46.906  40.282  1.00 18.29           O
ATOM    801  N   VAL A 105      37.229  46.156  42.385  1.00 18.75           N
ATOM    802  CA  VAL A 105      37.893  47.304  43.017  1.00 20.03           C
ATOM    803  CB  VAL A 105      37.060  47.856  44.190  1.00 20.71           C
ATOM    804  CG1 VAL A 105      37.789  49.099  44.828  1.00 21.73           C
ATOM    805  CG2 VAL A 105      35.658  48.242  43.736  1.00 19.13           C
ATOM    806  C   VAL A 105      39.258  46.802  43.501  1.00 20.98           C
ATOM    807  O   VAL A 105      39.326  45.859  44.310  1.00 21.94           O
ATOM    808  N   VAL A 106      40.323  47.375  42.962  1.00 21.52           N
ATOM    809  CA  VAL A 106      41.666  46.930  43.301  1.00 23.17           C
ATOM    810  CB  VAL A 106      42.514  46.663  42.064  1.00 23.12           C
ATOM    811  CG1 VAL A 106      43.852  46.135  42.479  1.00 23.60           C
ATOM    812  CG2 VAL A 106      41.831  45.623  41.194  1.00 23.89           C
ATOM    813  C   VAL A 106      42.298  47.939  44.280  1.00 23.65           C
ATOM    814  O   VAL A 106      42.368  49.133  43.991  1.00 22.84           O
ATOM    815  N   VAL A 107      42.712  47.435  45.444  1.00 25.09           N
ATOM    816  CA  VAL A 107      43.147  48.287  46.562  1.00 26.11           C
ATOM    817  CB  VAL A 107      42.123  48.294  47.717  1.00 26.50           C
ATOM    818  CG1 VAL A 107      40.717  48.822  47.225  1.00 25.51           C
ATOM    819  CG2 VAL A 107      42.010  46.905  48.404  1.00 24.82           C
ATOM    820  C   VAL A 107      44.516  47.798  47.070  1.00 28.00           C
ATOM    821  O   VAL A 107      44.790  46.593  47.001  1.00 28.14           O
ATOM    822  N   PRO A 108      45.357  48.713  47.579  1.00 29.38           N
ATOM    823  CA  PRO A 108      46.682  48.334  48.144  1.00 30.18           C
ATOM    824  CB  PRO A 108      47.398  49.696  48.317  1.00 29.45           C
ATOM    825  CG  PRO A 108      46.280  50.705  48.513  1.00 30.93           C
ATOM    826  CD  PRO A 108      45.130  50.174  47.644  1.00 29.73           C
ATOM    827  C   PRO A 108      46.592  47.563  49.467  1.00 30.91           C
ATOM    828  O   PRO A 108      45.522  47.476  50.066  1.00 30.00           O
ATOM    829  N   LYS A 109      47.733  47.050  49.940  1.00 33.01           N
ATOM    830  CA  LYS A 109      47.788  46.053  51.030  1.00 34.34           C
ATOM    831  CB  LYS A 109      49.225  45.565  51.268  1.00 34.79           C
ATOM    832  CG  LYS A 109      50.270  46.676  51.283  1.00 37.01           C
ATOM    833  CD  LYS A 109      51.696  46.123  51.190  1.00 38.03           C
ATOM    834  CE  LYS A 109      52.369  46.072  52.560  1.00 43.86           C
ATOM    835  NZ  LYS A 109      53.850  46.282  52.439  1.00 46.70           N
ATOM    836  C   LYS A 109      47.124  46.416  52.347  1.00 33.30           C
ATOM    837  O   LYS A 109      46.593  45.545  53.044  1.00 33.55           O
ATOM    838  N   HIS A 110      47.122  47.706  52.670  1.00 32.34           N
ATOM    839  CA  HIS A 110      46.604  48.168  53.953  1.00 31.83           C
ATOM    840  CB  HIS A 110      47.296  49.469  54.352  1.00 31.82           C
ATOM    841  CG  HIS A 110      47.265  50.529  53.291  1.00 31.45           C
ATOM    842  ND1 HIS A 110      46.356  51.565  53.299  1.00 33.95           N
ATOM    843  CE1 HIS A 110      46.585  52.355  52.266  1.00 31.50           C
ATOM    844  NE2 HIS A 110      47.617  51.877  51.599  1.00 30.16           N
ATOM    845  CD2 HIS A 110      48.055  50.733  52.215  1.00 29.16           C
ATOM    846  C   HIS A 110      45.093  48.372  53.931  1.00 31.77           C
ATOM    847  O   HIS A 110      44.499  48.752  54.935  1.00 31.45           O
ATOM    848  N   VAL A 111      44.480  48.125  52.776  1.00 31.21           N
ATOM    849  CA  VAL A 111      43.030  48.238  52.645  1.00 31.10           C
ATOM    850  CB  VAL A 111      42.620  48.997  51.351  1.00 31.06           C
ATOM    851  CG1 VAL A 111      41.090  49.123  51.276  1.00 29.77           C
ATOM    852  CG2 VAL A 111      43.329  50.365  51.256  1.00 29.38           C
ATOM    853  C   VAL A 111      42.467  46.826  52.574  1.00 31.94           C
ATOM    854  O   VAL A 111      42.766  46.092  51.625  1.00 33.27           O
ATOM    855  N   THR A 112      41.641  46.453  53.541  1.00 31.90           N
ATOM    856  CA  THR A 112      41.171  45.076  53.610  1.00 33.09           C
ATOM    857  CB  THR A 112      41.461  44.506  54.993  1.00 32.89           C
ATOM    858  OG1 THR A 112      40.648  45.181  55.951  1.00 33.87           O
ATOM    859  CG2 THR A 112      42.899  44.825  55.421  1.00 33.96           C
ATOM    860  C   THR A 112      39.683  44.926  53.274  1.00 32.86           C
ATOM    861  O   THR A 112      38.994  45.905  53.026  1.00 32.00           O
ATOM    862  N   ARG A 113      39.179  43.688  53.273  1.00 33.31           N
ATOM    863  CA  ARG A 113      37.765  43.500  52.986  1.00 33.20           C
ATOM    864  CB  ARG A 113      37.442  42.069  52.537  1.00 33.68           C
ATOM    865  CG  ARG A 113      37.880  41.853  51.054  1.00 36.43           C
ATOM    866  CD  ARG A 113      37.395  40.537  50.444  1.00 36.48           C
ATOM    867  NE  ARG A 113      37.561  39.500  51.453  1.00 39.42           N
ATOM    868  CZ  ARG A 113      38.670  38.793  51.650  1.00 41.37           C
ATOM    869  NH1 ARG A 113      39.732  38.948  50.863  1.00 40.79           N
ATOM    870  NH2 ARG A 113      38.695  37.908  52.644  1.00 42.97           N
ATOM    871  C   ARG A 113      36.862  43.997  54.086  1.00 31.87           C
ATOM    872  O   ARG A 113      35.741  44.402  53.809  1.00 30.29           O
ATOM    873  N   GLU A 114      37.358  44.027  55.332  1.00 31.22           N
ATOM    874  CA  GLU A 114      36.575  44.636  56.389  1.00 30.84           C
ATOM    875  CB  GLU A 114      37.220  44.472  57.779  1.00 31.92           C
ATOM    876  CG  GLU A 114      36.314  45.013  58.891  1.00 36.26           C
ATOM    877  CD  GLU A 114      37.027  45.251  60.213  1.00 41.84           C
ATOM    878  OE1 GLU A 114      38.025  44.540  60.507  1.00 47.72           O
ATOM    879  OE2 GLU A 114      36.587  46.160  60.965  1.00 45.31           O
ATOM    880  C   GLU A 114      36.381  46.123  56.068  1.00 28.60           C
ATOM    881  O   GLU A 114      35.311  46.662  56.297  1.00 29.55           O
ATOM    882  N   ASP A 115      37.414  46.756  55.524  1.00 27.62           N
ATOM    883  CA  ASP A 115      37.348  48.173  55.084  1.00 26.66           C
ATOM    884  CB  ASP A 115      38.715  48.633  54.587  1.00 26.67           C
ATOM    885  CG  ASP A 115      39.728  48.719  55.720  1.00 27.25           C
ATOM    886  OD1 ASP A 115      40.934  48.466  55.504  1.00 28.72           O
ATOM    887  OD2 ASP A 115      39.347  49.025  56.858  1.00 27.89           O
ATOM    888  C   ASP A 115      36.341  48.339  53.947  1.00 26.13           C
ATOM    889  O   ASP A 115      35.583  49.316  53.894  1.00 25.30           O
ATOM    890  N   PHE A 116      36.358  47.363  53.041  1.00 25.97           N
ATOM    891  CA  PHE A 116      35.481  47.370  51.875  1.00 25.03           C
ATOM    892  CB  PHE A 116      35.850  46.178  50.977  1.00 24.60           C
ATOM    893  CG  PHE A 116      35.000  46.047  49.731  1.00 23.92           C
ATOM    894  CD1 PHE A 116      35.028  47.030  48.737  1.00 23.22           C
ATOM    895  CE1 PHE A 116      34.270  46.877  47.561  1.00 22.27           C
ATOM    896  CZ  PHE A 116      33.464  45.728  47.398  1.00 24.47           C
ATOM    897  CE2 PHE A 116      33.437  44.751  48.378  1.00 22.99           C
ATOM    898  CD2 PHE A 116      34.201  44.909  49.538  1.00 24.18           C
ATOM    899  C   PHE A 116      34.037  47.297  52.336  1.00 24.82           C
ATOM    900  O   PHE A 116      33.192  48.029  51.852  1.00 24.97           O
ATOM    901  N   PHE A 117      33.752  46.414  53.300  1.00 25.30           N
ATOM    902  CA  PHE A 117      32.383  46.254  53.785  1.00 25.26           C
ATOM    903  CB  PHE A 117      32.130  44.804  54.282  1.00 25.35           C
ATOM    904  CG  PHE A 117      32.040  43.809  53.170  1.00 25.55           C
ATOM    905  CD1 PHE A 117      33.155  43.050  52.807  1.00 24.91           C
ATOM    906  CE1 PHE A 117      33.078  42.133  51.731  1.00 26.21           C
ATOM    907  CZ  PHE A 117      31.895  41.988  51.031  1.00 22.58           C
ATOM    908  CE2 PHE A 117      30.770  42.736  51.392  1.00 23.95           C
ATOM    909  CD2 PHE A 117      30.853  43.652  52.456  1.00 22.61           C
ATOM    910  C   PHE A 117      31.966  47.292  54.816  1.00 25.53           C
ATOM    911  O   PHE A 117      30.799  47.331  55.226  1.00 25.82           O
ATOM    912  N   THR A 118      32.904  48.150  55.228  1.00 25.91           N
ATOM    913  CA  THR A 118      32.540  49.257  56.107  1.00 26.02           C
ATOM    914  CB  THR A 118      33.433  49.300  57.384  1.00 25.40           C
ATOM    915  OG1 THR A 118      34.812  49.141  57.027  1.00 28.98           O
ATOM    916  CG2 THR A 118      33.155  48.081  58.276  1.00 27.43           C
ATOM    917  C   THR A 118      32.572  50.602  55.364  1.00 24.73           C
ATOM    918  O   THR A 118      31.536  51.227  55.166  1.00 25.36           O
ATOM    919  N   VAL A 119      33.763  51.019  54.981  1.00 24.11           N
ATOM    920  CA  VAL A 119      33.996  52.348  54.380  1.00 23.82           C
ATOM    921  CB  VAL A 119      35.506  52.691  54.369  1.00 24.03           C
ATOM    922  CG1 VAL A 119      35.804  54.055  53.650  1.00 23.50           C
ATOM    923  CG2 VAL A 119      36.021  52.733  55.813  1.00 23.19           C
ATOM    924  C   VAL A 119      33.378  52.428  52.973  1.00 23.33           C
ATOM    925  O   VAL A 119      32.648  53.354  52.667  1.00 22.50           O
ATOM    926  N   PHE A 120      33.661  51.451  52.125  1.00 23.36           N
ATOM    927  CA  PHE A 120      33.136  51.544  50.768  1.00 23.20           C
ATOM    928  CB  PHE A 120      33.784  50.511  49.879  1.00 23.43           C
ATOM    929  CG  PHE A 120      33.388  50.631  48.440  1.00 23.93           C
ATOM    930  CD1 PHE A 120      34.002  51.581  47.613  1.00 24.98           C
ATOM    931  CE1 PHE A 120      33.646  51.685  46.256  1.00 24.52           C
ATOM    932  CZ  PHE A 120      32.685  50.847  45.734  1.00 24.14           C
ATOM    933  CE2 PHE A 120      32.061  49.888  46.553  1.00 24.99           C
ATOM    934  CD2 PHE A 120      32.419  49.781  47.898  1.00 26.06           C
ATOM    935  C   PHE A 120      31.642  51.371  50.816  1.00 22.86           C
ATOM    936  O   PHE A 120      30.884  52.087  50.137  1.00 21.87           O
ATOM    937  N   ASP A 121      31.187  50.435  51.658  1.00 23.73           N
ATOM    938  CA  ASP A 121      29.762  50.330  51.909  1.00 23.69           C
ATOM    939  CB  ASP A 121      29.486  49.252  52.970  1.00 25.63           C
ATOM    940  CG  ASP A 121      28.009  49.111  53.296  1.00 27.41           C
ATOM    941  OD1 ASP A 121      27.418  50.057  53.873  1.00 29.38           O
ATOM    942  OD2 ASP A 121      27.373  48.060  53.033  1.00 29.79           O
ATOM    943  C   ASP A 121      29.176  51.710  52.298  1.00 23.54           C
ATOM    944  O   ASP A 121      28.193  52.163  51.707  1.00 22.27           O
ATOM    945  N   SER A 122      29.818  52.394  53.244  1.00 23.28           N
ATOM    946  CA  SER A 122      29.352  53.736  53.701  1.00 24.23           C
ATOM    947  CB  SER A 122      30.344  54.283  54.728  1.00 23.94           C
ATOM    948  OG  SER A 122      29.766  55.320  55.487  1.00 32.44           O
ATOM    949  C   SER A 122      29.251  54.757  52.570  1.00 22.40           C
ATOM    950  O   SER A 122      28.307  55.542  52.483  1.00 22.80           O
ATOM    951  N   LEU A 123      30.249  54.733  51.706  1.00 22.02           N
ATOM    952  CA  LEU A 123      30.310  55.667  50.582  1.00 21.81           C
ATOM    953  CB  LEU A 123      31.670  55.541  49.901  1.00 21.01           C
ATOM    954  CG  LEU A 123      32.843  56.111  50.697  1.00 23.70           C
ATOM    955  CD1 LEU A 123      34.177  55.799  50.016  1.00 21.71           C
ATOM    956  CD2 LEU A 123      32.654  57.628  50.963  1.00 25.53           C
ATOM    957  C   LEU A 123      29.180  55.462  49.599  1.00 21.26           C
ATOM    958  O   LEU A 123      28.595  56.426  49.113  1.00 21.46           O
ATOM    959  N   LEU A 124      28.847  54.196  49.307  1.00 21.12           N
ATOM    960  CA  LEU A 124      27.707  53.889  48.453  1.00 21.22           C
ATOM    961  CB  LEU A 124      27.581  52.367  48.258  1.00 21.08           C
ATOM    962  CG  LEU A 124      28.716  51.719  47.456  1.00 21.91           C
ATOM    963  CD1 LEU A 124      28.619  50.197  47.630  1.00 22.35           C
ATOM    964  CD2 LEU A 124      28.633  52.138  45.970  1.00 21.74           C
ATOM    965  C   LEU A 124      26.399  54.440  49.010  1.00 21.66           C
ATOM    966  O   LEU A 124      25.572  54.969  48.273  1.00 21.41           O
ATOM    967  N   ARG A 125      26.211  54.287  50.318  1.00 22.41           N
ATOM    968  CA  ARG A 125      24.986  54.685  50.969  1.00 23.22           C
ATOM    969  CB  ARG A 125      24.942  54.129  52.399  1.00 23.78           C
ATOM    970  CG  ARG A 125      24.610  52.623  52.439  1.00 24.57           C
ATOM    971  CD  ARG A 125      24.645  52.074  53.850  1.00 24.55           C
ATOM    972  NE  ARG A 125      24.786  50.615  53.882  1.00 26.24           N
ATOM    973  CZ  ARG A 125      23.782  49.738  53.861  1.00 27.02           C
ATOM    974  NH1 ARG A 125      22.517  50.142  53.789  1.00 26.06           N
ATOM    975  NH2 ARG A 125      24.063  48.437  53.892  1.00 26.10           N
ATOM    976  C   ARG A 125      24.785  56.199  50.991  1.00 24.21           C
ATOM    977  O   ARG A 125      23.665  56.666  51.171  1.00 25.21           O
ATOM    978  N   GLU A 126      25.855  56.964  50.772  1.00 25.38           N
ATOM    979  CA  GLU A 126      25.723  58.419  50.655  1.00 25.42           C
ATOM    980  CB  GLU A 126      27.079  59.107  50.737  1.00 25.77           C
ATOM    981  CG  GLU A 126      27.690  59.011  52.111  1.00 28.62           C
ATOM    982  CD  GLU A 126      29.050  59.692  52.234  1.00 34.54           C
ATOM    983  OE1 GLU A 126      29.629  60.159  51.208  1.00 32.35           O
ATOM    984  OE2 GLU A 126      29.540  59.748  53.386  1.00 36.55           O
ATOM    985  C   GLU A 126      25.022  58.830  49.375  1.00 25.31           C
ATOM    986  O   GLU A 126      24.508  59.947  49.286  1.00 25.09           O
ATOM    987  N   ARG A 127      24.987  57.931  48.386  1.00 23.61           N
ATOM    988  CA  ARG A 127      24.558  58.307  47.043  1.00 23.49           C
ATOM    989  CB  ARG A 127      25.211  57.388  45.971  1.00 22.59           C
ATOM    990  CG  ARG A 127      26.730  57.340  46.012  1.00 21.14           C
ATOM    991  CD  ARG A 127      27.409  58.733  45.755  1.00 23.68           C
ATOM    992  NE  ARG A 127      27.032  59.247  44.436  1.00 21.74           N
ATOM    993  CZ  ARG A 127      27.827  59.992  43.625  1.00 20.33           C
ATOM    994  NH1 ARG A 127      29.093  60.289  43.954  1.00 19.50           N
ATOM    995  NH2 ARG A 127      27.336  60.373  42.458  1.00 20.14           N
ATOM    996  C   ARG A 127      23.056  58.269  46.890  1.00 23.80           C
ATOM    997  O   ARG A 127      22.437  57.248  47.204  1.00 24.10           O
ATOM    998  N   LYS A 128      22.472  59.373  46.404  1.00 23.19           N
ATOM    999  CA  LYS A 128      21.058  59.424  46.026  0.50 23.25           C
ATOM   1000  CB  LYS A 128      20.680  60.822  45.545  0.50 23.63           C
ATOM   1001  CG  LYS A 128      20.742  61.861  46.642  0.50 25.16           C
ATOM   1002  CD  LYS A 128      20.726  63.263  46.064  0.50 25.78           C
ATOM   1003  CE  LYS A 128      20.510  64.271  47.183  0.50 27.66           C
ATOM   1004  NZ  LYS A 128      20.176  65.612  46.645  0.50 26.62           N
ATOM   1005  C   LYS A 128      20.692  58.413  44.948  1.00 23.07           C
ATOM   1006  O   LYS A 128      19.545  57.966  44.886  1.00 23.80           O
ATOM   1007  N   GLU A 129      21.673  58.034  44.118  1.00 21.55           N
ATOM   1008  CA  GLU A 129      21.467  57.047  43.045  1.00 22.05           C
ATOM   1009  CB  GLU A 129      22.652  57.050  42.048  1.00 21.48           C
ATOM   1010  CG  GLU A 129      22.915  58.413  41.442  1.00 22.77           C
ATOM   1011  CD  GLU A 129      24.007  59.199  42.180  1.00 24.22           C
ATOM   1012  OE1 GLU A 129      24.212  59.038  43.402  1.00 23.30           O
ATOM   1013  OE2 GLU A 129      24.677  60.020  41.510  1.00 28.18           O
ATOM   1014  C   GLU A 129      21.325  55.618  43.553  1.00 21.68           C
ATOM   1015  O   GLU A 129      20.891  54.767  42.804  1.00 21.37           O
ATOM   1016  N   LEU A 130      21.748  55.349  44.784  1.00 21.78           N
ATOM   1017  CA  LEU A 130      21.656  53.976  45.339  1.00 22.77           C
ATOM   1018  CB  LEU A 130      22.499  53.844  46.626  1.00 21.47           C
ATOM   1019  CG  LEU A 130      22.577  52.415  47.202  1.00 20.83           C
ATOM   1020  CD1 LEU A 130      23.359  51.448  46.241  1.00 17.54           C
ATOM   1021  CD2 LEU A 130      23.113  52.317  48.633  1.00 22.30           C
ATOM   1022  C   LEU A 130      20.184  53.538  45.552  1.00 24.73           C
ATOM   1023  O   LEU A 130      19.473  54.116  46.390  1.00 24.95           O
ATOM   1024  N   ASP A 131      19.729  52.538  44.793  1.00 24.79           N
ATOM   1025  CA  ASP A 131      18.361  52.037  44.902  1.00 26.82           C
ATOM   1026  CB  ASP A 131      17.856  51.556  43.546  1.00 26.88           C
ATOM   1027  CG  ASP A 131      17.981  52.607  42.456  1.00 30.41           C
ATOM   1028  OD1 ASP A 131      17.548  53.769  42.663  1.00 28.02           O
ATOM   1029  OD2 ASP A 131      18.482  52.325  41.340  1.00 29.21           O
ATOM   1030  C   ASP A 131      18.230  50.891  45.903  1.00 27.69           C
ATOM   1031  O   ASP A 131      17.246  50.815  46.675  1.00 27.78           O
ATOM   1032  N   GLU A 132      19.226  50.011  45.881  1.00 27.76           N
ATOM   1033  CA  GLU A 132      19.241  48.770  46.656  1.00 28.57           C
ATOM   1034  CB  GLU A 132      18.685  47.610  45.814  1.00 28.37           C
ATOM   1035  CG  GLU A 132      17.182  47.562  45.693  1.00 32.58           C
ATOM   1036  CD  GLU A 132      16.678  46.475  44.747  1.00 32.30           C
ATOM   1037  OE1 GLU A 132      15.490  46.574  44.333  1.00 39.17           O
ATOM   1038  OE2 GLU A 132      17.441  45.536  44.407  1.00 34.75           O
ATOM   1039  C   GLU A 132      20.664  48.424  47.015  1.00 26.71           C
ATOM   1040  O   GLU A 132      21.589  48.675  46.227  1.00 25.29           O
ATOM   1041  N   ILE A 133      20.851  47.806  48.179  1.00 24.68           N
ATOM   1042  CA  ILE A 133      22.149  47.292  48.565  1.00 24.22           C
ATOM   1043  CB  ILE A 133      22.947  48.352  49.349  1.00 23.93           C
ATOM   1044  CG1 ILE A 133      24.321  47.823  49.797  1.00 23.31           C
ATOM   1045  CD1 ILE A 133      25.361  48.946  50.096  1.00 24.87           C
ATOM   1046  CG2 ILE A 133      22.035  48.964  50.515  1.00 23.73           C
ATOM   1047  C   ILE A 133      21.966  46.013  49.375  1.00 25.45           C
ATOM   1048  O   ILE A 133      21.100  45.953  50.279  1.00 24.89           O
ATOM   1049  N   ALA A 134      22.785  45.015  49.032  1.00 25.30           N
ATOM   1050  CA  ALA A 134      22.813  43.731  49.723  1.00 25.28           C
ATOM   1051  CB  ALA A 134      21.909  42.734  48.998  1.00 25.82           C
ATOM   1052  C   ALA A 134      24.246  43.228  49.799  1.00 24.51           C
ATOM   1053  O   ALA A 134      24.732  42.611  48.844  1.00 24.97           O
ATOM   1054  N   PRO A 135      24.947  43.529  50.903  1.00 24.16           N
ATOM   1055  CA  PRO A 135      26.312  43.061  51.103  1.00 24.39           C
ATOM   1056  CB  PRO A 135      26.774  43.823  52.363  1.00 24.41           C
ATOM   1057  CG  PRO A 135      25.774  44.936  52.518  1.00 26.37           C
ATOM   1058  CD  PRO A 135      24.482  44.388  52.017  1.00 25.05           C
ATOM   1059  C   PRO A 135      26.351  41.553  51.379  1.00 24.72           C
ATOM   1060  O   PRO A 135      25.541  41.054  52.145  1.00 24.81           O
ATOM   1061  N   VAL A 136      27.297  40.856  50.778  1.00 24.28           N
ATOM   1062  CA  VAL A 136      27.428  39.424  51.020  1.00 25.09           C
ATOM   1063  CB  VAL A 136      26.956  38.595  49.809  1.00 24.49           C
ATOM   1064  CG1 VAL A 136      26.954  37.074  50.140  1.00 23.53           C
ATOM   1065  CG2 VAL A 136      25.566  39.069  49.285  1.00 25.83           C
ATOM   1066  C   VAL A 136      28.885  39.112  51.361  1.00 24.51           C
ATOM   1067  O   VAL A 136      29.598  38.601  50.520  1.00 24.82           O
ATOM   1068  N   PRO A 137      29.315  39.412  52.591  1.00 25.58           N
ATOM   1069  CA  PRO A 137      30.715  39.293  52.972  1.00 26.23           C
ATOM   1070  CB  PRO A 137      30.789  40.029  54.335  1.00 26.19           C
ATOM   1071  CG  PRO A 137      29.427  39.979  54.884  1.00 25.49           C
ATOM   1072  CD  PRO A 137      28.495  39.941  53.700  1.00 25.57           C
ATOM   1073  C   PRO A 137      31.203  37.871  53.125  1.00 27.55           C
ATOM   1074  O   PRO A 137      32.407  37.648  53.081  1.00 28.61           O
ATOM   1075  N   ASP A 138      30.278  36.939  53.322  1.00 28.13           N
ATOM   1076  CA AASP A 138      30.611  35.521  53.448  0.50 28.89           C
ATOM   1077  CA BASP A 138      30.633  35.525  53.440  0.50 28.97           C
ATOM   1078  CB AASP A 138      30.000  34.922  54.721  0.50 29.04           C
ATOM   1079  CB BASP A 138      30.113  34.919  54.755  0.50 29.17           C
ATOM   1080  CG AASP A 138      30.384  35.680  55.974  0.50 29.75           C
ATOM   1081  CG BASP A 138      31.014  33.801  55.295  0.50 30.38           C
ATOM   1082  OD1AASP A 138      31.589  35.940  56.192  0.50 31.45           O
ATOM   1083  OD1BASP A 138      31.878  33.283  54.554  0.50 32.68           O
ATOM   1084  OD2AASP A 138      29.542  36.051  56.808  0.50 33.01           O
ATOM   1085  OD2BASP A 138      30.940  33.383  56.471  0.50 31.67           O
ATOM   1086  C   ASP A 138      30.042  34.803  52.240  1.00 28.71           C
ATOM   1087  O   ASP A 138      28.882  34.340  52.269  1.00 30.35           O
ATOM   1088  N   ALA A 139      30.833  34.761  51.177  1.00 27.66           N
ATOM   1089  CA  ALA A 139      30.553  33.999  49.974  1.00 25.40           C
ATOM   1090  CB  ALA A 139      29.891  34.851  48.895  1.00 26.27           C
ATOM   1091  C   ALA A 139      31.939  33.575  49.546  1.00 24.75           C
ATOM   1092  O   ALA A 139      32.940  34.143  49.996  1.00 24.76           O
ATOM   1093  N   PHE A 140      32.002  32.561  48.694  1.00 23.36           N
ATOM   1094  CA  PHE A 140      33.252  32.127  48.070  1.00 22.50           C
ATOM   1095  CB  PHE A 140      32.898  31.141  46.953  1.00 22.93           C
ATOM   1096  CG  PHE A 140      34.037  30.279  46.500  1.00 25.70           C
ATOM   1097  CD1 PHE A 140      34.736  29.478  47.414  1.00 30.75           C
ATOM   1098  CE1 PHE A 140      35.773  28.643  46.991  1.00 31.25           C
ATOM   1099  CZ  PHE A 140      36.113  28.606  45.646  1.00 29.58           C
ATOM   1100  CE2 PHE A 140      35.415  29.383  44.717  1.00 30.07           C
ATOM   1101  CD2 PHE A 140      34.376  30.223  45.149  1.00 28.95           C
ATOM   1102  C   PHE A 140      34.028  33.334  47.499  1.00 21.32           C
ATOM   1103  O  APHE A 140      35.253  33.429  47.604  0.50 17.95           O
ATOM   1104  N   VAL A 141      33.293  34.240  46.865  1.00 20.58           N
ATOM   1105  CA AVAL A 141      33.860  35.545  46.605  0.50 20.39           C
ATOM   1106  CA BVAL A 141      33.835  35.556  46.556  0.50 20.53           C
ATOM   1107  CB AVAL A 141      34.466  35.718  45.146  0.50 21.29           C
ATOM   1108  CB BVAL A 141      34.037  35.773  45.047  0.50 21.05           C
ATOM   1109  CG1AVAL A 141      33.960  34.651  44.169  0.50 20.28           C
ATOM   1110  CG1BVAL A 141      35.051  34.728  44.477  0.50 19.13           C
ATOM   1111  CG2AVAL A 141      34.358  37.155  44.606  0.50 18.08           C
ATOM   1112  CG2BVAL A 141      32.735  35.696  44.345  0.50 21.19           C
ATOM   1113  C   VAL A 141      32.928  36.627  47.161  1.00 20.17           C
ATOM   1114  O   VAL A 141      31.810  36.852  46.678  1.00 20.06           O
ATOM   1115  N   PRO A 142      33.383  37.255  48.246  1.00 20.58           N
ATOM   1116  CA  PRO A 142      32.572  38.253  48.917  1.00 20.45           C
ATOM   1117  CB  PRO A 142      33.485  38.779  50.028  1.00 20.46           C
ATOM   1118  CG  PRO A 142      34.417  37.666  50.308  1.00 20.66           C
ATOM   1119  CD  PRO A 142      34.693  37.072  48.901  1.00 20.57           C
ATOM   1120  C   PRO A 142      32.230  39.363  47.933  1.00 20.48           C
ATOM   1121  O   PRO A 142      33.053  39.708  47.068  1.00 21.77           O
ATOM   1122  N   ILE A 143      31.027  39.883  48.059  1.00 21.15           N
ATOM   1123  CA  ILE A 143      30.494  40.846  47.096  1.00 22.13           C
ATOM   1124  CB  ILE A 143      29.735  40.055  45.977  1.00 21.65           C
ATOM   1125  CG1 ILE A 143      29.140  41.000  44.925  1.00 23.77           C
ATOM   1126  CD1 ILE A 143      28.618  40.281  43.726  1.00 26.07           C
ATOM   1127  CG2 ILE A 143      28.626  39.176  46.590  1.00 22.37           C
ATOM   1128  C   ILE A 143      29.528  41.797  47.782  1.00 22.65           C
ATOM   1129  O   ILE A 143      28.819  41.423  48.737  1.00 21.54           O
ATOM   1130  N   ILE A 144      29.503  43.042  47.306  1.00 21.65           N
ATOM   1131  CA  ILE A 144      28.368  43.921  47.575  1.00 21.91           C
ATOM   1132  CB  ILE A 144      28.826  45.351  48.016  1.00 21.46           C
ATOM   1133  CG1 ILE A 144      29.789  45.267  49.217  1.00 21.92           C
ATOM   1134  CD1 ILE A 144      30.528  46.596  49.521  1.00 22.67           C
ATOM   1135  CG2 ILE A 144      27.629  46.184  48.329  1.00 21.81           C
ATOM   1136  C   ILE A 144      27.570  44.005  46.287  1.00 21.68           C
ATOM   1137  O   ILE A 144      28.099  44.445  45.251  1.00 21.53           O
ATOM   1138  N   LYS A 145      26.311  43.574  46.351  1.00 22.17           N
ATOM   1139  CA  LYS A 145      25.371  43.693  45.235  1.00 24.13           C
ATOM   1140  CB  LYS A 145      24.398  42.489  45.202  1.00 24.24           C
ATOM   1141  CG  LYS A 145      25.076  41.145  44.860  1.00 27.42           C
ATOM   1142  CD  LYS A 145      24.232  39.891  45.172  1.00 27.20           C
ATOM   1143  CE  LYS A 145      25.102  38.582  44.923  1.00 30.98           C
ATOM   1144  NZ  LYS A 145      24.502  37.193  45.247  1.00 31.30           N
ATOM   1145  C   LYS A 145      24.593  44.987  45.449  1.00 24.13           C
ATOM   1146  O   LYS A 145      24.108  45.231  46.557  1.00 24.43           O
ATOM   1147  N   ILE A 146      24.501  45.824  44.412  1.00 23.12           N
ATOM   1148  CA  ILE A 146      23.692  47.044  44.471  1.00 21.73           C
ATOM   1149  CB  ILE A 146      24.570  48.332  44.731  1.00 22.39           C
ATOM   1150  CG1 ILE A 146      25.468  48.642  43.499  1.00 21.27           C
ATOM   1151  CD1 ILE A 146      26.176  50.008  43.553  1.00 20.76           C
ATOM   1152  CG2 ILE A 146      25.400  48.225  46.042  1.00 21.55           C
ATOM   1153  C   ILE A 146      22.871  47.224  43.198  1.00 22.04           C
ATOM   1154  O   ILE A 146      23.121  46.589  42.143  1.00 20.91           O
ATOM   1155  N   LYS A 147      21.868  48.073  43.300  1.00 21.42           N
ATOM   1156  CA  LYS A 147      21.215  48.633  42.118  1.00 22.09           C
ATOM   1157  CB  LYS A 147      19.735  48.283  42.065  1.00 22.76           C
ATOM   1158  CG  LYS A 147      19.020  48.822  40.859  1.00 27.40           C
ATOM   1159  CD  LYS A 147      17.582  48.382  40.822  1.00 33.71           C
ATOM   1160  CE  LYS A 147      17.475  46.871  40.663  1.00 37.30           C
ATOM   1161  NZ  LYS A 147      16.051  46.432  40.460  1.00 42.93           N
ATOM   1162  C   LYS A 147      21.417  50.136  42.218  1.00 21.98           C
ATOM   1163  O   LYS A 147      21.087  50.738  43.239  1.00 22.49           O
ATOM   1164  N   PHE A 148      21.960  50.729  41.160  1.00 21.33           N
ATOM   1165  CA  PHE A 148      22.461  52.113  41.217  1.00 21.85           C
ATOM   1166  CB  PHE A 148      23.985  52.064  41.368  1.00 22.44           C
ATOM   1167  CG  PHE A 148      24.645  53.375  41.750  1.00 24.80           C
ATOM   1168  CD1 PHE A 148      24.914  53.677  43.094  1.00 23.22           C
ATOM   1169  CE1 PHE A 148      25.560  54.857  43.455  1.00 25.31           C
ATOM   1170  CZ  PHE A 148      25.983  55.756  42.468  1.00 26.05           C
ATOM   1171  CE2 PHE A 148      25.733  55.475  41.123  1.00 26.18           C
ATOM   1172  CD2 PHE A 148      25.085  54.264  40.761  1.00 27.00           C
ATOM   1173  C   PHE A 148      22.009  52.788  39.913  1.00 21.82           C
ATOM   1174  O   PHE A 148      22.320  52.303  38.800  1.00 21.49           O
ATOM   1175  N   SER A 149      21.241  53.877  40.026  1.00 21.24           N
ATOM   1176  CA  SER A 149      20.627  54.479  38.839  1.00 21.75           C
ATOM   1177  CB  SER A 149      21.683  55.251  38.023  1.00 21.02           C
ATOM   1178  OG  SER A 149      22.254  56.299  38.796  1.00 21.49           O
ATOM   1179  C   SER A 149      19.941  53.409  37.993  1.00 22.55           C
ATOM   1180  O   SER A 149      20.007  53.434  36.769  1.00 23.44           O
ATOM   1181  N   GLY A 150      19.279  52.464  38.682  1.00 22.09           N
ATOM   1182  CA  GLY A 150      18.477  51.432  38.045  1.00 22.83           C
ATOM   1183  C   GLY A 150      19.289  50.284  37.459  1.00 22.85           C
ATOM   1184  O   GLY A 150      18.727  49.354  36.908  1.00 23.50           O
ATOM   1185  N   ILE A 151      20.616  50.352  37.559  1.00 21.50           N
ATOM   1186  CA  ILE A 151      21.490  49.332  36.967  1.00 21.06           C
ATOM   1187  CB  ILE A 151      22.672  50.004  36.180  1.00 20.23           C
ATOM   1188  CG1 ILE A 151      22.133  50.940  35.069  1.00 21.13           C
ATOM   1189  CD1 ILE A 151      23.173  51.932  34.512  1.00 21.45           C
ATOM   1190  CG2 ILE A 151      23.576  48.913  35.595  1.00 22.89           C
ATOM   1191  C   ILE A 151      22.047  48.421  38.053  1.00 19.89           C
ATOM   1192  O   ILE A 151      22.551  48.913  39.073  1.00 19.44           O
ATOM   1193  N   SER A 152      21.951  47.097  37.849  1.00 19.65           N
ATOM   1194  CA  SER A 152      22.565  46.134  38.771  1.00 19.29           C
ATOM   1195  CB  SER A 152      22.070  44.687  38.542  1.00 21.19           C
ATOM   1196  OG  SER A 152      20.666  44.572  38.738  1.00 23.70           O
ATOM   1197  C   SER A 152      24.071  46.163  38.653  1.00 19.40           C
ATOM   1198  O   SER A 152      24.631  46.027  37.537  1.00 18.08           O
ATOM   1199  N   ILE A 153      24.727  46.295  39.803  1.00 18.04           N
ATOM   1200  CA  ILE A 153      26.174  46.289  39.890  1.00 19.05           C
ATOM   1201  CB  ILE A 153      26.763  47.668  40.394  1.00 19.25           C
ATOM   1202  CG1 ILE A 153      26.074  48.880  39.749  1.00 21.02           C
ATOM   1203  CD1 ILE A 153      26.123  48.927  38.219  1.00 19.56           C
ATOM   1204  CG2 ILE A 153      28.283  47.686  40.193  1.00 19.17           C
ATOM   1205  C   ILE A 153      26.608  45.215  40.867  1.00 19.10           C
ATOM   1206  O   ILE A 153      26.018  45.068  41.966  1.00 19.23           O
ATOM   1207  N   ALA A 154      27.638  44.478  40.486  1.00 18.25           N
ATOM   1208  CA  ALA A 154      28.256  43.535  41.408  1.00 19.63           C
ATOM   1209  CB  ALA A 154      28.283  42.128  40.798  1.00 19.73           C
ATOM   1210  C   ALA A 154      29.653  44.030  41.729  1.00 20.31           C
ATOM   1211  O   ALA A 154      30.491  44.198  40.832  1.00 20.56           O
ATOM   1212  N   LEU A 155      29.911  44.300  43.002  1.00 20.48           N
ATOM   1213  CA  LEU A 155      31.199  44.842  43.389  1.00 21.26           C
ATOM   1214  CB  LEU A 155      30.987  46.160  44.156  1.00 22.21           C
ATOM   1215  CG  LEU A 155      30.588  47.281  43.198  1.00 23.35           C
ATOM   1216  CD1 LEU A 155      29.480  48.136  43.822  1.00 24.32           C
ATOM   1217  CD2 LEU A 155      31.854  48.080  42.798  1.00 23.54           C
ATOM   1218  C   LEU A 155      31.994  43.882  44.254  1.00 21.09           C
ATOM   1219  O   LEU A 155      31.518  43.453  45.308  1.00 20.82           O
ATOM   1220  N   ILE A 156      33.203  43.573  43.807  1.00 20.65           N
ATOM   1221  CA  ILE A 156      34.147  42.766  44.568  1.00 22.60           C
ATOM   1222  CB  ILE A 156      34.333  41.354  43.887  1.00 22.71           C
ATOM   1223  CG1 ILE A 156      35.109  41.469  42.560  1.00 23.03           C
ATOM   1224  CD1 ILE A 156      35.497  40.081  41.898  1.00 22.73           C
ATOM   1225  CG2 ILE A 156      32.942  40.710  43.746  1.00 22.29           C
ATOM   1226  C   ILE A 156      35.435  43.546  44.725  1.00 23.35           C
ATOM   1227  O   ILE A 156      35.633  44.593  44.071  1.00 21.90           O
ATOM   1228  N   CYS A 157      36.309  43.064  45.612  1.00 25.07           N
ATOM   1229  CA  CYS A 157      37.482  43.826  45.990  1.00 25.64           C
ATOM   1230  CB  CYS A 157      37.193  44.554  47.309  1.00 26.28           C
ATOM   1231  SG  CYS A 157      38.547  45.592  47.888  1.00 29.72           S
ATOM   1232  C   CYS A 157      38.699  42.927  46.120  1.00 25.89           C
ATOM   1233  O   CYS A 157      38.648  41.872  46.783  1.00 25.53           O
ATOM   1234  N   ALA A 158      39.776  43.294  45.445  1.00 25.13           N
ATOM   1235  CA  ALA A 158      40.998  42.513  45.549  1.00 27.04           C
ATOM   1236  CB  ALA A 158      41.439  42.021  44.211  1.00 26.31           C
ATOM   1237  C   ALA A 158      42.075  43.379  46.163  1.00 28.15           C
ATOM   1238  O   ALA A 158      42.305  44.510  45.723  1.00 27.57           O
ATOM   1239  N   ARG A 159      42.723  42.838  47.188  1.00 30.18           N
ATOM   1240  CA  ARG A 159      43.831  43.519  47.837  1.00 32.77           C
ATOM   1241  CB  ARG A 159      43.736  43.346  49.355  1.00 33.65           C
ATOM   1242  CG  ARG A 159      44.850  44.003  50.126  1.00 36.08           C
ATOM   1243  CD  ARG A 159      44.590  44.006  51.616  1.00 39.36           C
ATOM   1244  NE  ARG A 159      44.439  42.668  52.175  1.00 42.50           N
ATOM   1245  CZ  ARG A 159      45.443  41.947  52.671  1.00 45.19           C
ATOM   1246  NH1 ARG A 159      46.687  42.420  52.661  1.00 46.41           N
ATOM   1247  NH2 ARG A 159      45.206  40.740  53.167  1.00 45.74           N
ATOM   1248  C   ARG A 159      45.144  42.974  47.323  1.00 33.64           C
ATOM   1249  O   ARG A 159      45.441  41.777  47.490  1.00 34.83           O
ATOM   1250  N   LEU A 160      45.916  43.860  46.708  1.00 34.32           N
ATOM   1251  CA  LEU A 160      47.239  43.545  46.189  1.00 34.51           C
ATOM   1252  CB  LEU A 160      47.575  44.450  45.011  1.00 33.87           C
ATOM   1253  CG  LEU A 160      46.822  44.328  43.666  1.00 31.41           C
ATOM   1254  CD1 LEU A 160      47.443  45.226  42.626  1.00 28.64           C
ATOM   1255  CD2 LEU A 160      46.816  42.912  43.162  1.00 30.43           C
ATOM   1256  C   LEU A 160      48.320  43.693  47.277  1.00 36.62           C
ATOM   1257  O   LEU A 160      48.174  44.505  48.215  1.00 36.66           O
ATOM   1258  N   ASP A 161      49.406  42.928  47.145  1.00 38.13           N
ATOM   1259  CA  ASP A 161      50.512  43.041  48.103  1.00 40.27           C
ATOM   1260  CB  ASP A 161      51.193  41.692  48.354  1.00 40.88           C
ATOM   1261  CG  ASP A 161      52.289  41.795  49.404  1.00 44.56           C
ATOM   1262  OD1 ASP A 161      51.980  42.258  50.532  1.00 47.17           O
ATOM   1263  OD2 ASP A 161      53.482  41.476  49.175  1.00 48.36           O
ATOM   1264  C   ASP A 161      51.536  44.089  47.673  1.00 40.62           C
ATOM   1265  O   ASP A 161      52.688  43.765  47.368  1.00 42.09           O
ATOM   1266  N   GLN A 162      51.096  45.343  47.641  1.00 40.52           N
ATOM   1267  CA  GLN A 162      51.936  46.492  47.317  1.00 40.19           C
ATOM   1268  CB  GLN A 162      52.139  46.638  45.806  1.00 40.58           C
ATOM   1269  CG  GLN A 162      50.860  46.828  44.980  1.00 40.15           C
ATOM   1270  CD  GLN A 162      51.154  46.755  43.501  1.00 40.14           C
ATOM   1271  OE1 GLN A 162      51.086  47.764  42.795  1.00 41.36           O
ATOM   1272  NE2 GLN A 162      51.513  45.564  43.029  1.00 39.43           N
ATOM   1273  C   GLN A 162      51.285  47.736  47.927  1.00 39.91           C
ATOM   1274  O   GLN A 162      50.065  47.750  48.118  1.00 40.57           O
ATOM   1275  N   PRO A 163      52.085  48.747  48.278  1.00 39.49           N
ATOM   1276  CA  PRO A 163      51.572  49.920  49.002  1.00 38.58           C
ATOM   1277  CB  PRO A 163      52.852  50.634  49.456  1.00 38.50           C
ATOM   1278  CG  PRO A 163      53.894  50.224  48.462  1.00 39.76           C
ATOM   1279  CD  PRO A 163      53.542  48.834  48.047  1.00 39.29           C
ATOM   1280  C   PRO A 163      50.696  50.878  48.169  1.00 37.52           C
ATOM   1281  O   PRO A 163      49.952  51.666  48.743  1.00 36.86           O
ATOM   1282  N   GLN A 164      50.808  50.819  46.841  1.00 36.92           N
ATOM   1283  CA  GLN A 164      50.077  51.735  45.947  1.00 36.39           C
ATOM   1284  CB  GLN A 164      51.019  52.809  45.425  1.00 36.69           C
ATOM   1285  CG  GLN A 164      51.653  53.688  46.500  1.00 40.07           C
ATOM   1286  CD  GLN A 164      52.744  54.557  45.937  1.00 43.53           C
ATOM   1287  OE1 GLN A 164      53.407  54.170  44.979  1.00 46.40           O
ATOM   1288  NE2 GLN A 164      52.945  55.735  46.528  1.00 45.12           N
ATOM   1289  C   GLN A 164      49.435  51.041  44.733  1.00 35.12           C
ATOM   1290  O   GLN A 164      50.051  50.180  44.124  1.00 35.35           O
ATOM   1291  N   VAL A 165      48.213  51.448  44.375  1.00 33.55           N
ATOM   1292  CA  VAL A 165      47.571  50.978  43.130  1.00 31.74           C
ATOM   1293  CB  VAL A 165      46.240  50.207  43.403  1.00 31.61           C
ATOM   1294  CG1 VAL A 165      45.575  49.775  42.082  1.00 29.79           C
ATOM   1295  CG2 VAL A 165      46.476  48.998  44.326  1.00 31.09           C
ATOM   1296  C   VAL A 165      47.345  52.173  42.182  1.00 31.41           C
ATOM   1297  O   VAL A 165      46.375  52.925  42.330  1.00 30.64           O
ATOM   1298  N   PRO A 166      48.237  52.368  41.212  1.00 31.12           N
ATOM   1299  CA  PRO A 166      48.092  53.482  40.286  1.00 30.21           C
ATOM   1300  CB  PRO A 166      49.423  53.518  39.522  1.00 30.78           C
ATOM   1301  CG  PRO A 166      50.228  52.367  39.999  1.00 31.54           C
ATOM   1302  CD  PRO A 166      49.397  51.516  40.896  1.00 31.98           C
ATOM   1303  C   PRO A 166      46.951  53.212  39.316  1.00 29.18           C
ATOM   1304  O   PRO A 166      46.598  52.040  39.076  1.00 26.87           O
ATOM   1305  N   LEU A 167      46.383  54.288  38.781  1.00 28.64           N
ATOM   1306  CA  LEU A 167      45.317  54.179  37.784  1.00 28.65           C
ATOM   1307  CB  LEU A 167      44.798  55.563  37.400  1.00 28.41           C
ATOM   1308  CG  LEU A 167      43.973  56.202  38.530  1.00 29.37           C
ATOM   1309  CD1 LEU A 167      43.844  57.737  38.368  1.00 29.28           C
ATOM   1310  CD2 LEU A 167      42.612  55.554  38.578  1.00 27.08           C
ATOM   1311  C   LEU A 167      45.727  53.385  36.545  1.00 29.17           C
ATOM   1312  O   LEU A 167      44.902  52.758  35.901  1.00 28.20           O
ATOM   1313  N   SER A 168      47.006  53.442  36.210  1.00 30.48           N
ATOM   1314  CA  SER A 168      47.548  52.789  35.018  1.00 31.52           C
ATOM   1315  CB  SER A 168      48.829  53.504  34.592  1.00 31.78           C
ATOM   1316  OG  SER A 168      49.764  53.447  35.657  1.00 33.19           O
ATOM   1317  C   SER A 168      47.848  51.291  35.177  1.00 32.27           C
ATOM   1318  O   SER A 168      48.237  50.645  34.196  1.00 32.80           O
ATOM   1319  N   LEU A 169      47.643  50.743  36.376  1.00 33.27           N
ATOM   1320  CA  LEU A 169      47.947  49.338  36.671  1.00 33.86           C
ATOM   1321  CB  LEU A 169      47.746  49.043  38.165  1.00 34.02           C
ATOM   1322  CG  LEU A 169      48.156  47.669  38.726  1.00 34.94           C
ATOM   1323  CD1 LEU A 169      49.009  47.849  39.971  1.00 37.73           C
ATOM   1324  CD2 LEU A 169      46.945  46.811  39.033  1.00 37.54           C
ATOM   1325  C   LEU A 169      47.141  48.355  35.798  1.00 34.65           C
ATOM   1326  O   LEU A 169      45.930  48.498  35.658  1.00 33.80           O
ATOM   1327  N   THR A 170      47.828  47.368  35.219  1.00 35.21           N
ATOM   1328  CA  THR A 170      47.165  46.235  34.528  1.00 36.66           C
ATOM   1329  CB  THR A 170      47.608  46.147  33.060  1.00 37.11           C
ATOM   1330  OG1 THR A 170      49.024  45.992  33.027  1.00 38.19           O
ATOM   1331  CG2 THR A 170      47.363  47.477  32.319  1.00 37.78           C
ATOM   1332  C   THR A 170      47.467  44.910  35.248  1.00 36.99           C
ATOM   1333  O   THR A 170      48.219  44.901  36.224  1.00 36.51           O
ATOM   1334  N   LEU A 171      46.918  43.794  34.749  1.00 37.93           N
ATOM   1335  CA  LEU A 171      46.901  42.526  35.501  1.00 39.13           C
ATOM   1336  CB  LEU A 171      45.464  42.334  36.043  1.00 38.18           C
ATOM   1337  CG  LEU A 171      44.598  43.288  36.857  1.00 35.76           C
ATOM   1338  CD1 LEU A 171      43.277  42.606  37.125  1.00 33.92           C
ATOM   1339  CD2 LEU A 171      45.274  43.696  38.170  1.00 31.35           C
ATOM   1340  C   LEU A 171      47.185  41.113  34.896  1.00 41.50           C
ATOM   1341  O   LEU A 171      46.849  40.188  35.613  1.00 41.59           O
ATOM   1342  N   SER A 172      47.858  40.748  33.796  1.00 43.84           N
ATOM   1343  CA ASER A 172      49.062  41.285  33.180  0.50 44.94           C
ATOM   1344  CA BSER A 172      49.067  41.314  33.206  0.50 44.92           C
ATOM   1345  CB ASER A 172      49.267  42.789  33.333  0.50 45.15           C
ATOM   1346  CB BSER A 172      49.272  42.814  33.471  0.50 45.13           C
ATOM   1347  OG ASER A 172      50.320  43.216  32.483  0.50 45.45           O
ATOM   1348  OG BSER A 172      49.999  43.066  34.671  0.50 45.32           O
ATOM   1349  C   SER A 172      50.212  40.459  33.774  1.00 45.47           C
ATOM   1350  O   SER A 172      50.466  39.337  33.312  1.00 45.37           O
ATOM   1351  N   ASP A 173      50.859  40.982  34.812  1.00 46.03           N
ATOM   1352  CA  ASP A 173      51.990  40.346  35.455  1.00 46.58           C
ATOM   1353  CB  ASP A 173      52.866  41.445  36.065  1.00 47.10           C
ATOM   1354  CG  ASP A 173      54.024  40.905  36.886  1.00 48.53           C
ATOM   1355  OD1 ASP A 173      54.381  39.715  36.734  1.00 49.17           O
ATOM   1356  OD2 ASP A 173      54.634  41.623  37.713  1.00 51.50           O
ATOM   1357  C   ASP A 173      51.539  39.318  36.508  1.00 46.71           C
ATOM   1358  O   ASP A 173      50.946  39.680  37.540  1.00 46.28           O
ATOM   1359  N   LYS A 174      51.835  38.043  36.243  1.00 46.60           N
ATOM   1360  CA  LYS A 174      51.476  36.941  37.148  1.00 46.95           C
ATOM   1361  CB  LYS A 174      51.813  35.574  36.534  1.00 47.07           C
ATOM   1362  CG  LYS A 174      50.609  34.877  35.898  1.00 48.11           C
ATOM   1363  CD  LYS A 174      50.981  33.564  35.216  1.00 48.57           C
ATOM   1364  CE  LYS A 174      51.404  33.766  33.757  1.00 51.07           C
ATOM   1365  NZ  LYS A 174      50.224  33.847  32.820  1.00 52.62           N
ATOM   1366  C   LYS A 174      52.073  37.064  38.550  1.00 46.11           C
ATOM   1367  O   LYS A 174      51.530  36.495  39.502  1.00 45.53           O
ATOM   1368  N   ASN A 175      53.168  37.822  38.664  1.00 45.77           N
ATOM   1369  CA  ASN A 175      53.796  38.150  39.953  1.00 45.54           C
ATOM   1370  CB  ASN A 175      55.030  39.048  39.755  1.00 46.09           C
ATOM   1371  CG  ASN A 175      56.262  38.278  39.254  1.00 47.73           C
ATOM   1372  OD1 ASN A 175      56.235  37.051  39.099  1.00 48.03           O
ATOM   1373  ND2 ASN A 175      57.353  39.006  39.012  1.00 49.66           N
ATOM   1374  C   ASN A 175      52.856  38.816  40.958  1.00 44.69           C
ATOM   1375  O   ASN A 175      53.051  38.683  42.168  1.00 44.15           O
ATOM   1376  N   LEU A 176      51.850  39.534  40.448  1.00 43.67           N
ATOM   1377  CA  LEU A 176      50.869  40.232  41.283  1.00 42.84           C
ATOM   1378  CB  LEU A 176      49.956  41.118  40.422  1.00 43.27           C
ATOM   1379  CG  LEU A 176      50.513  42.321  39.648  1.00 43.59           C
ATOM   1380  CD1 LEU A 176      49.525  42.762  38.584  1.00 43.29           C
ATOM   1381  CD2 LEU A 176      50.833  43.483  40.569  1.00 43.54           C
ATOM   1382  C   LEU A 176      50.021  39.261  42.104  1.00 42.40           C
ATOM   1383  O   LEU A 176      49.420  39.640  43.117  1.00 42.35           O
ATOM   1384  N   LEU A 177      49.985  38.005  41.668  1.00 41.50           N
ATOM   1385  CA  LEU A 177      49.197  36.973  42.325  1.00 41.51           C
ATOM   1386  CB  LEU A 177      48.771  35.921  41.302  1.00 41.49           C
ATOM   1387  CG  LEU A 177      48.032  36.424  40.059  1.00 41.74           C
ATOM   1388  CD1 LEU A 177      48.044  35.333  38.998  1.00 41.97           C
ATOM   1389  CD2 LEU A 177      46.608  36.838  40.426  1.00 41.33           C
ATOM   1390  C   LEU A 177      49.931  36.285  43.471  1.00 41.76           C
ATOM   1391  O   LEU A 177      49.321  35.518  44.219  1.00 41.03           O
ATOM   1392  N   ARG A 178      51.231  36.548  43.604  1.00 42.66           N
ATOM   1393  CA  ARG A 178      52.041  35.886  44.647  1.00 44.11           C
ATOM   1394  CB  ARG A 178      53.492  36.364  44.617  1.00 44.50           C
ATOM   1395  CG  ARG A 178      54.427  35.431  43.858  1.00 48.12           C
ATOM   1396  CD  ARG A 178      55.884  35.631  44.212  1.00 52.69           C
ATOM   1397  NE  ARG A 178      56.204  37.057  44.210  1.00 57.90           N
ATOM   1398  CZ  ARG A 178      56.457  37.772  43.116  1.00 59.63           C
ATOM   1399  NH1 ARG A 178      56.459  37.185  41.922  1.00 60.48           N
ATOM   1400  NH2 ARG A 178      56.724  39.073  43.219  1.00 60.39           N
ATOM   1401  C   ARG A 178      51.487  36.040  46.061  1.00 43.59           C
ATOM   1402  O   ARG A 178      51.212  37.158  46.512  1.00 44.33           O
ATOM   1403  N   ASN A 179      51.318  34.904  46.741  1.00 43.26           N
ATOM   1404  CA  ASN A 179      50.929  34.864  48.155  1.00 42.58           C
ATOM   1405  CB  ASN A 179      52.000  35.545  49.045  1.00 43.72           C
ATOM   1406  CG  ASN A 179      53.425  35.225  48.602  1.00 45.92           C
ATOM   1407  OD1 ASN A 179      53.783  34.054  48.410  1.00 48.87           O
ATOM   1408  ND2 ASN A 179      54.243  36.268  48.424  1.00 46.52           N
ATOM   1409  C   ASN A 179      49.539  35.434  48.494  1.00 41.29           C
ATOM   1410  O   ASN A 179      49.194  35.550  49.673  1.00 41.46           O
ATOM   1411  N   LEU A 180      48.741  35.774  47.481  1.00 38.99           N
ATOM   1412  CA  LEU A 180      47.439  36.372  47.725  1.00 37.14           C
ATOM   1413  CB  LEU A 180      46.861  36.931  46.420  1.00 37.34           C
ATOM   1414  CG  LEU A 180      47.603  38.126  45.793  1.00 37.15           C
ATOM   1415  CD1 LEU A 180      46.802  38.652  44.622  1.00 38.77           C
ATOM   1416  CD2 LEU A 180      47.855  39.248  46.799  1.00 38.14           C
ATOM   1417  C   LEU A 180      46.463  35.386  48.369  1.00 36.11           C
ATOM   1418  O   LEU A 180      46.513  34.195  48.073  1.00 35.24           O
ATOM   1419  N   ASP A 181      45.596  35.891  49.250  1.00 35.37           N
ATOM   1420  CA  ASP A 181      44.446  35.136  49.748  1.00 35.45           C
ATOM   1421  CB  ASP A 181      43.506  36.035  50.566  1.00 35.94           C
ATOM   1422  CG  ASP A 181      43.894  36.136  52.038  1.00 38.57           C
ATOM   1423  OD1 ASP A 181      44.926  35.568  52.440  1.00 40.22           O
ATOM   1424  OD2 ASP A 181      43.202  36.762  52.871  1.00 39.75           O
ATOM   1425  C   ASP A 181      43.663  34.565  48.560  1.00 35.03           C
ATOM   1426  O   ASP A 181      43.625  35.175  47.484  1.00 34.23           O
ATOM   1427  N   GLU A 182      43.030  33.410  48.773  1.00 34.47           N
ATOM   1428  CA AGLU A 182      42.261  32.739  47.729  0.25 34.20           C
ATOM   1429  CA BGLU A 182      42.267  32.742  47.724  0.25 34.11           C
ATOM   1430  CA CGLU A 182      42.254  32.733  47.730  0.50 34.60           C
ATOM   1431  CB AGLU A 182      41.692  31.424  48.266  0.25 34.30           C
ATOM   1432  CB BGLU A 182      41.725  31.406  48.242  0.25 34.18           C
ATOM   1433  CB CGLU A 182      41.682  31.406  48.262  0.50 34.68           C
ATOM   1434  CG AGLU A 182      41.700  30.292  47.257  0.25 34.37           C
ATOM   1435  CG BGLU A 182      41.630  30.331  47.174  0.25 33.84           C
ATOM   1436  CG CGLU A 182      40.725  31.559  49.435  0.50 35.18           C
ATOM   1437  CD AGLU A 182      41.148  29.001  47.827  0.25 34.23           C
ATOM   1438  CD BGLU A 182      41.992  28.947  47.687  0.25 33.35           C
ATOM   1439  CD CGLU A 182      40.064  30.261  49.826  0.50 35.98           C
ATOM   1440  OE1AGLU A 182      39.947  28.971  48.172  0.25 34.15           O
ATOM   1441  OE1BGLU A 182      41.654  28.616  48.846  0.25 32.50           O
ATOM   1442  OE1CGLU A 182      40.695  29.483  50.577  0.50 36.51           O
ATOM   1443  OE2AGLU A 182      41.915  28.017  47.921  0.25 33.42           O
ATOM   1444  OE2BGLU A 182      42.617  28.190  46.919  0.25 32.37           O
ATOM   1445  OE2CGLU A 182      38.910  30.032  49.389  0.50 38.59           O
ATOM   1446  C   GLU A 182      41.139  33.631  47.185  1.00 34.03           C
ATOM   1447  O   GLU A 182      40.914  33.692  45.967  1.00 33.94           O
ATOM   1448  N   LYS A 183      40.439  34.319  48.092  1.00 33.15           N
ATOM   1449  CA  LYS A 183      39.348  35.230  47.738  1.00 32.57           C
ATOM   1450  CB  LYS A 183      38.661  35.759  48.998  1.00 32.99           C
ATOM   1451  CG  LYS A 183      37.672  34.799  49.600  1.00 32.99           C
ATOM   1452  CD  LYS A 183      37.396  35.166  51.037  1.00 35.85           C
ATOM   1453  CE  LYS A 183      36.076  34.596  51.565  1.00 40.74           C
ATOM   1454  NZ  LYS A 183      35.813  33.181  51.172  1.00 44.86           N
ATOM   1455  C   LYS A 183      39.786  36.390  46.838  1.00 32.41           C
ATOM   1456  O   LYS A 183      39.010  36.832  45.964  1.00 31.48           O
ATOM   1457  N   ASP A 184      41.013  36.879  47.036  1.00 31.48           N
ATOM   1458  CA AASP A 184      41.608  37.964  46.231  0.50 31.01           C
ATOM   1459  CA BASP A 184      41.439  37.974  46.176  0.50 31.85           C
ATOM   1460  CB AASP A 184      42.786  38.578  46.983  0.50 30.99           C
ATOM   1461  CB BASP A 184      42.205  39.066  46.941  0.50 32.80           C
ATOM   1462  CG AASP A 184      42.356  39.301  48.252  0.50 30.05           C
ATOM   1463  CG BASP A 184      43.670  38.788  47.053  0.50 34.31           C
ATOM   1464  OD1AASP A 184      41.536  40.239  48.171  0.50 27.86           O
ATOM   1465  OD1BASP A 184      44.248  39.072  48.129  0.50 36.74           O
ATOM   1466  OD2AASP A 184      42.791  38.995  49.382  0.50 29.99           O
ATOM   1467  OD2BASP A 184      44.324  38.304  46.113  0.50 37.33           O
ATOM   1468  C   ASP A 184      42.077  37.501  44.852  1.00 30.96           C
ATOM   1469  O   ASP A 184      42.019  38.234  43.869  1.00 29.44           O
ATOM   1470  N   LEU A 185      42.603  36.270  44.804  1.00 29.95           N
ATOM   1471  CA  LEU A 185      43.012  35.653  43.525  1.00 29.41           C
ATOM   1472  CB  LEU A 185      43.644  34.272  43.737  1.00 30.36           C
ATOM   1473  CG  LEU A 185      44.999  34.120  44.416  1.00 31.55           C
ATOM   1474  CD1 LEU A 185      45.169  32.641  44.779  1.00 32.34           C
ATOM   1475  CD2 LEU A 185      46.131  34.578  43.504  1.00 32.73           C
ATOM   1476  C   LEU A 185      41.798  35.459  42.629  1.00 28.47           C
ATOM   1477  O   LEU A 185      41.859  35.767  41.430  1.00 28.45           O
ATOM   1478  N   ARG A 186      40.709  34.956  43.220  1.00 27.30           N
ATOM   1479  CA  ARG A 186      39.457  34.754  42.487  1.00 27.93           C
ATOM   1480  CB  ARG A 186      38.383  34.097  43.352  1.00 27.83           C
ATOM   1481  CG  ARG A 186      38.616  32.625  43.541  1.00 29.66           C
ATOM   1482  CD  ARG A 186      37.401  31.920  44.049  1.00 32.51           C
ATOM   1483  NE  ARG A 186      37.133  32.118  45.481  1.00 33.05           N
ATOM   1484  CZ  ARG A 186      37.733  31.414  46.455  1.00 32.21           C
ATOM   1485  NH1 ARG A 186      38.649  30.526  46.137  1.00 30.64           N
ATOM   1486  NH2 ARG A 186      37.408  31.590  47.732  1.00 29.22           N
ATOM   1487  C   ARG A 186      38.962  36.105  41.976  1.00 26.54           C
ATOM   1488  O   ARG A 186      38.581  36.236  40.808  1.00 26.15           O
ATOM   1489  N   ALA A 187      39.005  37.110  42.848  1.00 25.67           N
ATOM   1490  CA  ALA A 187      38.616  38.473  42.464  1.00 25.60           C
ATOM   1491  CB  ALA A 187      38.687  39.429  43.668  1.00 25.14           C
ATOM   1492  C   ALA A 187      39.391  39.021  41.269  1.00 24.97           C
ATOM   1493  O   ALA A 187      38.769  39.444  40.268  1.00 23.64           O
ATOM   1494  N   LEU A 188      40.721  39.005  41.344  1.00 24.41           N
ATOM   1495  CA  LEU A 188      41.531  39.508  40.236  1.00 25.05           C
ATOM   1496  CB  LEU A 188      43.013  39.463  40.571  1.00 26.09           C
ATOM   1497  CG  LEU A 188      43.514  40.438  41.636  1.00 27.04           C
ATOM   1498  CD1 LEU A 188      44.965  40.097  41.960  1.00 30.08           C
ATOM   1499  CD2 LEU A 188      43.375  41.908  41.157  1.00 23.37           C
ATOM   1500  C   LEU A 188      41.288  38.710  38.963  1.00 24.45           C
ATOM   1501  O   LEU A 188      41.375  39.237  37.846  1.00 23.63           O
ATOM   1502  N   ASN A 189      41.001  37.425  39.144  1.00 23.88           N
ATOM   1503  CA  ASN A 189      40.792  36.565  37.991  1.00 22.96           C
ATOM   1504  CB  ASN A 189      41.065  35.108  38.306  1.00 23.16           C
ATOM   1505  CG  ASN A 189      42.546  34.769  38.199  1.00 23.69           C
ATOM   1506  OD1 ASN A 189      43.319  35.512  37.605  1.00 25.68           O
ATOM   1507  ND2 ASN A 189      42.945  33.653  38.789  1.00 22.68           N
ATOM   1508  C   ASN A 189      39.463  36.794  37.291  1.00 22.23           C
ATOM   1509  O   ASN A 189      39.301  36.330  36.200  1.00 22.40           O
ATOM   1510  N   GLY A 190      38.550  37.562  37.883  1.00 20.71           N
ATOM   1511  CA  GLY A 190      37.346  37.950  37.140  1.00 20.80           C
ATOM   1512  C   GLY A 190      37.763  38.665  35.855  1.00 19.27           C
ATOM   1513  O   GLY A 190      37.385  38.262  34.745  1.00 19.63           O
ATOM   1514  N   THR A 191      38.594  39.694  36.009  1.00 18.60           N
ATOM   1515  CA  THR A 191      39.132  40.456  34.883  1.00 18.37           C
ATOM   1516  CB  THR A 191      39.809  41.748  35.413  1.00 19.44           C
ATOM   1517  OG1 THR A 191      38.794  42.571  36.003  1.00 20.09           O
ATOM   1518  CG2 THR A 191      40.422  42.560  34.297  1.00 19.07           C
ATOM   1519  C   THR A 191      40.067  39.650  34.001  1.00 18.59           C
ATOM   1520  O   THR A 191      39.891  39.658  32.791  1.00 17.42           O
ATOM   1521  N   ARG A 192      41.019  38.911  34.606  1.00 17.96           N
ATOM   1522  CA  ARG A 192      41.999  38.165  33.807  1.00 19.85           C
ATOM   1523  CB  ARG A 192      43.102  37.552  34.678  1.00 19.96           C
ATOM   1524  CG  ARG A 192      43.936  38.593  35.459  1.00 21.40           C
ATOM   1525  CD  ARG A 192      45.021  37.956  36.387  1.00 24.09           C
ATOM   1526  NE  ARG A 192      46.131  37.413  35.573  1.00 29.42           N
ATOM   1527  CZ  ARG A 192      46.551  36.143  35.559  1.00 30.51           C
ATOM   1528  NH1 ARG A 192      45.998  35.223  36.320  1.00 31.17           N
ATOM   1529  NH2 ARG A 192      47.560  35.799  34.777  1.00 34.28           N
ATOM   1530  C   ARG A 192      41.338  37.089  32.958  1.00 18.31           C
ATOM   1531  O   ARG A 192      41.754  36.856  31.828  1.00 17.99           O
ATOM   1532  N   VAL A 193      40.298  36.452  33.498  1.00 18.29           N
ATOM   1533  CA  VAL A 193      39.633  35.356  32.764  1.00 18.17           C
ATOM   1534  CB  VAL A 193      38.640  34.573  33.672  1.00 18.25           C
ATOM   1535  CG1 VAL A 193      37.627  33.744  32.810  1.00 19.18           C
ATOM   1536  CG2 VAL A 193      39.445  33.645  34.585  1.00 19.49           C
ATOM   1537  C   VAL A 193      38.926  35.893  31.508  1.00 18.77           C
ATOM   1538  O   VAL A 193      39.095  35.344  30.419  1.00 16.89           O
ATOM   1539  N   THR A 194      38.156  36.978  31.663  1.00 18.75           N
ATOM   1540  CA  THR A 194      37.551  37.636  30.478  1.00 20.61           C
ATOM   1541  CB  THR A 194      36.764  38.906  30.854  1.00 20.81           C
ATOM   1542  OG1 THR A 194      35.493  38.511  31.321  1.00 25.35           O
ATOM   1543  CG2 THR A 194      36.401  39.716  29.578  1.00 21.27           C
ATOM   1544  C   THR A 194      38.555  37.949  29.395  1.00 20.23           C
ATOM   1545  O   THR A 194      38.339  37.610  28.206  1.00 20.42           O
ATOM   1546  N   ASP A 195      39.668  38.577  29.777  1.00 19.13           N
ATOM   1547  CA  ASP A 195      40.685  38.893  28.798  1.00 20.26           C
ATOM   1548  CB  ASP A 195      41.740  39.838  29.362  1.00 19.51           C
ATOM   1549  CG  ASP A 195      41.164  41.196  29.738  1.00 21.39           C
ATOM   1550  OD1 ASP A 195      39.995  41.505  29.367  1.00 20.59           O
ATOM   1551  OD2 ASP A 195      41.843  42.019  30.402  1.00 23.30           O
ATOM   1552  C   ASP A 195      41.360  37.675  28.137  1.00 19.68           C
ATOM   1553  O   ASP A 195      41.652  37.709  26.938  1.00 19.57           O
ATOM   1554  N   GLU A 196      41.612  36.619  28.904  1.00 19.56           N
ATOM   1555  CA  GLU A 196      42.209  35.428  28.301  1.00 19.45           C
ATOM   1556  CB  GLU A 196      42.710  34.457  29.370  1.00 20.36           C
ATOM   1557  CG  GLU A 196      43.870  35.012  30.173  1.00 21.91           C
ATOM   1558  CD  GLU A 196      44.714  33.913  30.797  1.00 26.66           C
ATOM   1559  OE1 GLU A 196      44.521  32.722  30.426  1.00 26.10           O
ATOM   1560  OE2 GLU A 196      45.588  34.249  31.632  1.00 25.84           O
ATOM   1561  C   GLU A 196      41.232  34.728  27.344  1.00 18.97           C
ATOM   1562  O   GLU A 196      41.657  34.267  26.301  1.00 18.46           O
ATOM   1563  N   ILE A 197      39.929  34.668  27.681  1.00 17.58           N
ATOM   1564  CA  ILE A 197      38.917  34.081  26.774  1.00 18.05           C
ATOM   1565  CB  ILE A 197      37.498  34.151  27.361  1.00 16.67           C
ATOM   1566  CG1 ILE A 197      37.377  33.227  28.594  1.00 17.37           C
ATOM   1567  CD1 ILE A 197      36.090  33.379  29.403  1.00 17.65           C
ATOM   1568  CG2 ILE A 197      36.426  33.765  26.290  1.00 19.37           C
ATOM   1569  C   ILE A 197      38.988  34.761  25.393  1.00 18.24           C
ATOM   1570  O   ILE A 197      39.029  34.109  24.352  1.00 16.78           O
ATOM   1571  N   LEU A 198      39.062  36.085  25.397  1.00 18.58           N
ATOM   1572  CA  LEU A 198      39.144  36.796  24.112  1.00 19.96           C
ATOM   1573  CB  LEU A 198      38.984  38.296  24.304  1.00 19.18           C
ATOM   1574  CG  LEU A 198      37.560  38.643  24.692  1.00 19.98           C
ATOM   1575  CD1 LEU A 198      37.489  40.120  25.103  1.00 23.68           C
ATOM   1576  CD2 LEU A 198      36.636  38.367  23.471  1.00 21.93           C
ATOM   1577  C   LEU A 198      40.413  36.474  23.342  1.00 20.48           C
ATOM   1578  O   LEU A 198      40.386  36.494  22.123  1.00 21.49           O
ATOM   1579  N  AGLU A 199      41.505  36.181  24.063  0.50 20.50           N
ATOM   1580  N  BGLU A 199      41.506  36.170  24.036  0.50 20.63           N
ATOM   1581  CA AGLU A 199      42.805  35.822  23.471  0.50 20.97           C
ATOM   1582  CA BGLU A 199      42.755  35.855  23.354  0.50 20.93           C
ATOM   1583  CB AGLU A 199      43.934  35.835  24.538  0.50 21.04           C
ATOM   1584  CB BGLU A 199      43.964  36.233  24.218  0.50 21.94           C
ATOM   1585  CG AGLU A 199      44.270  37.221  25.093  0.50 22.00           C
ATOM   1586  CG BGLU A 199      44.359  37.696  24.080  0.50 23.55           C
ATOM   1587  CD AGLU A 199      45.418  37.259  26.107  0.50 23.28           C
ATOM   1588  CD BGLU A 199      44.867  38.028  22.688  0.50 27.34           C
ATOM   1589  OE1AGLU A 199      45.888  36.211  26.613  0.50 25.73           O
ATOM   1590  OE1BGLU A 199      44.236  38.857  22.001  0.50 28.51           O
ATOM   1591  OE2AGLU A 199      45.839  38.385  26.429  0.50 27.96           O
ATOM   1592  OE2BGLU A 199      45.890  37.441  22.265  0.50 30.44           O
ATOM   1593  C  AGLU A 199      42.731  34.427  22.845  0.50 19.85           C
ATOM   1594  C  BGLU A 199      42.823  34.386  22.947  0.50 20.07           C
ATOM   1595  O  AGLU A 199      43.447  34.115  21.881  0.50 19.43           O
ATOM   1596  O  BGLU A 199      43.739  33.979  22.231  0.50 19.82           O
ATOM   1597  N   LEU A 200      41.846  33.600  23.399  1.00 19.41           N
ATOM   1598  CA  LEU A 200      41.837  32.135  23.136  1.00 18.78           C
ATOM   1599  CB  LEU A 200      41.566  31.381  24.441  1.00 18.51           C
ATOM   1600  CG  LEU A 200      42.703  31.395  25.473  1.00 17.90           C
ATOM   1601  CD1 LEU A 200      42.169  31.057  26.868  1.00 17.39           C
ATOM   1602  CD2 LEU A 200      43.874  30.494  25.071  1.00 19.42           C
ATOM   1603  C   LEU A 200      40.849  31.676  22.045  1.00 18.25           C
ATOM   1604  O   LEU A 200      40.737  30.482  21.750  1.00 18.50           O
ATOM   1605  N   VAL A 201      40.144  32.612  21.433  1.00 18.14           N
ATOM   1606  CA  VAL A 201      39.190  32.271  20.347  1.00 17.64           C
ATOM   1607  CB  VAL A 201      37.724  32.802  20.652  1.00 17.83           C
ATOM   1608  CG1 VAL A 201      37.156  32.059  21.881  1.00 16.79           C
ATOM   1609  CG2 VAL A 201      37.665  34.325  20.820  1.00 17.50           C
ATOM   1610  C   VAL A 201      39.728  32.815  19.005  1.00 18.55           C
ATOM   1611  O   VAL A 201      40.266  33.933  18.977  1.00 18.64           O
ATOM   1612  N   PRO A 202      39.608  32.042  17.929  1.00 18.55           N
ATOM   1613  CA  PRO A 202      40.174  32.439  16.619  1.00 19.64           C
ATOM   1614  CB  PRO A 202      39.786  31.280  15.672  1.00 20.42           C
ATOM   1615  CG  PRO A 202      39.005  30.338  16.434  1.00 21.39           C
ATOM   1616  CD  PRO A 202      38.993  30.705  17.895  1.00 17.93           C
ATOM   1617  C   PRO A 202      39.581  33.725  16.080  1.00 19.05           C
ATOM   1618  O   PRO A 202      40.288  34.532  15.459  1.00 19.51           O
ATOM   1619  N   LYS A 203      38.285  33.915  16.284  1.00 18.42           N
ATOM   1620  CA  LYS A 203      37.559  35.043  15.686  1.00 19.13           C
ATOM   1621  CB  LYS A 203      36.780  34.569  14.453  1.00 19.58           C
ATOM   1622  CG  LYS A 203      37.698  34.157  13.272  1.00 20.77           C
ATOM   1623  CD  LYS A 203      36.822  34.030  12.054  1.00 26.40           C
ATOM   1624  CE  LYS A 203      37.617  33.872  10.769  1.00 27.69           C
ATOM   1625  NZ  LYS A 203      36.616  33.963   9.612  1.00 29.20           N
ATOM   1626  C   LYS A 203      36.614  35.649  16.723  1.00 19.76           C
ATOM   1627  O   LYS A 203      35.522  35.132  16.927  1.00 18.35           O
ATOM   1628  N   PRO A 204      37.086  36.666  17.459  1.00 19.87           N
ATOM   1629  CA  PRO A 204      36.302  37.237  18.562  1.00 19.91           C
ATOM   1630  CB  PRO A 204      37.130  38.453  18.978  1.00 20.35           C
ATOM   1631  CG  PRO A 204      38.586  37.970  18.695  1.00 22.29           C
ATOM   1632  CD  PRO A 204      38.444  37.238  17.389  1.00 20.97           C
ATOM   1633  C   PRO A 204      34.871  37.609  18.201  1.00 19.82           C
ATOM   1634  O   PRO A 204      33.964  37.361  18.997  1.00 18.92           O
ATOM   1635  N   ASN A 205      34.639  38.191  17.022  1.00 18.99           N
ATOM   1636  CA  ASN A 205      33.266  38.569  16.742  1.00 20.73           C
ATOM   1637  CB  ASN A 205      33.220  39.728  15.783  1.00 21.97           C
ATOM   1638  CG  ASN A 205      33.670  41.010  16.474  1.00 26.33           C
ATOM   1639  OD1 ASN A 205      33.218  41.319  17.613  1.00 31.30           O
ATOM   1640  ND2 ASN A 205      34.591  41.727  15.841  1.00 32.00           N
ATOM   1641  C   ASN A 205      32.325  37.406  16.406  1.00 18.62           C
ATOM   1642  O   ASN A 205      31.152  37.428  16.799  1.00 18.12           O
ATOM   1643  N   VAL A 206      32.861  36.366  15.777  1.00 17.73           N
ATOM   1644  CA  VAL A 206      32.111  35.121  15.643  1.00 16.35           C
ATOM   1645  CB  VAL A 206      32.869  34.079  14.799  1.00 17.90           C
ATOM   1646  CG1 VAL A 206      32.204  32.720  14.909  1.00 16.69           C
ATOM   1647  CG2 VAL A 206      32.864  34.522  13.339  1.00 17.65           C
ATOM   1648  C   VAL A 206      31.727  34.543  17.023  1.00 15.24           C
ATOM   1649  O   VAL A 206      30.589  34.129  17.254  1.00 15.05           O
ATOM   1650  N   PHE A 207      32.700  34.528  17.933  1.00 15.90           N
ATOM   1651  CA  PHE A 207      32.492  34.081  19.302  1.00 14.91           C
ATOM   1652  CB  PHE A 207      33.849  34.133  20.058  1.00 15.51           C
ATOM   1653  CG  PHE A 207      33.721  34.173  21.562  1.00 14.73           C
ATOM   1654  CD1 PHE A 207      33.443  32.993  22.271  1.00 15.73           C
ATOM   1655  CE1 PHE A 207      33.294  32.990  23.667  1.00 15.80           C
ATOM   1656  CZ  PHE A 207      33.437  34.183  24.383  1.00 16.77           C
ATOM   1657  CE2 PHE A 207      33.730  35.380  23.676  1.00 16.97           C
ATOM   1658  CD2 PHE A 207      33.870  35.376  22.272  1.00 15.59           C
ATOM   1659  C   PHE A 207      31.436  34.943  20.007  1.00 16.03           C
ATOM   1660  O   PHE A 207      30.545  34.412  20.672  1.00 15.74           O
ATOM   1661  N   ARG A 208      31.515  36.263  19.848  1.00 16.14           N
ATOM   1662  CA  ARG A 208      30.529  37.123  20.542  1.00 15.73           C
ATOM   1663  CB  ARG A 208      30.868  38.610  20.416  1.00 16.33           C
ATOM   1664  CG  ARG A 208      32.044  39.060  21.325  1.00 14.73           C
ATOM   1665  CD  ARG A 208      32.166  40.554  21.353  1.00 16.01           C
ATOM   1666  NE  ARG A 208      33.370  41.002  22.068  1.00 17.78           N
ATOM   1667  CZ  ARG A 208      34.549  41.235  21.496  1.00 21.06           C
ATOM   1668  NH1 ARG A 208      34.730  41.043  20.190  1.00 21.36           N
ATOM   1669  NH2 ARG A 208      35.569  41.662  22.244  1.00 19.93           N
ATOM   1670  C   ARG A 208      29.091  36.865  20.122  1.00 15.81           C
ATOM   1671  O   ARG A 208      28.196  36.776  20.993  1.00 16.55           O
ATOM   1672  N   ILE A 209      28.855  36.762  18.819  1.00 15.22           N
ATOM   1673  CA  ILE A 209      27.512  36.446  18.307  1.00 15.09           C
ATOM   1674  CB  ILE A 209      27.444  36.592  16.762  1.00 15.05           C
ATOM   1675  CG1 ILE A 209      27.664  38.066  16.408  1.00 16.30           C
ATOM   1676  CD1 ILE A 209      26.630  39.000  17.041  1.00 20.29           C
ATOM   1677  CG2 ILE A 209      26.086  36.037  16.182  1.00 16.18           C
ATOM   1678  C   ILE A 209      27.030  35.084  18.772  1.00 15.09           C
ATOM   1679  O   ILE A 209      25.924  34.957  19.262  1.00 12.95           O
ATOM   1680  N   ALA A 210      27.861  34.061  18.637  1.00 13.66           N
ATOM   1681  CA  ALA A 210      27.481  32.716  19.162  1.00 14.45           C
ATOM   1682  CB  ALA A 210      28.621  31.753  18.909  1.00 15.08           C
ATOM   1683  C   ALA A 210      27.119  32.719  20.664  1.00 14.65           C
ATOM   1684  O   ALA A 210      26.108  32.114  21.101  1.00 14.32           O
ATOM   1685  N   LEU A 211      27.965  33.384  21.443  1.00 14.07           N
ATOM   1686  CA  LEU A 211      27.725  33.504  22.869  1.00 14.29           C
ATOM   1687  CB  LEU A 211      28.947  34.103  23.583  1.00 14.99           C
ATOM   1688  CG  LEU A 211      28.826  34.306  25.103  1.00 14.85           C
ATOM   1689  CD1 LEU A 211      28.322  32.977  25.776  1.00 17.21           C
ATOM   1690  CD2 LEU A 211      30.228  34.751  25.659  1.00 14.78           C
ATOM   1691  C   LEU A 211      26.449  34.287  23.175  1.00 14.92           C
ATOM   1692  O   LEU A 211      25.706  33.928  24.091  1.00 13.69           O
ATOM   1693  N   ARG A 212      26.207  35.384  22.462  1.00 15.06           N
ATOM   1694  CA  ARG A 212      24.922  36.091  22.674  1.00 15.63           C
ATOM   1695  CB  ARG A 212      24.830  37.319  21.759  1.00 16.68           C
ATOM   1696  CG  ARG A 212      25.659  38.496  22.240  1.00 16.49           C
ATOM   1697  CD  ARG A 212      25.547  39.716  21.317  1.00 17.30           C
ATOM   1698  NE  ARG A 212      26.174  40.849  21.988  1.00 18.25           N
ATOM   1699  CZ  ARG A 212      25.593  41.586  22.930  1.00 18.63           C
ATOM   1700  NH1 ARG A 212      24.336  41.366  23.292  1.00 15.93           N
ATOM   1701  NH2 ARG A 212      26.289  42.558  23.492  1.00 17.42           N
ATOM   1702  C   ARG A 212      23.714  35.150  22.452  1.00 15.61           C
ATOM   1703  O   ARG A 212      22.709  35.199  23.177  1.00 16.39           O
ATOM   1704  N   ALA A 213      23.815  34.284  21.451  1.00 15.51           N
ATOM   1705  CA  ALA A 213      22.760  33.323  21.137  1.00 15.88           C
ATOM   1706  CB  ALA A 213      23.050  32.658  19.743  1.00 13.30           C
ATOM   1707  C   ALA A 213      22.659  32.276  22.244  1.00 16.19           C
ATOM   1708  O   ALA A 213      21.567  31.984  22.718  1.00 15.71           O
ATOM   1709  N   ILE A 214      23.808  31.779  22.740  1.00 15.88           N
ATOM   1710  CA  ILE A 214      23.749  30.778  23.828  1.00 14.96           C
ATOM   1711  CB  ILE A 214      25.128  30.073  24.016  1.00 14.80           C
ATOM   1712  CG1 ILE A 214      25.417  29.138  22.800  1.00 12.56           C
ATOM   1713  CD1 ILE A 214      24.255  28.122  22.432  1.00 14.91           C
ATOM   1714  CG2 ILE A 214      25.220  29.319  25.399  1.00 15.74           C
ATOM   1715  C   ILE A 214      23.192  31.404  25.124  1.00 14.94           C
ATOM   1716  O   ILE A 214      22.410  30.774  25.841  1.00 16.28           O
ATOM   1717  N   LYS A 215      23.548  32.665  25.393  1.00 14.86           N
ATOM   1718  CA  LYS A 215      23.038  33.322  26.609  1.00 14.69           C
ATOM   1719  CB  LYS A 215      23.667  34.688  26.822  1.00 15.76           C
ATOM   1720  CG  LYS A 215      25.112  34.600  27.274  1.00 16.47           C
ATOM   1721  CD  LYS A 215      25.826  35.976  27.146  1.00 17.78           C
ATOM   1722  CE  LYS A 215      25.524  36.875  28.357  1.00 18.80           C
ATOM   1723  NZ  LYS A 215      26.201  36.359  29.600  1.00 21.02           N
ATOM   1724  C   LYS A 215      21.505  33.445  26.503  1.00 15.84           C
ATOM   1725  O   LYS A 215      20.817  33.141  27.472  1.00 15.73           O
ATOM   1726  N   LEU A 216      21.008  33.865  25.338  1.00 15.99           N
ATOM   1727  CA  LEU A 216      19.546  33.987  25.141  1.00 16.55           C
ATOM   1728  CB  LEU A 216      19.225  34.646  23.791  1.00 16.83           C
ATOM   1729  CG  LEU A 216      17.736  34.744  23.419  1.00 17.40           C
ATOM   1730  CD1 LEU A 216      16.944  35.544  24.481  1.00 19.67           C
ATOM   1731  CD2 LEU A 216      17.589  35.357  21.974  1.00 17.38           C
ATOM   1732  C   LEU A 216      18.854  32.627  25.263  1.00 16.66           C
ATOM   1733  O   LEU A 216      17.833  32.464  25.989  1.00 15.45           O
ATOM   1734  N   TRP A 217      19.404  31.663  24.546  1.00 16.26           N
ATOM   1735  CA  TRP A 217      18.866  30.305  24.568  1.00 17.33           C
ATOM   1736  CB  TRP A 217      19.721  29.419  23.656  1.00 17.17           C
ATOM   1737  CG  TRP A 217      19.551  27.932  23.880  1.00 15.69           C
ATOM   1738  CD1 TRP A 217      18.598  27.117  23.347  1.00 17.16           C
ATOM   1739  NE1 TRP A 217      18.775  25.823  23.789  1.00 17.45           N
ATOM   1740  CE2 TRP A 217      19.873  25.783  24.620  1.00 16.95           C
ATOM   1741  CD2 TRP A 217      20.391  27.101  24.692  1.00 16.56           C
ATOM   1742  CE3 TRP A 217      21.521  27.343  25.487  1.00 15.57           C
ATOM   1743  CZ3 TRP A 217      22.111  26.258  26.162  1.00 16.37           C
ATOM   1744  CH2 TRP A 217      21.558  24.958  26.071  1.00 17.31           C
ATOM   1745  CZ2 TRP A 217      20.441  24.711  25.298  1.00 15.85           C
ATOM   1746  C   TRP A 217      18.832  29.748  26.008  1.00 18.23           C
ATOM   1747  O   TRP A 217      17.784  29.238  26.499  1.00 18.13           O
ATOM   1748  N   ALA A 218      19.956  29.877  26.713  1.00 16.93           N
ATOM   1749  CA  ALA A 218      20.050  29.283  28.057  1.00 17.50           C
ATOM   1750  CB  ALA A 218      21.504  29.349  28.592  1.00 17.87           C
ATOM   1751  C   ALA A 218      19.077  29.967  29.031  1.00 18.41           C
ATOM   1752  O   ALA A 218      18.445  29.315  29.864  1.00 17.95           O
ATOM   1753  N   GLN A 219      18.953  31.286  28.906  1.00 19.43           N
ATOM   1754  CA  GLN A 219      17.940  32.023  29.682  1.00 20.93           C
ATOM   1755  CB  GLN A 219      18.039  33.505  29.370  1.00 21.92           C
ATOM   1756  CG  GLN A 219      19.260  34.139  29.997  1.00 24.35           C
ATOM   1757  CD  GLN A 219      19.797  35.357  29.211  1.00 27.91           C
ATOM   1758  OE1 GLN A 219      19.133  35.924  28.321  1.00 29.77           O
ATOM   1759  NE2 GLN A 219      20.992  35.748  29.547  1.00 26.37           N
ATOM   1760  C   GLN A 219      16.513  31.495  29.410  1.00 21.64           C
ATOM   1761  O   GLN A 219      15.775  31.140  30.330  1.00 21.77           O
ATOM   1762  N   ARG A 220      16.147  31.466  28.136  1.00 22.14           N
ATOM   1763  CA  ARG A 220      14.824  31.036  27.679  1.00 21.99           C
ATOM   1764  CB  ARG A 220      14.772  31.133  26.159  1.00 21.17           C
ATOM   1765  CG  ARG A 220      14.589  32.578  25.682  1.00 22.17           C
ATOM   1766  CD  ARG A 220      13.161  33.110  25.897  1.00 24.56           C
ATOM   1767  NE  ARG A 220      13.103  34.511  25.490  1.00 26.29           N
ATOM   1768  CZ  ARG A 220      12.970  34.932  24.234  1.00 26.32           C
ATOM   1769  NH1 ARG A 220      12.889  34.066  23.232  1.00 28.59           N
ATOM   1770  NH2 ARG A 220      12.940  36.235  23.978  1.00 29.03           N
ATOM   1771  C   ARG A 220      14.500  29.622  28.147  1.00 21.80           C
ATOM   1772  O   ARG A 220      13.380  29.366  28.618  1.00 21.77           O
ATOM   1773  N   ARG A 221      15.483  28.726  28.027  1.00 20.12           N
ATOM   1774  CA  ARG A 221      15.309  27.306  28.398  1.00 19.90           C
ATOM   1775  CB  ARG A 221      16.224  26.407  27.515  1.00 19.64           C
ATOM   1776  CG  ARG A 221      16.028  26.618  26.022  1.00 20.05           C
ATOM   1777  CD  ARG A 221      14.562  26.446  25.590  1.00 19.82           C
ATOM   1778  NE  ARG A 221      14.104  25.087  25.941  1.00 23.45           N
ATOM   1779  CZ  ARG A 221      12.841  24.661  25.886  1.00 22.80           C
ATOM   1780  NH1 ARG A 221      11.863  25.482  25.485  1.00 21.76           N
ATOM   1781  NH2 ARG A 221      12.569  23.402  26.202  1.00 22.54           N
ATOM   1782  C   ARG A 221      15.475  27.021  29.909  1.00 20.02           C
ATOM   1783  O   ARG A 221      15.323  25.868  30.340  1.00 20.52           O
ATOM   1784  N   ALA A 222      15.726  28.081  30.701  1.00 20.07           N
ATOM   1785  CA  ALA A 222      15.912  28.014  32.158  1.00 20.55           C
ATOM   1786  CB  ALA A 222      14.600  27.627  32.876  1.00 20.32           C
ATOM   1787  C   ALA A 222      17.057  27.066  32.531  1.00 20.13           C
ATOM   1788  O   ALA A 222      16.919  26.205  33.398  1.00 20.68           O
ATOM   1789  N   VAL A 223      18.184  27.203  31.830  1.00 19.16           N
ATOM   1790  CA  VAL A 223      19.392  26.487  32.218  1.00 18.31           C
ATOM   1791  CB  VAL A 223      19.738  25.348  31.232  1.00 18.40           C
ATOM   1792  CG1 VAL A 223      18.634  24.294  31.286  1.00 19.45           C
ATOM   1793  CG2 VAL A 223      19.943  25.928  29.777  1.00 17.91           C
ATOM   1794  C   VAL A 223      20.565  27.474  32.448  1.00 18.68           C
ATOM   1795  O   VAL A 223      21.718  27.205  32.134  1.00 18.19           O
ATOM   1796  N   TYR A 224      20.242  28.634  33.009  1.00 18.49           N
ATOM   1797  CA  TYR A 224      21.198  29.707  33.233  1.00 18.67           C
ATOM   1798  CB  TYR A 224      20.948  30.801  32.177  1.00 18.70           C
ATOM   1799  CG  TYR A 224      22.003  31.905  32.039  1.00 19.61           C
ATOM   1800  CD1 TYR A 224      22.569  32.180  30.805  1.00 20.13           C
ATOM   1801  CE1 TYR A 224      23.506  33.196  30.635  1.00 22.41           C
ATOM   1802  CZ  TYR A 224      23.933  33.926  31.719  1.00 21.40           C
ATOM   1803  OH  TYR A 224      24.844  34.926  31.519  1.00 19.59           O
ATOM   1804  CE2 TYR A 224      23.392  33.691  32.980  1.00 24.09           C
ATOM   1805  CD2 TYR A 224      22.430  32.667  33.138  1.00 24.77           C
ATOM   1806  C   TYR A 224      20.930  30.281  34.626  1.00 19.05           C
ATOM   1807  O   TYR A 224      19.947  31.009  34.800  1.00 21.02           O
ATOM   1808  N   ALA A 225      21.816  29.972  35.579  1.00 18.24           N
ATOM   1809  CA  ALA A 225      21.823  30.485  36.962  1.00 17.92           C
ATOM   1810  CB  ALA A 225      20.445  30.460  37.637  1.00 17.46           C
ATOM   1811  C   ALA A 225      22.832  29.678  37.779  1.00 17.30           C
ATOM   1812  O   ALA A 225      22.536  28.583  38.297  1.00 16.61           O
ATOM   1813  N   ASN A 226      24.026  30.230  37.910  1.00 15.54           N
ATOM   1814  CA  ASN A 226      25.057  29.581  38.710  1.00 15.69           C
ATOM   1815  CB  ASN A 226      26.295  30.459  38.802  1.00 17.38           C
ATOM   1816  CG  ASN A 226      27.382  29.792  39.607  1.00 17.63           C
ATOM   1817  OD1 ASN A 226      27.932  28.789  39.172  1.00 18.03           O
ATOM   1818  ND2 ASN A 226      27.699  30.347  40.771  1.00 16.92           N
ATOM   1819  C   ASN A 226      24.578  29.262  40.138  1.00 16.32           C
ATOM   1820  O   ASN A 226      24.876  28.172  40.683  1.00 15.60           O
ATOM   1821  N   ILE A 227      23.865  30.220  40.723  1.00 15.44           N
ATOM   1822  CA  ILE A 227      23.435  30.030  42.115  1.00 17.24           C
ATOM   1823  CB  ILE A 227      22.750  31.313  42.645  1.00 16.96           C
ATOM   1824  CG1 ILE A 227      22.638  31.257  44.190  1.00 17.28           C
ATOM   1825  CD1 ILE A 227      22.196  32.620  44.840  1.00 17.24           C
ATOM   1826  CG2 ILE A 227      21.446  31.564  41.909  1.00 16.13           C
ATOM   1827  C   ILE A 227      22.555  28.783  42.295  1.00 17.29           C
ATOM   1828  O   ILE A 227      22.615  28.140  43.346  1.00 18.23           O
ATOM   1829  N   PHE A 228      21.753  28.443  41.279  1.00 18.56           N
ATOM   1830  CA  PHE A 228      20.861  27.288  41.372  1.00 20.13           C
ATOM   1831  CB  PHE A 228      19.502  27.644  40.743  1.00 20.32           C
ATOM   1832  CG  PHE A 228      18.780  28.717  41.493  1.00 22.13           C
ATOM   1833  CD1 PHE A 228      18.358  29.862  40.852  1.00 20.96           C
ATOM   1834  CE1 PHE A 228      17.689  30.866  41.535  1.00 23.51           C
ATOM   1835  CZ  PHE A 228      17.474  30.739  42.891  1.00 24.97           C
ATOM   1836  CE2 PHE A 228      17.934  29.605  43.573  1.00 29.55           C
ATOM   1837  CD2 PHE A 228      18.597  28.602  42.872  1.00 25.51           C
ATOM   1838  C   PHE A 228      21.413  25.981  40.758  1.00 20.43           C
ATOM   1839  O   PHE A 228      20.672  25.008  40.640  1.00 21.29           O
ATOM   1840  N   GLY A 229      22.698  25.945  40.401  1.00 19.91           N
ATOM   1841  CA  GLY A 229      23.282  24.718  39.856  1.00 19.21           C
ATOM   1842  C   GLY A 229      23.295  24.593  38.334  1.00 19.05           C
ATOM   1843  O   GLY A 229      23.613  23.518  37.818  1.00 19.04           O
ATOM   1844  N   PHE A 230      22.993  25.683  37.622  1.00 17.76           N
ATOM   1845  CA  PHE A 230      23.142  25.727  36.148  1.00 17.90           C
ATOM   1846  CB  PHE A 230      21.875  26.239  35.479  1.00 17.98           C
ATOM   1847  CG  PHE A 230      20.739  25.268  35.537  1.00 18.12           C
ATOM   1848  CD1 PHE A 230      19.747  25.394  36.527  1.00 18.50           C
ATOM   1849  CE1 PHE A 230      18.660  24.456  36.577  1.00 20.99           C
ATOM   1850  CZ  PHE A 230      18.587  23.419  35.661  1.00 20.51           C
ATOM   1851  CE2 PHE A 230      19.567  23.279  34.670  1.00 19.79           C
ATOM   1852  CD2 PHE A 230      20.649  24.215  34.620  1.00 20.89           C
ATOM   1853  C   PHE A 230      24.366  26.586  35.771  1.00 18.26           C
ATOM   1854  O   PHE A 230      24.883  27.322  36.630  1.00 16.98           O
ATOM   1855  N   PRO A 231      24.898  26.459  34.545  1.00 17.26           N
ATOM   1856  CA  PRO A 231      26.051  27.280  34.223  1.00 17.19           C
ATOM   1857  CB  PRO A 231      26.468  26.800  32.828  1.00 16.58           C
ATOM   1858  CG  PRO A 231      25.835  25.339  32.703  1.00 17.73           C
ATOM   1859  CD  PRO A 231      24.544  25.526  33.446  1.00 17.34           C
ATOM   1860  C   PRO A 231      25.643  28.738  34.216  1.00 16.79           C
ATOM   1861  O   PRO A 231      24.514  29.052  33.819  1.00 17.48           O
ATOM   1862  N   GLY A 232      26.548  29.601  34.652  1.00 17.52           N
ATOM   1863  CA  GLY A 232      26.317  31.051  34.527  1.00 16.91           C
ATOM   1864  C   GLY A 232      27.049  31.588  33.302  1.00 15.76           C
ATOM   1865  O   GLY A 232      27.521  30.819  32.454  1.00 14.47           O
ATOM   1866  N   GLY A 233      27.199  32.906  33.258  1.00 15.16           N
ATOM   1867  CA  GLY A 233      27.802  33.567  32.093  1.00 15.01           C
ATOM   1868  C   GLY A 233      29.192  33.080  31.710  1.00 14.80           C
ATOM   1869  O   GLY A 233      29.452  32.897  30.539  1.00 14.40           O
ATOM   1870  N   VAL A 234      30.098  32.878  32.681  1.00 14.28           N
ATOM   1871  CA  VAL A 234      31.485  32.557  32.289  1.00 15.78           C
ATOM   1872  CB  VAL A 234      32.564  32.855  33.396  1.00 15.85           C
ATOM   1873  CG1 VAL A 234      32.486  31.842  34.573  1.00 17.03           C
ATOM   1874  CG2 VAL A 234      34.023  33.002  32.813  1.00 16.61           C
ATOM   1875  C   VAL A 234      31.558  31.120  31.810  1.00 14.60           C
ATOM   1876  O   VAL A 234      32.333  30.818  30.921  1.00 15.29           O
ATOM   1877  N   ALA A 235      30.784  30.243  32.454  1.00 15.06           N
ATOM   1878  CA  ALA A 235      30.773  28.839  32.055  1.00 14.79           C
ATOM   1879  CB  ALA A 235      29.924  28.026  33.037  1.00 16.61           C
ATOM   1880  C   ALA A 235      30.221  28.718  30.603  1.00 15.26           C
ATOM   1881  O   ALA A 235      30.829  28.049  29.743  1.00 13.94           O
ATOM   1882  N   TRP A 236      29.098  29.377  30.329  1.00 13.05           N
ATOM   1883  CA  TRP A 236      28.564  29.422  28.967  1.00 15.33           C
ATOM   1884  CB  TRP A 236      27.207  30.121  28.891  1.00 15.70           C
ATOM   1885  CG  TRP A 236      26.076  29.331  29.475  1.00 16.20           C
ATOM   1886  CD1 TRP A 236      25.236  29.728  30.480  1.00 16.21           C
ATOM   1887  NE1 TRP A 236      24.330  28.733  30.756  1.00 17.92           N
ATOM   1888  CE2 TRP A 236      24.547  27.678  29.910  1.00 17.80           C
ATOM   1889  CD2 TRP A 236      25.644  28.015  29.085  1.00 17.61           C
ATOM   1890  CE3 TRP A 236      26.078  27.082  28.119  1.00 16.05           C
ATOM   1891  CZ3 TRP A 236      25.409  25.822  28.043  1.00 16.05           C
ATOM   1892  CH2 TRP A 236      24.339  25.535  28.910  1.00 16.77           C
ATOM   1893  CZ2 TRP A 236      23.881  26.452  29.823  1.00 17.21           C
ATOM   1894  C   TRP A 236      29.596  30.046  27.996  1.00 14.53           C
ATOM   1895  O   TRP A 236      29.779  29.524  26.888  1.00 14.22           O
ATOM   1896  N   ALA A 237      30.293  31.114  28.422  1.00 14.74           N
ATOM   1897  CA  ALA A 237      31.327  31.750  27.559  1.00 15.01           C
ATOM   1898  CB  ALA A 237      31.912  33.018  28.230  1.00 14.23           C
ATOM   1899  C   ALA A 237      32.444  30.769  27.197  1.00 15.72           C
ATOM   1900  O   ALA A 237      32.823  30.663  26.020  1.00 14.85           O
ATOM   1901  N   MET A 238      32.937  30.026  28.201  1.00 15.88           N
ATOM   1902  CA  MET A 238      34.052  29.130  27.978  1.00 16.15           C
ATOM   1903  CB  MET A 238      34.648  28.686  29.320  1.00 15.79           C
ATOM   1904  CG  MET A 238      35.342  29.908  29.982  1.00 13.45           C
ATOM   1905  SD  MET A 238      36.270  29.372  31.388  1.00 17.46           S
ATOM   1906  CE  MET A 238      34.980  29.030  32.582  1.00 15.58           C
ATOM   1907  C   MET A 238      33.621  27.926  27.110  1.00 15.30           C
ATOM   1908  O   MET A 238      34.390  27.429  26.278  1.00 14.65           O
ATOM   1909  N   LEU A 239      32.396  27.456  27.323  1.00 15.31           N
ATOM   1910  CA  LEU A 239      31.850  26.388  26.464  1.00 14.68           C
ATOM   1911  CB  LEU A 239      30.467  25.960  26.940  1.00 14.72           C
ATOM   1912  CG  LEU A 239      30.502  25.054  28.207  1.00 14.78           C
ATOM   1913  CD1 LEU A 239      29.112  24.958  28.866  1.00 13.42           C
ATOM   1914  CD2 LEU A 239      31.048  23.636  27.926  1.00 14.50           C
ATOM   1915  C   LEU A 239      31.768  26.819  24.989  1.00 14.39           C
ATOM   1916  O   LEU A 239      32.210  26.084  24.101  1.00 13.22           O
ATOM   1917  N   VAL A 240      31.255  28.031  24.743  1.00 14.55           N
ATOM   1918  CA  VAL A 240      31.200  28.556  23.394  1.00 13.91           C
ATOM   1919  CB  VAL A 240      30.401  29.885  23.334  1.00 14.91           C
ATOM   1920  CG1 VAL A 240      30.462  30.509  21.942  1.00 14.12           C
ATOM   1921  CG2 VAL A 240      28.917  29.613  23.699  1.00 14.09           C
ATOM   1922  C   VAL A 240      32.620  28.742  22.855  1.00 14.88           C
ATOM   1923  O   VAL A 240      32.867  28.401  21.728  1.00 13.59           O
ATOM   1924  N   ALA A 241      33.536  29.240  23.694  1.00 13.91           N
ATOM   1925  CA  ALA A 241      34.905  29.493  23.276  1.00 15.33           C
ATOM   1926  CB  ALA A 241      35.729  30.119  24.456  1.00 15.04           C
ATOM   1927  C   ALA A 241      35.542  28.194  22.770  1.00 14.04           C
ATOM   1928  O   ALA A 241      36.264  28.199  21.751  1.00 15.34           O
ATOM   1929  N   ARG A 242      35.298  27.100  23.481  1.00 14.28           N
ATOM   1930  CA  ARG A 242      35.877  25.799  23.100  1.00 13.80           C
ATOM   1931  CB  ARG A 242      35.565  24.733  24.173  1.00 14.73           C
ATOM   1932  CG  ARG A 242      36.278  23.379  23.883  1.00 15.43           C
ATOM   1933  CD  ARG A 242      37.766  23.404  24.148  1.00 19.77           C
ATOM   1934  NE  ARG A 242      38.476  22.187  23.696  1.00 18.12           N
ATOM   1935  CZ  ARG A 242      39.212  22.084  22.576  1.00 19.17           C
ATOM   1936  NH1 ARG A 242      39.338  23.109  21.710  1.00 16.29           N
ATOM   1937  NH2 ARG A 242      39.813  20.928  22.316  1.00 17.36           N
ATOM   1938  C   ARG A 242      35.390  25.355  21.698  1.00 14.21           C
ATOM   1939  O   ARG A 242      36.177  24.874  20.878  1.00 14.68           O
ATOM   1940  N   ILE A 243      34.095  25.513  21.440  1.00 13.16           N
ATOM   1941  CA  ILE A 243      33.558  25.172  20.097  1.00 14.23           C
ATOM   1942  CB  ILE A 243      32.035  25.235  20.060  1.00 15.40           C
ATOM   1943  CG1 ILE A 243      31.399  24.439  21.241  1.00 15.65           C
ATOM   1944  CD1 ILE A 243      31.840  22.958  21.381  1.00 17.92           C
ATOM   1945  CG2 ILE A 243      31.469  24.724  18.685  1.00 14.42           C
ATOM   1946  C   ILE A 243      34.212  26.090  19.024  1.00 14.73           C
ATOM   1947  O   ILE A 243      34.544  25.609  17.931  1.00 14.82           O
ATOM   1948  N   CYS A 244      34.330  27.393  19.327  1.00 14.86           N
ATOM   1949  CA  CYS A 244      35.018  28.352  18.428  1.00 14.36           C
ATOM   1950  CB  CYS A 244      35.033  29.749  19.045  1.00 15.21           C
ATOM   1951  SG  CYS A 244      33.364  30.486  19.001  1.00 16.41           S
ATOM   1952  C   CYS A 244      36.424  27.873  18.066  1.00 15.53           C
ATOM   1953  O   CYS A 244      36.843  27.928  16.887  1.00 15.21           O
ATOM   1954  N   GLN A 245      37.152  27.364  19.060  1.00 14.98           N
ATOM   1955  CA  GLN A 245      38.508  26.881  18.791  1.00 15.52           C
ATOM   1956  CB  GLN A 245      39.175  26.435  20.092  1.00 14.29           C
ATOM   1957  CG  GLN A 245      39.355  27.567  21.117  1.00 14.14           C
ATOM   1958  CD  GLN A 245      40.044  27.048  22.383  1.00 16.61           C
ATOM   1959  OE1 GLN A 245      39.834  25.888  22.773  1.00 17.23           O
ATOM   1960  NE2 GLN A 245      40.902  27.877  22.991  1.00 17.59           N
ATOM   1961  C   GLN A 245      38.480  25.692  17.837  1.00 16.27           C
ATOM   1962  O   GLN A 245      39.367  25.557  16.993  1.00 16.75           O
ATOM   1963  N   LEU A 246      37.443  24.855  17.959  1.00 15.68           N
ATOM   1964  CA  LEU A 246      37.350  23.598  17.186  1.00 15.75           C
ATOM   1965  CB  LEU A 246      36.413  22.584  17.877  1.00 15.29           C
ATOM   1966  CG  LEU A 246      36.925  22.019  19.218  1.00 14.96           C
ATOM   1967  CD1 LEU A 246      35.854  21.162  19.909  1.00 14.57           C
ATOM   1968  CD2 LEU A 246      38.302  21.245  19.065  1.00 13.06           C
ATOM   1969  C   LEU A 246      36.912  23.817  15.741  1.00 15.75           C
ATOM   1970  O   LEU A 246      37.127  22.940  14.882  1.00 15.83           O
ATOM   1971  N   TYR A 247      36.279  24.960  15.486  1.00 16.08           N
ATOM   1972  CA  TYR A 247      35.731  25.305  14.152  1.00 16.27           C
ATOM   1973  CB  TYR A 247      34.216  25.179  14.180  1.00 17.14           C
ATOM   1974  CG  TYR A 247      33.738  23.751  14.320  1.00 18.61           C
ATOM   1975  CD1 TYR A 247      33.471  23.224  15.593  1.00 19.38           C
ATOM   1976  CE1 TYR A 247      33.051  21.928  15.748  1.00 17.91           C
ATOM   1977  CZ  TYR A 247      32.850  21.117  14.611  1.00 17.56           C
ATOM   1978  OH  TYR A 247      32.432  19.839  14.830  1.00 17.86           O
ATOM   1979  CE2 TYR A 247      33.130  21.596  13.317  1.00 15.99           C
ATOM   1980  CD2 TYR A 247      33.565  22.929  13.193  1.00 16.62           C
ATOM   1981  C   TYR A 247      36.145  26.756  13.824  1.00 17.34           C
ATOM   1982  O   TYR A 247      35.324  27.675  13.821  1.00 16.41           O
ATOM   1983  N   PRO A 248      37.446  26.965  13.625  1.00 18.22           N
ATOM   1984  CA  PRO A 248      37.984  28.332  13.581  1.00 18.72           C
ATOM   1985  CB  PRO A 248      39.511  28.130  13.518  1.00 18.63           C
ATOM   1986  CG  PRO A 248      39.677  26.696  12.957  1.00 20.01           C
ATOM   1987  CD  PRO A 248      38.499  25.921  13.514  1.00 18.08           C
ATOM   1988  C   PRO A 248      37.506  29.203  12.402  1.00 18.80           C
ATOM   1989  O   PRO A 248      37.644  30.435  12.488  1.00 18.25           O
ATOM   1990  N   ASN A 249      36.996  28.577  11.337  1.00 18.59           N
ATOM   1991  CA  ASN A 249      36.523  29.304  10.128  1.00 19.72           C
ATOM   1992  CB  ASN A 249      37.282  28.808   8.874  1.00 19.60           C
ATOM   1993  CG  ASN A 249      38.775  29.062   8.975  1.00 22.13           C
ATOM   1994  OD1 ASN A 249      39.208  30.151   9.372  1.00 23.85           O
ATOM   1995  ND2 ASN A 249      39.576  28.043   8.653  1.00 22.75           N
ATOM   1996  C   ASN A 249      35.011  29.259   9.954  1.00 19.66           C
ATOM   1997  O   ASN A 249      34.448  29.725   8.935  1.00 20.67           O
ATOM   1998  N   ALA A 250      34.315  28.684  10.945  1.00 19.23           N
ATOM   1999  CA  ALA A 250      32.859  28.568  10.853  1.00 17.45           C
ATOM   2000  CB  ALA A 250      32.298  27.427  11.749  1.00 16.54           C
ATOM   2001  C   ALA A 250      32.163  29.898  11.193  1.00 17.25           C
ATOM   2002  O   ALA A 250      32.738  30.774  11.866  1.00 17.21           O
ATOM   2003  N   CYS A 251      30.927  30.037  10.711  1.00 17.01           N
ATOM   2004  CA  CYS A 251      30.092  31.183  11.106  1.00 17.21           C
ATOM   2005  CB  CYS A 251      29.026  31.503  10.031  1.00 17.64           C
ATOM   2006  SG  CYS A 251      27.823  30.211   9.792  1.00 19.30           S
ATOM   2007  C   CYS A 251      29.452  30.871  12.467  1.00 17.08           C
ATOM   2008  O   CYS A 251      29.372  29.686  12.885  1.00 15.53           O
ATOM   2009  N   SER A 252      28.989  31.916  13.170  1.00 16.93           N
ATOM   2010  CA  SER A 252      28.309  31.706  14.446  1.00 16.48           C
ATOM   2011  CB  SER A 252      27.855  33.056  15.071  1.00 17.25           C
ATOM   2012  OG  SER A 252      28.932  33.994  15.111  1.00 15.91           O
ATOM   2013  C   SER A 252      27.146  30.715  14.394  1.00 17.11           C
ATOM   2014  O   SER A 252      27.009  29.905  15.305  1.00 17.28           O
ATOM   2015  N   ALA A 253      26.326  30.748  13.330  1.00 16.03           N
ATOM   2016  CA  ALA A 253      25.168  29.886  13.264  1.00 17.26           C
ATOM   2017  CB  ALA A 253      24.316  30.203  11.977  1.00 16.23           C
ATOM   2018  C   ALA A 253      25.624  28.421  13.279  1.00 16.01           C
ATOM   2019  O   ALA A 253      25.020  27.560  13.926  1.00 17.01           O
ATOM   2020  N   VAL A 254      26.709  28.135  12.566  1.00 16.39           N
ATOM   2021  CA  VAL A 254      27.248  26.780  12.533  1.00 16.06           C
ATOM   2022  CB  VAL A 254      28.255  26.612  11.365  1.00 16.54           C
ATOM   2023  CG1 VAL A 254      29.002  25.272  11.497  1.00 16.67           C
ATOM   2024  CG2 VAL A 254      27.466  26.631  10.012  1.00 17.94           C
ATOM   2025  C   VAL A 254      27.862  26.404  13.883  1.00 15.73           C
ATOM   2026  O   VAL A 254      27.721  25.266  14.355  1.00 14.97           O
ATOM   2027  N   ILE A 255      28.581  27.341  14.491  1.00 16.21           N
ATOM   2028  CA  ILE A 255      29.077  27.106  15.842  1.00 16.62           C
ATOM   2029  CB  ILE A 255      29.839  28.340  16.375  1.00 17.28           C
ATOM   2030  CG1 ILE A 255      31.207  28.379  15.682  1.00 20.45           C
ATOM   2031  CD1 ILE A 255      31.877  29.674  15.856  1.00 25.21           C
ATOM   2032  CG2 ILE A 255      30.109  28.190  17.868  1.00 17.41           C
ATOM   2033  C   ILE A 255      27.933  26.676  16.772  1.00 15.69           C
ATOM   2034  O   ILE A 255      28.123  25.782  17.587  1.00 14.08           O
ATOM   2035  N   LEU A 256      26.754  27.289  16.662  1.00 16.22           N
ATOM   2036  CA  LEU A 256      25.611  26.858  17.524  1.00 16.07           C
ATOM   2037  CB  LEU A 256      24.370  27.726  17.294  1.00 16.31           C
ATOM   2038  CG  LEU A 256      24.525  29.205  17.665  1.00 18.54           C
ATOM   2039  CD1 LEU A 256      23.259  29.985  17.404  1.00 19.95           C
ATOM   2040  CD2 LEU A 256      24.968  29.398  19.136  1.00 17.29           C
ATOM   2041  C   LEU A 256      25.240  25.373  17.331  1.00 16.60           C
ATOM   2042  O   LEU A 256      25.092  24.623  18.293  1.00 16.83           O
ATOM   2043  N   ASN A 257      25.070  24.972  16.069  1.00 17.22           N
ATOM   2044  CA  ASN A 257      24.771  23.579  15.740  1.00 16.71           C
ATOM   2045  CB  ASN A 257      24.698  23.451  14.206  1.00 17.16           C
ATOM   2046  CG  ASN A 257      24.491  22.017  13.757  1.00 19.56           C
ATOM   2047  OD1 ASN A 257      25.372  21.436  13.109  1.00 19.46           O
ATOM   2048  ND2 ASN A 257      23.354  21.427  14.137  1.00 18.30           N
ATOM   2049  C   ASN A 257      25.857  22.637  16.324  1.00 16.65           C
ATOM   2050  O   ASN A 257      25.536  21.637  16.989  1.00 16.29           O
ATOM   2051  N   ARG A 258      27.119  22.930  16.044  1.00 16.08           N
ATOM   2052  CA  ARG A 258      28.263  22.143  16.551  1.00 15.70           C
ATOM   2053  CB  ARG A 258      29.582  22.573  15.891  1.00 16.86           C
ATOM   2054  CG  ARG A 258      29.630  22.326  14.390  1.00 16.20           C
ATOM   2055  CD  ARG A 258      29.180  20.906  13.960  1.00 16.16           C
ATOM   2056  NE  ARG A 258      29.651  20.624  12.607  1.00 17.27           N
ATOM   2057  CZ  ARG A 258      29.011  20.973  11.487  1.00 20.13           C
ATOM   2058  NH1 ARG A 258      27.837  21.587  11.555  1.00 16.07           N
ATOM   2059  NH2 ARG A 258      29.551  20.689  10.286  1.00 19.10           N
ATOM   2060  C   ARG A 258      28.406  22.131  18.088  1.00 15.11           C
ATOM   2061  O   ARG A 258      28.800  21.097  18.664  1.00 15.22           O
ATOM   2062  N   PHE A 259      28.110  23.269  18.720  1.00 14.11           N
ATOM   2063  CA  PHE A 259      28.022  23.414  20.183  1.00 13.84           C
ATOM   2064  CB  PHE A 259      27.576  24.847  20.522  1.00 14.31           C
ATOM   2065  CG  PHE A 259      27.302  25.123  21.971  1.00 15.40           C
ATOM   2066  CD1 PHE A 259      28.271  25.780  22.779  1.00 16.58           C
ATOM   2067  CE1 PHE A 259      27.987  26.119  24.095  1.00 16.86           C
ATOM   2068  CZ  PHE A 259      26.710  25.822  24.633  1.00 15.77           C
ATOM   2069  CE2 PHE A 259      25.749  25.178  23.834  1.00 17.70           C
ATOM   2070  CD2 PHE A 259      26.046  24.866  22.509  1.00 17.49           C
ATOM   2071  C   PHE A 259      27.058  22.354  20.708  1.00 13.11           C
ATOM   2072  O   PHE A 259      27.410  21.553  21.560  1.00 14.89           O
ATOM   2073  N   PHE A 260      25.852  22.279  20.154  1.00 13.89           N
ATOM   2074  CA  PHE A 260      24.905  21.314  20.706  1.00 13.66           C
ATOM   2075  CB  PHE A 260      23.499  21.581  20.177  1.00 14.58           C
ATOM   2076  CG  PHE A 260      22.935  22.893  20.622  1.00 14.17           C
ATOM   2077  CD1 PHE A 260      22.432  23.790  19.682  1.00 15.89           C
ATOM   2078  CE1 PHE A 260      21.891  25.030  20.106  1.00 16.73           C
ATOM   2079  CZ  PHE A 260      21.857  25.339  21.460  1.00 15.74           C
ATOM   2080  CE2 PHE A 260      22.359  24.449  22.404  1.00 16.64           C
ATOM   2081  CD2 PHE A 260      22.883  23.217  21.977  1.00 16.90           C
ATOM   2082  C   PHE A 260      25.349  19.862  20.436  1.00 15.73           C
ATOM   2083  O   PHE A 260      25.223  18.997  21.319  1.00 15.73           O
ATOM   2084  N   ILE A 261      25.891  19.605  19.248  1.00 15.78           N
ATOM   2085  CA  ILE A 261      26.310  18.213  18.902  1.00 15.67           C
ATOM   2086  CB  ILE A 261      26.708  18.127  17.405  1.00 16.42           C
ATOM   2087  CG1 ILE A 261      25.453  18.214  16.517  1.00 16.99           C
ATOM   2088  CD1 ILE A 261      25.732  18.516  15.024  1.00 17.23           C
ATOM   2089  CG2 ILE A 261      27.463  16.781  17.138  1.00 16.12           C
ATOM   2090  C   ILE A 261      27.482  17.782  19.813  1.00 16.15           C
ATOM   2091  O   ILE A 261      27.385  16.761  20.516  1.00 17.17           O
ATOM   2092  N   ILE A 262      28.524  18.609  19.856  1.00 15.39           N
ATOM   2093  CA AILE A 262      29.742  18.242  20.575  0.50 15.79           C
ATOM   2094  CA BILE A 262      29.782  18.331  20.593  0.50 15.48           C
ATOM   2095  CB AILE A 262      30.900  19.200  20.231  0.50 15.78           C
ATOM   2096  CB BILE A 262      30.833  19.507  20.415  0.50 14.78           C
ATOM   2097  CG1AILE A 262      31.360  18.922  18.785  0.50 16.25           C
ATOM   2098  CG1BILE A 262      31.473  19.518  19.012  0.50 15.16           C
ATOM   2099  CD1AILE A 262      32.515  19.749  18.322  0.50 15.01           C
ATOM   2100  CD1BILE A 262      32.327  18.294  18.691  0.50 11.06           C
ATOM   2101  CG2AILE A 262      32.047  19.055  21.252  0.50 15.61           C
ATOM   2102  CG2BILE A 262      31.911  19.471  21.525  0.50 15.13           C
ATOM   2103  C   ILE A 262      29.511  18.138  22.077  1.00 16.07           C
ATOM   2104  O   ILE A 262      30.007  17.205  22.702  1.00 15.82           O
ATOM   2105  N   LEU A 263      28.710  19.047  22.639  1.00 15.54           N
ATOM   2106  CA  LEU A 263      28.504  19.003  24.069  1.00 16.19           C
ATOM   2107  CB  LEU A 263      28.129  20.387  24.593  1.00 16.20           C
ATOM   2108  CG  LEU A 263      29.223  21.445  24.449  1.00 16.54           C
ATOM   2109  CD1 LEU A 263      28.619  22.833  24.859  1.00 15.69           C
ATOM   2110  CD2 LEU A 263      30.568  21.118  25.262  1.00 15.83           C
ATOM   2111  C   LEU A 263      27.503  17.920  24.500  1.00 16.98           C
ATOM   2112  O   LEU A 263      27.601  17.407  25.605  1.00 16.99           O
ATOM   2113  N   SER A 264      26.567  17.572  23.632  1.00 17.45           N
ATOM   2114  CA  SER A 264      25.697  16.422  23.890  1.00 17.86           C
ATOM   2115  CB  SER A 264      24.456  16.416  22.970  1.00 17.41           C
ATOM   2116  OG  SER A 264      24.828  16.148  21.643  1.00 19.63           O
ATOM   2117  C   SER A 264      26.465  15.103  23.760  1.00 17.49           C
ATOM   2118  O   SER A 264      26.112  14.124  24.444  1.00 18.40           O
ATOM   2119  N   GLU A 265      27.501  15.059  22.901  1.00 17.58           N
ATOM   2120  CA  GLU A 265      28.276  13.819  22.689  1.00 17.33           C
ATOM   2121  CB  GLU A 265      28.802  13.731  21.232  1.00 17.47           C
ATOM   2122  CG  GLU A 265      27.726  13.617  20.136  1.00 20.29           C
ATOM   2123  CD  GLU A 265      27.022  12.256  20.091  1.00 26.80           C
ATOM   2124  OE1 GLU A 265      25.787  12.207  19.888  1.00 27.58           O
ATOM   2125  OE2 GLU A 265      27.701  11.241  20.268  1.00 27.02           O
ATOM   2126  C   GLU A 265      29.438  13.681  23.660  1.00 17.90           C
ATOM   2127  O   GLU A 265      29.978  12.604  23.813  1.00 18.06           O
ATOM   2128  N   TRP A 266      29.766  14.768  24.349  1.00 18.17           N
ATOM   2129  CA  TRP A 266      30.923  14.877  25.241  1.00 18.21           C
ATOM   2130  CB  TRP A 266      30.915  16.286  25.846  1.00 18.51           C
ATOM   2131  CG  TRP A 266      32.197  16.734  26.471  1.00 19.24           C
ATOM   2132  CD1 TRP A 266      32.626  16.453  27.750  1.00 20.61           C
ATOM   2133  NE1 TRP A 266      33.830  17.069  27.987  1.00 18.52           N
ATOM   2134  CE2 TRP A 266      34.239  17.721  26.849  1.00 20.42           C
ATOM   2135  CD2 TRP A 266      33.224  17.539  25.868  1.00 19.90           C
ATOM   2136  CE3 TRP A 266      33.381  18.161  24.602  1.00 20.44           C
ATOM   2137  CZ3 TRP A 266      34.539  18.929  24.355  1.00 18.80           C
ATOM   2138  CH2 TRP A 266      35.535  19.067  25.363  1.00 19.32           C
ATOM   2139  CZ2 TRP A 266      35.383  18.482  26.619  1.00 17.97           C
ATOM   2140  C   TRP A 266      30.899  13.825  26.348  1.00 19.60           C
ATOM   2141  O   TRP A 266      29.842  13.602  26.970  1.00 19.36           O
ATOM   2142  N   ASN A 267      32.073  13.235  26.625  1.00 20.28           N
ATOM   2143  CA AASN A 267      32.229  12.211  27.662  0.50 20.72           C
ATOM   2144  CA BASN A 267      32.166  12.198  27.671  0.50 20.46           C
ATOM   2145  CB AASN A 267      33.472  11.354  27.380  0.50 21.63           C
ATOM   2146  CB BASN A 267      33.253  11.149  27.362  0.50 21.18           C
ATOM   2147  CG AASN A 267      33.269  10.365  26.248  0.50 24.54           C
ATOM   2148  CG BASN A 267      33.032   9.810  28.101  0.50 22.80           C
ATOM   2149  OD1AASN A 267      32.239  10.365  25.572  0.50 28.06           O
ATOM   2150  OD1BASN A 267      32.213   9.704  29.025  0.50 24.18           O
ATOM   2151  ND2AASN A 267      34.269   9.504  26.038  0.50 25.44           N
ATOM   2152  ND2BASN A 267      33.754   8.771  27.668  0.50 25.11           N
ATOM   2153  C   ASN A 267      32.370  12.831  29.058  1.00 20.07           C
ATOM   2154  O   ASN A 267      33.452  12.765  29.649  1.00 19.67           O
ATOM   2155  N   TRP A 268      31.304  13.445  29.582  1.00 18.64           N
ATOM   2156  CA  TRP A 268      31.347  14.030  30.929  1.00 19.02           C
ATOM   2157  CB  TRP A 268      29.957  14.617  31.266  1.00 18.34           C
ATOM   2158  CG  TRP A 268      29.543  15.663  30.242  1.00 17.76           C
ATOM   2159  CD1 TRP A 268      28.529  15.577  29.302  1.00 17.96           C
ATOM   2160  NE1 TRP A 268      28.484  16.734  28.551  1.00 17.64           N
ATOM   2161  CE2 TRP A 268      29.463  17.590  28.986  1.00 16.09           C
ATOM   2162  CD2 TRP A 268      30.150  16.945  30.055  1.00 17.45           C
ATOM   2163  CE3 TRP A 268      31.218  17.614  30.669  1.00 16.78           C
ATOM   2164  CZ3 TRP A 268      31.555  18.925  30.212  1.00 17.76           C
ATOM   2165  CH2 TRP A 268      30.834  19.535  29.166  1.00 17.08           C
ATOM   2166  CZ2 TRP A 268      29.805  18.879  28.526  1.00 19.05           C
ATOM   2167  C   TRP A 268      31.712  12.882  31.878  1.00 19.32           C
ATOM   2168  O   TRP A 268      31.218  11.760  31.668  1.00 18.62           O
ATOM   2169  N   PRO A 269      32.534  13.117  32.913  1.00 19.83           N
ATOM   2170  CA  PRO A 269      33.035  14.428  33.335  1.00 19.59           C
ATOM   2171  CB  PRO A 269      33.211  14.227  34.859  1.00 18.74           C
ATOM   2172  CG  PRO A 269      33.739  12.777  34.930  1.00 21.74           C
ATOM   2173  CD  PRO A 269      32.921  12.059  33.866  1.00 20.13           C
ATOM   2174  C   PRO A 269      34.385  14.872  32.789  1.00 19.07           C
ATOM   2175  O   PRO A 269      35.064  15.672  33.457  1.00 20.25           O
ATOM   2176  N   GLN A 270      34.825  14.407  31.622  1.00 18.91           N
ATOM   2177  CA AGLN A 270      36.023  14.987  30.971  0.50 18.65           C
ATOM   2178  CA BGLN A 270      36.063  14.985  31.164  0.50 18.61           C
ATOM   2179  CB AGLN A 270      36.200  14.471  29.528  0.50 17.94           C
ATOM   2180  CB BGLN A 270      36.675  14.222  29.999  0.50 19.60           C
ATOM   2181  CG AGLN A 270      36.910  13.087  29.479  0.50 21.32           C
ATOM   2182  CG BGLN A 270      37.109  12.747  30.395  0.50 21.23           C
ATOM   2183  CD AGLN A 270      37.306  12.607  28.085  0.50 20.58           C
ATOM   2184  CD BGLN A 270      37.561  12.530  31.865  0.50 24.39           C
ATOM   2185  OE1AGLN A 270      38.512  12.484  27.758  0.50 26.29           O
ATOM   2186  OE1BGLN A 270      38.515  13.147  32.351  0.50 25.09           O
ATOM   2187  NE2AGLN A 270      36.306  12.316  27.262  0.50 24.26           N
ATOM   2188  NE2BGLN A 270      36.865  11.635  32.559  0.50 26.56           N
ATOM   2189  C   GLN A 270      35.900  16.511  30.975  1.00 17.69           C
ATOM   2190  O   GLN A 270      34.857  17.008  30.571  1.00 17.25           O
ATOM   2191  N   PRO A 271      36.929  17.245  31.401  1.00 17.89           N
ATOM   2192  CA  PRO A 271      36.831  18.719  31.496  1.00 17.48           C
ATOM   2193  CB  PRO A 271      38.038  19.101  32.372  1.00 19.05           C
ATOM   2194  CG  PRO A 271      39.046  18.061  32.028  1.00 17.89           C
ATOM   2195  CD  PRO A 271      38.223  16.748  31.909  1.00 17.92           C
ATOM   2196  C   PRO A 271      36.916  19.466  30.186  1.00 17.40           C
ATOM   2197  O   PRO A 271      37.650  19.066  29.244  1.00 16.60           O
ATOM   2198  N   VAL A 272      36.203  20.592  30.151  1.00 15.86           N
ATOM   2199  CA  VAL A 272      36.363  21.548  29.051  1.00 16.28           C
ATOM   2200  CB  VAL A 272      35.039  22.336  28.764  1.00 15.75           C
ATOM   2201  CG1 VAL A 272      35.273  23.392  27.696  1.00 14.34           C
ATOM   2202  CG2 VAL A 272      33.903  21.366  28.355  1.00 17.05           C
ATOM   2203  C   VAL A 272      37.470  22.527  29.434  1.00 16.03           C
ATOM   2204  O   VAL A 272      37.353  23.228  30.435  1.00 14.83           O
ATOM   2205  N   ILE A 273      38.564  22.522  28.665  1.00 14.86           N
ATOM   2206  CA  ILE A 273      39.725  23.349  28.967  1.00 17.43           C
ATOM   2207  CB  ILE A 273      40.896  22.401  29.435  1.00 17.43           C
ATOM   2208  CG1 ILE A 273      40.556  21.723  30.764  1.00 19.22           C
ATOM   2209  CD1 ILE A 273      41.536  20.563  31.142  1.00 19.33           C
ATOM   2210  CG2 ILE A 273      42.218  23.122  29.482  1.00 19.43           C
ATOM   2211  C   ILE A 273      40.146  24.116  27.709  1.00 16.80           C
ATOM   2212  O   ILE A 273      40.242  23.519  26.630  1.00 18.07           O
ATOM   2213  N   LEU A 274      40.409  25.419  27.848  1.00 16.52           N
ATOM   2214  CA  LEU A 274      40.712  26.304  26.710  1.00 16.65           C
ATOM   2215  CB  LEU A 274      40.110  27.699  26.975  1.00 16.33           C
ATOM   2216  CG  LEU A 274      38.580  27.746  27.157  1.00 14.31           C
ATOM   2217  CD1 LEU A 274      38.016  29.220  27.375  1.00 15.50           C
ATOM   2218  CD2 LEU A 274      37.888  27.109  25.913  1.00 17.64           C
ATOM   2219  C   LEU A 274      42.199  26.480  26.433  1.00 17.09           C
ATOM   2220  O   LEU A 274      42.602  27.046  25.400  1.00 17.94           O
ATOM   2221  N   LYS A 275      43.030  26.082  27.391  1.00 18.66           N
ATOM   2222  CA  LYS A 275      44.470  26.272  27.248  1.00 20.30           C
ATOM   2223  CB  LYS A 275      44.868  27.760  27.359  1.00 21.33           C
ATOM   2224  CG  LYS A 275      45.210  28.231  28.732  1.00 23.72           C
ATOM   2225  CD  LYS A 275      45.929  29.573  28.760  1.00 22.12           C
ATOM   2226  CE  LYS A 275      46.641  29.699  30.099  1.00 25.87           C
ATOM   2227  NZ  LYS A 275      46.713  31.129  30.626  1.00 23.21           N
ATOM   2228  C   LYS A 275      45.138  25.380  28.306  1.00 20.50           C
ATOM   2229  O   LYS A 275      44.515  25.075  29.312  1.00 20.13           O
ATOM   2230  N   PRO A 276      46.360  24.920  28.073  1.00 21.07           N
ATOM   2231  CA  PRO A 276      47.018  24.021  29.048  1.00 22.29           C
ATOM   2232  CB  PRO A 276      48.430  23.886  28.500  1.00 23.09           C
ATOM   2233  CG  PRO A 276      48.232  24.062  27.032  1.00 23.00           C
ATOM   2234  CD  PRO A 276      47.222  25.191  26.911  1.00 22.34           C
ATOM   2235  C   PRO A 276      46.996  24.616  30.454  1.00 22.92           C
ATOM   2236  O   PRO A 276      47.304  25.797  30.638  1.00 23.25           O
ATOM   2237  N   ILE A 277      46.559  23.824  31.427  1.00 24.22           N
ATOM   2238  CA  ILE A 277      46.499  24.284  32.806  1.00 25.55           C
ATOM   2239  CB  ILE A 277      45.776  23.254  33.719  1.00 25.50           C
ATOM   2240  CG1 ILE A 277      44.335  23.007  33.260  1.00 25.35           C
ATOM   2241  CD1 ILE A 277      43.530  22.051  34.135  1.00 26.10           C
ATOM   2242  CG2 ILE A 277      45.874  23.677  35.207  1.00 24.70           C
ATOM   2243  C   ILE A 277      47.921  24.585  33.333  1.00 27.41           C
ATOM   2244  O   ILE A 277      48.793  23.692  33.354  1.00 27.33           O
ATOM   2245  N   GLU A 278      48.137  25.830  33.758  1.00 28.99           N
ATOM   2246  CA  GLU A 278      49.458  26.277  34.232  1.00 31.75           C
ATOM   2247  CB  GLU A 278      49.569  27.804  34.237  1.00 31.72           C
ATOM   2248  CG  GLU A 278      49.638  28.472  32.864  1.00 32.73           C
ATOM   2249  CD  GLU A 278      49.364  29.967  32.945  1.00 33.63           C
ATOM   2250  OE1 GLU A 278      50.332  30.744  33.153  1.00 37.34           O
ATOM   2251  OE2 GLU A 278      48.181  30.369  32.847  1.00 34.18           O
ATOM   2252  C   GLU A 278      49.769  25.736  35.623  1.00 33.38           C
ATOM   2253  O   GLU A 278      48.936  25.795  36.536  1.00 32.50           O
ATOM   2254  N   ASP A 279      50.978  25.201  35.766  1.00 35.49           N
ATOM   2255  CA  ASP A 279      51.499  24.767  37.062  1.00 37.99           C
ATOM   2256  CB  ASP A 279      52.610  23.722  36.867  1.00 38.40           C
ATOM   2257  CG  ASP A 279      52.062  22.371  36.434  1.00 41.96           C
ATOM   2258  OD1 ASP A 279      52.608  21.774  35.473  1.00 46.26           O
ATOM   2259  OD2 ASP A 279      51.066  21.837  36.983  1.00 46.16           O
ATOM   2260  C   ASP A 279      52.023  25.961  37.845  1.00 37.92           C
ATOM   2261  O   ASP A 279      52.464  26.953  37.275  1.00 38.57           O
ATOM   2262  N   GLY A 280      51.971  25.859  39.162  1.00 38.71           N
ATOM   2263  CA  GLY A 280      52.453  26.932  40.016  1.00 38.82           C
ATOM   2264  C   GLY A 280      53.267  26.384  41.167  1.00 39.36           C
ATOM   2265  O   GLY A 280      53.537  25.178  41.227  1.00 38.57           O
ATOM   2266  N   PRO A 281      53.681  27.275  42.067  1.00 40.06           N
ATOM   2267  CA  PRO A 281      54.382  26.860  43.297  1.00 40.62           C
ATOM   2268  CB  PRO A 281      54.715  28.194  43.991  1.00 40.43           C
ATOM   2269  CG  PRO A 281      53.810  29.228  43.347  1.00 40.88           C
ATOM   2270  CD  PRO A 281      53.561  28.746  41.949  1.00 39.79           C
ATOM   2271  C   PRO A 281      53.517  25.962  44.200  1.00 40.94           C
ATOM   2272  O   PRO A 281      52.332  25.781  43.942  1.00 40.36           O
ATOM   2273  N   LEU A 282      54.112  25.477  45.290  1.00 41.31           N
ATOM   2274  CA  LEU A 282      53.598  24.347  46.097  1.00 41.13           C
ATOM   2275  CB  LEU A 282      54.611  23.924  47.199  1.00 41.35           C
ATOM   2276  CG  LEU A 282      54.535  22.430  47.566  1.00 42.04           C
ATOM   2277  CD1 LEU A 282      54.813  21.503  46.370  1.00 42.89           C
ATOM   2278  CD2 LEU A 282      55.475  22.065  48.715  1.00 41.56           C
ATOM   2279  C   LEU A 282      52.130  24.042  46.560  1.00 40.51           C
ATOM   2280  O   LEU A 282      51.694  22.978  46.150  1.00 41.55           O
ATOM   2281  N   GLN A 283      51.291  24.798  47.309  1.00 39.41           N
ATOM   2282  CA AGLN A 283      51.349  26.223  47.674  0.50 38.37           C
ATOM   2283  CA BGLN A 283      51.353  26.229  47.680  0.50 38.64           C
ATOM   2284  CB AGLN A 283      52.625  26.880  47.212  0.50 38.65           C
ATOM   2285  CB BGLN A 283      52.688  26.910  47.339  0.50 39.06           C
ATOM   2286  CG AGLN A 283      53.103  28.019  48.043  0.50 38.37           C
ATOM   2287  CG BGLN A 283      52.604  28.331  46.775  0.50 40.17           C
ATOM   2288  CD AGLN A 283      54.491  28.406  47.618  0.50 37.94           C
ATOM   2289  CD BGLN A 283      52.447  29.396  47.829  0.50 40.75           C
ATOM   2290  OE1AGLN A 283      55.277  27.544  47.215  0.50 38.74           O
ATOM   2291  OE1BGLN A 283      52.206  29.091  48.989  0.50 41.20           O
ATOM   2292  NE2AGLN A 283      54.797  29.690  47.674  0.50 37.52           N
ATOM   2293  NE2BGLN A 283      52.590  30.657  47.428  0.50 41.10           N
ATOM   2294  C   GLN A 283      50.145  26.949  47.046  1.00 37.53           C
ATOM   2295  O   GLN A 283      49.322  27.551  47.747  1.00 37.42           O
ATOM   2296  N   VAL A 284      50.041  26.870  45.719  1.00 35.68           N
ATOM   2297  CA  VAL A 284      48.905  27.446  44.990  1.00 33.38           C
ATOM   2298  CB  VAL A 284      49.368  28.292  43.764  1.00 34.36           C
ATOM   2299  CG1 VAL A 284      48.157  28.834  42.986  1.00 33.89           C
ATOM   2300  CG2 VAL A 284      50.228  29.456  44.214  1.00 34.04           C
ATOM   2301  C   VAL A 284      47.995  26.295  44.536  1.00 30.99           C
ATOM   2302  O   VAL A 284      48.480  25.321  43.993  1.00 30.85           O
ATOM   2303  N   ARG A 285      46.696  26.408  44.789  1.00 28.72           N
ATOM   2304  CA  ARG A 285      45.761  25.352  44.425  1.00 27.77           C
ATOM   2305  CB  ARG A 285      44.589  25.293  45.398  1.00 27.76           C
ATOM   2306  CG  ARG A 285      43.636  24.185  45.061  1.00 29.21           C
ATOM   2307  CD  ARG A 285      42.677  23.776  46.161  1.00 32.32           C
ATOM   2308  NE  ARG A 285      41.614  22.948  45.611  1.00 34.95           N
ATOM   2309  CZ  ARG A 285      40.568  22.481  46.286  1.00 37.55           C
ATOM   2310  NH1 ARG A 285      40.421  22.741  47.584  1.00 40.88           N
ATOM   2311  NH2 ARG A 285      39.665  21.747  45.656  1.00 37.10           N
ATOM   2312  C   ARG A 285      45.230  25.533  43.005  1.00 25.69           C
ATOM   2313  O   ARG A 285      44.721  26.608  42.664  1.00 24.47           O
ATOM   2314  N   VAL A 286      45.373  24.480  42.200  1.00 24.32           N
ATOM   2315  CA  VAL A 286      44.848  24.453  40.840  1.00 24.04           C
ATOM   2316  CB  VAL A 286      45.994  24.363  39.810  1.00 24.87           C
ATOM   2317  CG1 VAL A 286      45.473  24.376  38.412  1.00 26.86           C
ATOM   2318  CG2 VAL A 286      46.980  25.543  39.979  1.00 25.93           C
ATOM   2319  C   VAL A 286      43.858  23.273  40.747  1.00 22.67           C
ATOM   2320  O   VAL A 286      44.008  22.285  41.461  1.00 20.82           O
ATOM   2321  N   TRP A 287      42.832  23.383  39.900  1.00 20.94           N
ATOM   2322  CA  TRP A 287      41.893  22.287  39.672  1.00 20.34           C
ATOM   2323  CB  TRP A 287      40.894  22.654  38.527  1.00 19.66           C
ATOM   2324  CG  TRP A 287      39.805  21.665  38.357  1.00 19.01           C
ATOM   2325  CD1 TRP A 287      38.654  21.567  39.106  1.00 17.05           C
ATOM   2326  NE1 TRP A 287      37.913  20.490  38.677  1.00 18.13           N
ATOM   2327  CE2 TRP A 287      38.558  19.884  37.624  1.00 18.96           C
ATOM   2328  CD2 TRP A 287      39.757  20.597  37.402  1.00 17.91           C
ATOM   2329  CE3 TRP A 287      40.620  20.158  36.383  1.00 17.79           C
ATOM   2330  CZ3 TRP A 287      40.230  19.028  35.602  1.00 18.50           C
ATOM   2331  CH2 TRP A 287      39.026  18.358  35.851  1.00 20.26           C
ATOM   2332  CZ2 TRP A 287      38.181  18.756  36.856  1.00 18.32           C
ATOM   2333  C   TRP A 287      42.675  21.031  39.305  1.00 20.78           C
ATOM   2334  O   TRP A 287      43.477  21.034  38.362  1.00 20.32           O
ATOM   2335  N   ASN A 288      42.438  19.965  40.063  1.00 22.22           N
ATOM   2336  CA  ASN A 288      43.125  18.702  39.864  1.00 23.34           C
ATOM   2337  CB  ASN A 288      44.545  18.777  40.428  1.00 24.79           C
ATOM   2338  CG  ASN A 288      45.410  17.607  39.972  1.00 25.93           C
ATOM   2339  OD1 ASN A 288      44.906  16.581  39.516  1.00 29.22           O
ATOM   2340  ND2 ASN A 288      46.719  17.776  40.079  1.00 29.57           N
ATOM   2341  C   ASN A 288      42.371  17.559  40.556  1.00 23.90           C
ATOM   2342  O   ASN A 288      42.517  17.353  41.786  1.00 21.82           O
ATOM   2343  N   PRO A 289      41.573  16.828  39.773  1.00 23.80           N
ATOM   2344  CA  PRO A 289      40.697  15.773  40.330  1.00 25.08           C
ATOM   2345  CB  PRO A 289      39.815  15.366  39.148  1.00 24.64           C
ATOM   2346  CG  PRO A 289      40.504  15.859  37.913  1.00 24.96           C
ATOM   2347  CD  PRO A 289      41.424  16.982  38.311  1.00 24.63           C
ATOM   2348  C   PRO A 289      41.499  14.568  40.858  1.00 26.48           C
ATOM   2349  O   PRO A 289      40.942  13.706  41.546  1.00 27.18           O
ATOM   2350  N   LYS A 290      42.786  14.514  40.539  1.00 27.01           N
ATOM   2351  CA ALYS A 290      43.701  13.461  41.027  0.50 28.04           C
ATOM   2352  CA BLYS A 290      43.577  13.414  41.067  0.50 27.83           C
ATOM   2353  CB ALYS A 290      44.954  13.405  40.154  0.50 28.12           C
ATOM   2354  CB BLYS A 290      44.620  12.944  40.051  0.50 28.12           C
ATOM   2355  CG ALYS A 290      44.750  12.726  38.813  0.50 30.92           C
ATOM   2356  CG BLYS A 290      43.984  12.501  38.689  0.50 28.63           C
ATOM   2357  CD ALYS A 290      45.979  12.854  37.937  0.50 33.13           C
ATOM   2358  CD BLYS A 290      42.597  11.861  38.861  0.50 29.80           C
ATOM   2359  CE ALYS A 290      46.016  11.749  36.904  0.50 34.79           C
ATOM   2360  CE BLYS A 290      41.755  11.867  37.581  0.50 29.99           C
ATOM   2361  NZ ALYS A 290      46.941  12.061  35.777  0.50 36.66           N
ATOM   2362  NZ BLYS A 290      40.277  11.901  37.875  0.50 31.20           N
ATOM   2363  C   LYS A 290      44.115  13.692  42.470  1.00 28.29           C
ATOM   2364  O   LYS A 290      44.398  12.757  43.214  1.00 28.91           O
ATOM   2365  N   ILE A 291      44.169  14.957  42.859  1.00 27.79           N
ATOM   2366  CA  ILE A 291      44.622  15.334  44.204  1.00 28.20           C
ATOM   2367  CB  ILE A 291      45.601  16.556  44.110  1.00 28.63           C
ATOM   2368  CG1 ILE A 291      46.890  16.175  43.393  1.00 30.13           C
ATOM   2369  CD1 ILE A 291      47.836  17.356  43.237  1.00 29.10           C
ATOM   2370  CG2 ILE A 291      45.923  17.100  45.470  1.00 30.03           C
ATOM   2371  C   ILE A 291      43.446  15.669  45.110  1.00 27.53           C
ATOM   2372  O   ILE A 291      43.478  15.372  46.317  1.00 27.68           O
ATOM   2373  N   TYR A 292      42.409  16.296  44.535  1.00 26.07           N
ATOM   2374  CA  TYR A 292      41.299  16.810  45.326  1.00 25.20           C
ATOM   2375  CB  TYR A 292      41.063  18.301  45.033  1.00 26.11           C
ATOM   2376  CG  TYR A 292      42.238  19.146  45.412  1.00 27.32           C
ATOM   2377  CD1 TYR A 292      43.144  19.571  44.445  1.00 27.14           C
ATOM   2378  CE1 TYR A 292      44.238  20.356  44.786  1.00 29.85           C
ATOM   2379  CZ  TYR A 292      44.465  20.681  46.124  1.00 28.38           C
ATOM   2380  OH  TYR A 292      45.560  21.456  46.455  1.00 31.05           O
ATOM   2381  CE2 TYR A 292      43.587  20.271  47.114  1.00 28.82           C
ATOM   2382  CD2 TYR A 292      42.478  19.480  46.756  1.00 28.10           C
ATOM   2383  C   TYR A 292      40.025  16.067  45.038  1.00 25.55           C
ATOM   2384  O   TYR A 292      39.471  16.162  43.918  1.00 23.13           O
ATOM   2385  N   ALA A 293      39.531  15.375  46.062  1.00 25.36           N
ATOM   2386  CA  ALA A 293      38.270  14.663  45.969  1.00 25.53           C
ATOM   2387  CB  ALA A 293      37.930  14.023  47.306  1.00 25.52           C
ATOM   2388  C   ALA A 293      37.132  15.581  45.487  1.00 25.85           C
ATOM   2389  O   ALA A 293      36.288  15.150  44.699  1.00 25.39           O
ATOM   2390  N   GLN A 294      37.102  16.838  45.970  1.00 25.86           N
ATOM   2391  CA  GLN A 294      36.094  17.812  45.538  1.00 26.63           C
ATOM   2392  CB  GLN A 294      36.328  19.140  46.257  1.00 27.07           C
ATOM   2393  CG  GLN A 294      35.071  19.901  46.556  1.00 29.36           C
ATOM   2394  CD  GLN A 294      35.331  21.246  47.223  1.00 29.47           C
ATOM   2395  OE1 GLN A 294      36.425  21.805  47.115  1.00 30.96           O
ATOM   2396  NE2 GLN A 294      34.331  21.755  47.921  1.00 31.03           N
ATOM   2397  C   GLN A 294      36.077  18.030  44.010  1.00 25.59           C
ATOM   2398  O   GLN A 294      34.999  18.135  43.398  1.00 26.31           O
ATOM   2399  N   ASP A 295      37.260  18.088  43.396  1.00 23.94           N
ATOM   2400  CA  ASP A 295      37.388  18.315  41.949  1.00 23.80           C
ATOM   2401  CB  ASP A 295      38.826  18.652  41.550  1.00 22.81           C
ATOM   2402  CG  ASP A 295      39.317  19.928  42.183  1.00 22.55           C
ATOM   2403  OD1 ASP A 295      40.533  20.213  42.081  1.00 22.65           O
ATOM   2404  OD2 ASP A 295      38.558  20.700  42.818  1.00 21.98           O
ATOM   2405  C   ASP A 295      36.934  17.104  41.157  1.00 24.50           C
ATOM   2406  O   ASP A 295      36.376  17.221  40.064  1.00 23.21           O
ATOM   2407  N   ARG A 296      37.190  15.928  41.734  1.00 24.91           N
ATOM   2408  CA  ARG A 296      36.744  14.668  41.169  1.00 25.58           C
ATOM   2409  CB  ARG A 296      37.354  13.523  42.011  1.00 25.02           C
ATOM   2410  CG  ARG A 296      37.714  12.316  41.210  1.00 29.09           C
ATOM   2411  CD  ARG A 296      38.959  11.569  41.711  1.00 32.53           C
ATOM   2412  NE  ARG A 296      38.846  11.200  43.114  1.00 31.09           N
ATOM   2413  CZ  ARG A 296      39.750  11.436  44.071  1.00 32.95           C
ATOM   2414  NH1 ARG A 296      40.907  12.045  43.827  1.00 33.06           N
ATOM   2415  NH2 ARG A 296      39.479  11.032  45.301  1.00 29.98           N
ATOM   2416  C   ARG A 296      35.214  14.571  41.135  1.00 24.69           C
ATOM   2417  O   ARG A 296      34.640  13.833  40.311  1.00 26.87           O
ATOM   2418  N   SER A 297      34.549  15.332  42.000  1.00 24.46           N
ATOM   2419  CA  SER A 297      33.101  15.336  42.079  1.00 24.96           C
ATOM   2420  CB  SER A 297      32.586  15.692  43.496  1.00 26.27           C
ATOM   2421  OG  SER A 297      32.284  17.085  43.674  1.00 31.23           O
ATOM   2422  C   SER A 297      32.435  16.240  41.027  1.00 23.42           C
ATOM   2423  O   SER A 297      31.221  16.150  40.813  1.00 23.19           O
ATOM   2424  N   HIS A 298      33.216  17.099  40.383  1.00 20.97           N
ATOM   2425  CA  HIS A 298      32.628  18.010  39.395  1.00 19.82           C
ATOM   2426  CB  HIS A 298      33.649  19.064  38.923  1.00 19.69           C
ATOM   2427  CG  HIS A 298      34.148  19.978  40.011  1.00 19.74           C
ATOM   2428  ND1 HIS A 298      33.373  20.376  41.085  1.00 23.43           N
ATOM   2429  CE1 HIS A 298      34.064  21.204  41.846  1.00 16.86           C
ATOM   2430  NE2 HIS A 298      35.256  21.366  41.298  1.00 21.83           N
ATOM   2431  CD2 HIS A 298      35.324  20.627  40.139  1.00 17.50           C
ATOM   2432  C   HIS A 298      32.056  17.190  38.213  1.00 19.48           C
ATOM   2433  O   HIS A 298      32.768  16.433  37.530  1.00 19.59           O
ATOM   2434  N   ARG A 299      30.760  17.341  37.991  1.00 19.40           N
ATOM   2435  CA  ARG A 299      30.020  16.531  37.004  1.00 19.42           C
ATOM   2436  CB  ARG A 299      28.530  16.578  37.335  1.00 20.27           C
ATOM   2437  CG  ARG A 299      28.186  15.841  38.603  1.00 22.08           C
ATOM   2438  CD  ARG A 299      26.734  15.993  39.019  1.00 29.63           C
ATOM   2439  NE  ARG A 299      26.506  15.302  40.305  1.00 35.02           N
ATOM   2440  CZ  ARG A 299      26.854  15.780  41.508  1.00 38.71           C
ATOM   2441  NH1 ARG A 299      27.444  16.962  41.643  1.00 40.59           N
ATOM   2442  NH2 ARG A 299      26.613  15.063  42.599  1.00 41.03           N
ATOM   2443  C   ARG A 299      30.198  16.961  35.540  1.00 19.74           C
ATOM   2444  O   ARG A 299      30.098  16.123  34.625  1.00 19.60           O
ATOM   2445  N   MET A 300      30.402  18.264  35.327  1.00 18.75           N
ATOM   2446  CA  MET A 300      30.531  18.826  33.962  1.00 19.04           C
ATOM   2447  CB  MET A 300      29.187  19.384  33.465  1.00 18.92           C
ATOM   2448  CG  MET A 300      28.072  18.336  33.316  1.00 21.27           C
ATOM   2449  SD  MET A 300      26.552  19.052  32.652  1.00 24.11           S
ATOM   2450  CE  MET A 300      26.951  19.096  30.887  1.00 23.88           C
ATOM   2451  C   MET A 300      31.544  19.963  34.003  1.00 17.30           C
ATOM   2452  O   MET A 300      31.131  21.148  33.911  1.00 16.80           O
ATOM   2453  N   PRO A 301      32.825  19.636  34.255  1.00 17.42           N
ATOM   2454  CA  PRO A 301      33.816  20.659  34.640  1.00 16.76           C
ATOM   2455  CB  PRO A 301      35.069  19.834  35.017  1.00 16.51           C
ATOM   2456  CG  PRO A 301      34.607  18.417  35.140  1.00 16.85           C
ATOM   2457  CD  PRO A 301      33.431  18.280  34.206  1.00 16.71           C
ATOM   2458  C   PRO A 301      34.158  21.567  33.436  1.00 15.77           C
ATOM   2459  O   PRO A 301      34.384  21.089  32.314  1.00 16.02           O
ATOM   2460  N   VAL A 302      34.145  22.873  33.680  1.00 15.53           N
ATOM   2461  CA  VAL A 302      34.505  23.857  32.677  1.00 15.42           C
ATOM   2462  CB  VAL A 302      33.254  24.694  32.221  1.00 14.71           C
ATOM   2463  CG1 VAL A 302      33.622  25.748  31.144  1.00 17.65           C
ATOM   2464  CG2 VAL A 302      32.110  23.762  31.702  1.00 17.43           C
ATOM   2465  C   VAL A 302      35.526  24.732  33.400  1.00 15.01           C
ATOM   2466  O   VAL A 302      35.201  25.432  34.358  1.00 16.10           O
ATOM   2467  N   ILE A 303      36.759  24.692  32.916  1.00 14.64           N
ATOM   2468  CA  ILE A 303      37.887  25.153  33.678  1.00 14.71           C
ATOM   2469  CB  ILE A 303      39.018  24.081  33.576  1.00 16.23           C
ATOM   2470  CG1 ILE A 303      38.485  22.684  33.948  1.00 16.20           C
ATOM   2471  CD1 ILE A 303      37.761  22.578  35.314  1.00 18.80           C
ATOM   2472  CG2 ILE A 303      40.295  24.522  34.358  1.00 13.77           C
ATOM   2473  C   ILE A 303      38.379  26.525  33.192  1.00 15.36           C
ATOM   2474  O   ILE A 303      38.611  26.743  31.968  1.00 16.46           O
ATOM   2475  N   THR A 304      38.556  27.455  34.125  1.00 14.95           N
ATOM   2476  CA  THR A 304      39.027  28.821  33.728  1.00 15.72           C
ATOM   2477  CB  THR A 304      38.894  29.826  34.889  1.00 16.23           C
ATOM   2478  OG1 THR A 304      39.592  29.345  36.058  1.00 16.85           O
ATOM   2479  CG2 THR A 304      37.441  29.952  35.340  1.00 16.68           C
ATOM   2480  C   THR A 304      40.456  28.776  33.247  1.00 16.98           C
ATOM   2481  O   THR A 304      41.233  27.947  33.760  1.00 18.04           O
ATOM   2482  N   PRO A 305      40.800  29.578  32.234  1.00 17.69           N
ATOM   2483  CA  PRO A 305      42.166  29.617  31.712  1.00 18.56           C
ATOM   2484  CB  PRO A 305      42.006  30.299  30.338  1.00 18.80           C
ATOM   2485  CG  PRO A 305      40.756  31.212  30.530  1.00 18.37           C
ATOM   2486  CD  PRO A 305      39.856  30.382  31.419  1.00 17.54           C
ATOM   2487  C   PRO A 305      43.172  30.360  32.605  1.00 19.44           C
ATOM   2488  O   PRO A 305      44.346  30.023  32.577  1.00 20.94           O
ATOM   2489  N   ALA A 306      42.715  31.346  33.389  1.00 19.24           N
ATOM   2490  CA  ALA A 306      43.632  32.197  34.131  1.00 19.36           C
ATOM   2491  CB  ALA A 306      42.923  33.463  34.603  1.00 18.13           C
ATOM   2492  C   ALA A 306      44.223  31.467  35.325  1.00 19.58           C
ATOM   2493  O   ALA A 306      43.497  30.921  36.158  1.00 18.72           O
ATOM   2494  N   TYR A 307      45.537  31.536  35.441  1.00 20.31           N
ATOM   2495  CA  TYR A 307      46.239  30.962  36.601  1.00 22.02           C
ATOM   2496  CB  TYR A 307      47.721  31.140  36.378  1.00 23.67           C
ATOM   2497  CG  TYR A 307      48.584  30.791  37.556  1.00 25.86           C
ATOM   2498  CD1 TYR A 307      48.981  29.468  37.768  1.00 25.28           C
ATOM   2499  CE1 TYR A 307      49.780  29.132  38.850  1.00 30.25           C
ATOM   2500  CZ  TYR A 307      50.217  30.128  39.713  1.00 29.74           C
ATOM   2501  OH  TYR A 307      51.021  29.759  40.776  1.00 32.29           O
ATOM   2502  CE2 TYR A 307      49.837  31.454  39.542  1.00 29.19           C
ATOM   2503  CD2 TYR A 307      49.019  31.786  38.448  1.00 26.16           C
ATOM   2504  C   TYR A 307      45.805  31.647  37.905  1.00 21.20           C
ATOM   2505  O   TYR A 307      45.806  32.869  37.968  1.00 21.74           O
ATOM   2506  N   PRO A 308      45.443  30.899  38.952  1.00 21.83           N
ATOM   2507  CA  PRO A 308      45.282  29.417  38.922  1.00 21.08           C
ATOM   2508  CB  PRO A 308      45.480  29.004  40.386  1.00 22.22           C
ATOM   2509  CG  PRO A 308      45.395  30.305  41.200  1.00 23.07           C
ATOM   2510  CD  PRO A 308      45.207  31.466  40.293  1.00 21.84           C
ATOM   2511  C   PRO A 308      43.903  28.954  38.435  1.00 20.24           C
ATOM   2512  O   PRO A 308      42.858  29.456  38.895  1.00 19.19           O
ATOM   2513  N   SER A 309      43.913  27.974  37.542  1.00 19.14           N
ATOM   2514  CA  SER A 309      42.666  27.471  36.912  1.00 19.88           C
ATOM   2515  CB  SER A 309      42.970  26.391  35.880  1.00 18.62           C
ATOM   2516  OG  SER A 309      43.541  26.964  34.702  1.00 20.52           O
ATOM   2517  C   SER A 309      41.747  26.901  37.983  1.00 19.62           C
ATOM   2518  O   SER A 309      42.213  26.223  38.918  1.00 20.23           O
ATOM   2519  N   MET A 310      40.455  27.218  37.866  1.00 18.98           N
ATOM   2520  CA AMET A 310      39.427  26.689  38.759  0.50 18.65           C
ATOM   2521  CA BMET A 310      39.465  26.625  38.748  0.50 18.79           C
ATOM   2522  CB AMET A 310      38.950  27.768  39.757  0.50 19.08           C
ATOM   2523  CB BMET A 310      39.092  27.600  39.887  0.50 19.49           C
ATOM   2524  CG AMET A 310      38.167  28.944  39.135  0.50 19.29           C
ATOM   2525  CG BMET A 310      38.718  29.011  39.431  0.50 21.20           C
ATOM   2526  SD AMET A 310      37.417  30.071  40.350  0.50 19.32           S
ATOM   2527  SD BMET A 310      37.024  29.116  38.846  0.50 23.38           S
ATOM   2528  CE AMET A 310      35.976  29.133  40.842  0.50 20.54           C
ATOM   2529  CE BMET A 310      36.116  28.986  40.386  0.50 22.82           C
ATOM   2530  C   MET A 310      38.251  26.162  37.936  1.00 18.20           C
ATOM   2531  O   MET A 310      38.122  26.486  36.750  1.00 17.47           O
ATOM   2532  N   CYS A 311      37.384  25.377  38.555  1.00 17.17           N
ATOM   2533  CA  CYS A 311      36.163  24.946  37.872  1.00 16.55           C
ATOM   2534  CB  CYS A 311      35.716  23.574  38.389  1.00 16.41           C
ATOM   2535  SG  CYS A 311      34.290  22.987  37.451  1.00 18.03           S
ATOM   2536  C   CYS A 311      35.030  25.964  38.010  1.00 16.88           C
ATOM   2537  O   CYS A 311      34.598  26.291  39.131  1.00 17.05           O
ATOM   2538  N   ALA A 312      34.508  26.415  36.870  1.00 16.05           N
ATOM   2539  CA  ALA A 312      33.384  27.385  36.845  1.00 17.41           C
ATOM   2540  CB  ALA A 312      33.479  28.228  35.571  1.00 16.12           C
ATOM   2541  C   ALA A 312      31.977  26.748  36.992  1.00 16.42           C
ATOM   2542  O   ALA A 312      30.951  27.458  36.909  1.00 17.90           O
ATOM   2543  N   THR A 313      31.908  25.417  37.206  1.00 16.00           N
ATOM   2544  CA  THR A 313      30.610  24.723  37.300  1.00 15.73           C
ATOM   2545  CB  THR A 313      30.296  23.915  36.018  1.00 16.68           C
ATOM   2546  OG1 THR A 313      31.390  23.056  35.740  1.00 17.25           O
ATOM   2547  CG2 THR A 313      30.188  24.852  34.763  1.00 13.91           C
ATOM   2548  C   THR A 313      30.508  23.785  38.502  1.00 15.81           C
ATOM   2549  O   THR A 313      29.826  22.741  38.453  1.00 15.42           O
ATOM   2550  N   HIS A 314      31.202  24.147  39.568  1.00 16.30           N
ATOM   2551  CA  HIS A 314      31.114  23.391  40.830  1.00 17.48           C
ATOM   2552  CB  HIS A 314      31.877  24.189  41.898  1.00 17.15           C
ATOM   2553  CG  HIS A 314      31.784  23.614  43.270  1.00 20.14           C
ATOM   2554  ND1 HIS A 314      32.714  22.725  43.776  1.00 20.22           N
ATOM   2555  CE1 HIS A 314      32.377  22.409  45.012  1.00 21.90           C
ATOM   2556  NE2 HIS A 314      31.284  23.075  45.334  1.00 21.40           N
ATOM   2557  CD2 HIS A 314      30.888  23.834  44.260  1.00 18.95           C
ATOM   2558  C   HIS A 314      29.679  23.076  41.287  1.00 16.55           C
ATOM   2559  O   HIS A 314      29.425  21.987  41.829  1.00 16.50           O
ATOM   2560  N   ASN A 315      28.741  23.992  41.034  1.00 16.48           N
ATOM   2561  CA  ASN A 315      27.347  23.882  41.526  1.00 16.59           C
ATOM   2562  CB  ASN A 315      26.643  25.261  41.593  1.00 16.03           C
ATOM   2563  CG  ASN A 315      27.305  26.242  42.588  1.00 17.86           C
ATOM   2564  OD1 ASN A 315      26.995  27.462  42.584  1.00 22.09           O
ATOM   2565  ND2 ASN A 315      28.219  25.749  43.407  1.00 12.80           N
ATOM   2566  C   ASN A 315      26.465  22.886  40.747  1.00 17.28           C
ATOM   2567  O   ASN A 315      25.350  22.579  41.174  1.00 17.07           O
ATOM   2568  N   ILE A 316      26.942  22.388  39.595  1.00 16.70           N
ATOM   2569  CA  ILE A 316      26.125  21.488  38.798  1.00 15.80           C
ATOM   2570  CB  ILE A 316      26.760  21.203  37.418  1.00 15.52           C
ATOM   2571  CG1 ILE A 316      26.673  22.464  36.521  1.00 15.20           C
ATOM   2572  CD1 ILE A 316      27.274  22.278  35.113  1.00 16.04           C
ATOM   2573  CG2 ILE A 316      26.019  19.988  36.710  1.00 15.41           C
ATOM   2574  C   ILE A 316      25.864  20.179  39.591  1.00 16.34           C
ATOM   2575  O   ILE A 316      26.802  19.606  40.191  1.00 17.21           O
ATOM   2576  N   THR A 317      24.588  19.789  39.635  1.00 18.42           N
ATOM   2577  CA  THR A 317      24.121  18.578  40.350  1.00 18.38           C
ATOM   2578  CB  THR A 317      22.886  18.852  41.274  1.00 18.29           C
ATOM   2579  OG1 THR A 317      21.672  18.951  40.503  1.00 19.41           O
ATOM   2580  CG2 THR A 317      23.018  20.175  42.046  1.00 18.71           C
ATOM   2581  C   THR A 317      23.762  17.481  39.358  1.00 19.66           C
ATOM   2582  O   THR A 317      23.780  17.711  38.138  1.00 19.28           O
ATOM   2583  N   GLU A 318      23.427  16.292  39.871  1.00 20.33           N
ATOM   2584  CA AGLU A 318      22.974  15.241  38.965  0.50 20.61           C
ATOM   2585  CA BGLU A 318      22.907  15.193  39.038  0.50 21.41           C
ATOM   2586  CB AGLU A 318      22.781  13.874  39.651  0.50 20.81           C
ATOM   2587  CB BGLU A 318      22.467  14.003  39.924  0.50 20.98           C
ATOM   2588  CG AGLU A 318      22.684  12.725  38.641  0.50 23.07           C
ATOM   2589  CG BGLU A 318      21.918  12.799  39.167  0.50 24.23           C
ATOM   2590  CD AGLU A 318      23.701  12.844  37.519  0.50 25.83           C
ATOM   2591  CD BGLU A 318      21.139  11.822  40.046  0.50 24.63           C
ATOM   2592  OE1AGLU A 318      24.908  12.858  37.843  0.50 25.67           O
ATOM   2593  OE1BGLU A 318      20.227  11.170  39.500  0.50 30.08           O
ATOM   2594  OE2AGLU A 318      23.299  12.953  36.323  0.50 26.71           O
ATOM   2595  OE2BGLU A 318      21.417  11.694  41.270  0.50 27.58           O
ATOM   2596  C   GLU A 318      21.732  15.671  38.187  1.00 19.90           C
ATOM   2597  O   GLU A 318      21.704  15.491  36.970  1.00 19.14           O
ATOM   2598  N   SER A 319      20.755  16.292  38.855  1.00 18.74           N
ATOM   2599  CA  SER A 319      19.534  16.710  38.204  1.00 19.44           C
ATOM   2600  CB  SER A 319      18.464  17.153  39.232  1.00 19.77           C
ATOM   2601  OG  SER A 319      18.085  16.064  40.094  1.00 19.72           O
ATOM   2602  C   SER A 319      19.792  17.810  37.179  1.00 19.21           C
ATOM   2603  O   SER A 319      19.262  17.764  36.073  1.00 19.78           O
ATOM   2604  N   THR A 320      20.593  18.814  37.539  1.00 18.99           N
ATOM   2605  CA  THR A 320      20.763  19.910  36.612  1.00 18.56           C
ATOM   2606  CB  THR A 320      21.283  21.202  37.226  1.00 18.54           C
ATOM   2607  OG1 THR A 320      22.613  20.982  37.721  1.00 16.35           O
ATOM   2608  CG2 THR A 320      20.391  21.646  38.427  1.00 19.23           C
ATOM   2609  C   THR A 320      21.610  19.456  35.432  1.00 18.44           C
ATOM   2610  O   THR A 320      21.348  19.892  34.342  1.00 19.42           O
ATOM   2611  N   LYS A 321      22.553  18.544  35.649  1.00 18.31           N
ATOM   2612  CA  LYS A 321      23.249  17.869  34.531  1.00 19.55           C
ATOM   2613  CB  LYS A 321      24.285  16.837  35.027  1.00 19.14           C
ATOM   2614  CG  LYS A 321      24.932  15.970  33.847  1.00 19.32           C
ATOM   2615  CD  LYS A 321      26.021  15.030  34.344  1.00 20.17           C
ATOM   2616  CE  LYS A 321      26.433  14.040  33.181  1.00 23.33           C
ATOM   2617  NZ  LYS A 321      27.235  12.887  33.716  1.00 27.24           N
ATOM   2618  C   LYS A 321      22.264  17.237  33.540  1.00 18.74           C
ATOM   2619  O   LYS A 321      22.373  17.436  32.321  1.00 18.22           O
ATOM   2620  N   LYS A 322      21.289  16.483  34.052  1.00 18.52           N
ATOM   2621  CA  LYS A 322      20.331  15.821  33.181  1.00 19.14           C
ATOM   2622  CB  LYS A 322      19.411  14.885  33.977  1.00 19.15           C
ATOM   2623  CG  LYS A 322      20.179  13.662  34.514  1.00 23.46           C
ATOM   2624  CD  LYS A 322      19.232  12.596  34.986  1.00 29.55           C
ATOM   2625  CE  LYS A 322      18.806  12.862  36.394  1.00 32.60           C
ATOM   2626  NZ  LYS A 322      17.977  11.733  36.901  1.00 33.73           N
ATOM   2627  C   LYS A 322      19.547  16.813  32.349  1.00 18.42           C
ATOM   2628  O   LYS A 322      19.380  16.607  31.147  1.00 18.49           O
ATOM   2629  N   VAL A 323      19.125  17.909  32.979  1.00 17.88           N
ATOM   2630  CA  VAL A 323      18.379  18.976  32.316  1.00 18.02           C
ATOM   2631  CB  VAL A 323      17.828  20.028  33.340  1.00 17.62           C
ATOM   2632  CG1 VAL A 323      17.221  21.206  32.609  1.00 17.71           C
ATOM   2633  CG2 VAL A 323      16.754  19.392  34.257  1.00 19.81           C
ATOM   2634  C   VAL A 323      19.233  19.666  31.234  1.00 16.19           C
ATOM   2635  O   VAL A 323      18.753  19.867  30.115  1.00 15.84           O
ATOM   2636  N   ILE A 324      20.472  20.006  31.563  1.00 15.70           N
ATOM   2637  CA  ILE A 324      21.378  20.649  30.581  1.00 16.66           C
ATOM   2638  CB  ILE A 324      22.761  20.965  31.226  1.00 16.22           C
ATOM   2639  CG1 ILE A 324      22.615  21.987  32.385  1.00 15.47           C
ATOM   2640  CD1 ILE A 324      23.818  22.000  33.318  1.00 17.90           C
ATOM   2641  CG2 ILE A 324      23.779  21.404  30.164  1.00 15.54           C
ATOM   2642  C   ILE A 324      21.545  19.717  29.365  1.00 16.98           C
ATOM   2643  O   ILE A 324      21.427  20.147  28.213  1.00 16.87           O
ATOM   2644  N   LEU A 325      21.755  18.430  29.615  1.00 19.09           N
ATOM   2645  CA ALEU A 325      21.935  17.477  28.502  0.50 19.68           C
ATOM   2646  CA BLEU A 325      21.905  17.437  28.526  0.50 19.93           C
ATOM   2647  CB ALEU A 325      22.528  16.147  28.990  0.50 19.84           C
ATOM   2648  CB BLEU A 325      22.302  16.077  29.095  0.50 20.18           C
ATOM   2649  CG ALEU A 325      23.978  16.211  29.519  0.50 20.18           C
ATOM   2650  CG BLEU A 325      23.811  15.820  29.138  0.50 21.58           C
ATOM   2651  CD1ALEU A 325      24.369  14.922  30.248  0.50 19.56           C
ATOM   2652  CD1BLEU A 325      24.552  16.850  29.973  0.50 19.90           C
ATOM   2653  CD2ALEU A 325      24.989  16.484  28.405  0.50 19.05           C
ATOM   2654  CD2BLEU A 325      24.100  14.417  29.666  0.50 20.06           C
ATOM   2655  C   LEU A 325      20.676  17.317  27.618  1.00 20.89           C
ATOM   2656  O   LEU A 325      20.805  17.296  26.395  1.00 20.00           O
ATOM   2657  N   GLU A 326      19.484  17.259  28.235  1.00 20.50           N
ATOM   2658  CA  GLU A 326      18.174  17.264  27.559  1.00 22.56           C
ATOM   2659  CB  GLU A 326      17.014  17.427  28.558  1.00 23.32           C
ATOM   2660  CG  GLU A 326      16.607  16.280  29.466  1.00 26.00           C
ATOM   2661  CD  GLU A 326      15.509  16.714  30.482  1.00 27.95           C
ATOM   2662  OE1 GLU A 326      14.829  17.731  30.208  1.00 33.18           O
ATOM   2663  OE2 GLU A 326      15.300  16.045  31.567  1.00 34.70           O
ATOM   2664  C   GLU A 326      18.081  18.460  26.613  1.00 20.82           C
ATOM   2665  O   GLU A 326      17.621  18.333  25.469  1.00 19.58           O
ATOM   2666  N   GLU A 327      18.494  19.626  27.116  1.00 19.19           N
ATOM   2667  CA  GLU A 327      18.480  20.868  26.356  1.00 18.98           C
ATOM   2668  CB  GLU A 327      18.643  22.103  27.299  1.00 19.04           C
ATOM   2669  CG  GLU A 327      17.401  22.311  28.176  1.00 21.87           C
ATOM   2670  CD  GLU A 327      16.133  22.555  27.341  1.00 22.60           C
ATOM   2671  OE1 GLU A 327      15.041  22.119  27.765  1.00 23.32           O
ATOM   2672  OE2 GLU A 327      16.208  23.188  26.267  1.00 20.96           O
ATOM   2673  C   GLU A 327      19.491  20.883  25.219  1.00 18.47           C
ATOM   2674  O   GLU A 327      19.194  21.402  24.146  1.00 18.83           O
ATOM   2675  N   PHE A 328      20.667  20.317  25.439  1.00 17.23           N
ATOM   2676  CA  PHE A 328      21.614  20.157  24.326  1.00 17.64           C
ATOM   2677  CB  PHE A 328      22.916  19.515  24.785  1.00 17.59           C
ATOM   2678  CG  PHE A 328      23.801  20.391  25.650  1.00 17.59           C
ATOM   2679  CD1 PHE A 328      24.809  19.799  26.384  1.00 17.05           C
ATOM   2680  CE1 PHE A 328      25.667  20.552  27.207  1.00 19.75           C
ATOM   2681  CZ  PHE A 328      25.492  21.941  27.287  1.00 18.90           C
ATOM   2682  CE2 PHE A 328      24.468  22.557  26.557  1.00 18.47           C
ATOM   2683  CD2 PHE A 328      23.627  21.791  25.730  1.00 17.32           C
ATOM   2684  C   PHE A 328      21.009  19.288  23.197  1.00 17.85           C
ATOM   2685  O   PHE A 328      21.122  19.625  22.021  1.00 17.25           O
ATOM   2686  N   VAL A 329      20.425  18.151  23.581  1.00 17.87           N
ATOM   2687  CA  VAL A 329      19.769  17.246  22.605  1.00 19.28           C
ATOM   2688  CB  VAL A 329      19.223  15.986  23.295  1.00 18.62           C
ATOM   2689  CG1 VAL A 329      18.353  15.140  22.321  1.00 20.39           C
ATOM   2690  CG2 VAL A 329      20.368  15.150  23.897  1.00 19.45           C
ATOM   2691  C   VAL A 329      18.668  17.967  21.779  1.00 19.33           C
ATOM   2692  O   VAL A 329      18.608  17.842  20.549  1.00 18.40           O
ATOM   2693  N   ARG A 330      17.826  18.729  22.464  1.00 18.88           N
ATOM   2694  CA  ARG A 330      16.866  19.619  21.813  1.00 19.59           C
ATOM   2695  CB  ARG A 330      16.079  20.405  22.876  1.00 19.10           C
ATOM   2696  CG  ARG A 330      15.056  21.413  22.305  1.00 20.56           C
ATOM   2697  CD  ARG A 330      14.217  22.135  23.397  1.00 21.05           C
ATOM   2698  NE  ARG A 330      13.369  23.205  22.828  1.00 21.83           N
ATOM   2699  CZ  ARG A 330      13.789  24.411  22.430  1.00 22.54           C
ATOM   2700  NH1 ARG A 330      15.090  24.757  22.457  1.00 22.39           N
ATOM   2701  NH2 ARG A 330      12.903  25.262  21.932  1.00 24.55           N
ATOM   2702  C   ARG A 330      17.534  20.600  20.855  1.00 18.10           C
ATOM   2703  O   ARG A 330      17.032  20.844  19.761  1.00 19.03           O
ATOM   2704  N   GLY A 331      18.656  21.171  21.289  1.00 18.76           N
ATOM   2705  CA  GLY A 331      19.413  22.123  20.475  1.00 17.62           C
ATOM   2706  C   GLY A 331      19.887  21.483  19.170  1.00 18.92           C
ATOM   2707  O   GLY A 331      19.797  22.104  18.098  1.00 18.67           O
ATOM   2708  N   VAL A 332      20.406  20.257  19.278  1.00 19.01           N
ATOM   2709  CA  VAL A 332      20.825  19.483  18.106  1.00 18.86           C
ATOM   2710  CB  VAL A 332      21.359  18.064  18.459  1.00 19.14           C
ATOM   2711  CG1 VAL A 332      21.766  17.307  17.167  1.00 18.71           C
ATOM   2712  CG2 VAL A 332      22.522  18.144  19.419  1.00 17.22           C
ATOM   2713  C   VAL A 332      19.641  19.322  17.151  1.00 20.05           C
ATOM   2714  O   VAL A 332      19.775  19.619  15.979  1.00 20.67           O
ATOM   2715  N   GLN A 333      18.484  18.917  17.668  1.00 21.36           N
ATOM   2716  CA  GLN A 333      17.345  18.654  16.783  1.00 22.24           C
ATOM   2717  CB  GLN A 333      16.201  18.009  17.565  1.00 23.51           C
ATOM   2718  CG  GLN A 333      16.545  16.629  18.072  1.00 30.00           C
ATOM   2719  CD  GLN A 333      15.634  16.166  19.215  1.00 36.28           C
ATOM   2720  OE1 GLN A 333      14.876  16.952  19.790  1.00 39.39           O
ATOM   2721  NE2 GLN A 333      15.728  14.885  19.550  1.00 40.47           N
ATOM   2722  C   GLN A 333      16.872  19.939  16.118  1.00 21.02           C
ATOM   2723  O   GLN A 333      16.647  19.975  14.910  1.00 20.41           O
ATOM   2724  N   ILE A 334      16.771  21.014  16.887  1.00 20.25           N
ATOM   2725  CA  ILE A 334      16.270  22.258  16.316  1.00 20.27           C
ATOM   2726  CB  ILE A 334      15.765  23.206  17.419  1.00 20.37           C
ATOM   2727  CG1 ILE A 334      14.544  22.564  18.101  1.00 21.76           C
ATOM   2728  CD1 ILE A 334      14.034  23.292  19.308  1.00 21.63           C
ATOM   2729  CG2 ILE A 334      15.470  24.612  16.804  1.00 21.68           C
ATOM   2730  C   ILE A 334      17.254  22.933  15.359  1.00 20.27           C
ATOM   2731  O   ILE A 334      16.867  23.381  14.269  1.00 20.34           O
ATOM   2732  N   THR A 335      18.525  23.035  15.751  1.00 19.07           N
ATOM   2733  CA  THR A 335      19.493  23.608  14.812  1.00 19.09           C
ATOM   2734  CB  THR A 335      20.884  23.861  15.412  1.00 17.11           C
ATOM   2735  OG1 THR A 335      21.428  22.645  15.972  1.00 17.45           O
ATOM   2736  CG2 THR A 335      20.835  24.906  16.543  1.00 17.05           C
ATOM   2737  C   THR A 335      19.608  22.770  13.520  1.00 20.34           C
ATOM   2738  O   THR A 335      19.727  23.343  12.458  1.00 20.48           O
ATOM   2739  N   ASN A 336      19.588  21.437  13.613  1.00 21.31           N
ATOM   2740  CA  ASN A 336      19.593  20.636  12.370  1.00 21.91           C
ATOM   2741  CB  ASN A 336      19.606  19.120  12.673  1.00 22.91           C
ATOM   2742  CG  ASN A 336      20.991  18.572  13.062  1.00 22.39           C
ATOM   2743  OD1 ASN A 336      21.091  17.495  13.705  1.00 25.18           O
ATOM   2744  ND2 ASN A 336      22.050  19.243  12.638  1.00 21.47           N
ATOM   2745  C   ASN A 336      18.380  21.035  11.488  1.00 22.86           C
ATOM   2746  O   ASN A 336      18.512  21.253  10.279  1.00 23.30           O
ATOM   2747  N   ASP A 337      17.217  21.197  12.118  1.00 23.04           N
ATOM   2748  CA  ASP A 337      15.980  21.590  11.427  1.00 23.70           C
ATOM   2749  CB  ASP A 337      14.773  21.476  12.360  1.00 23.89           C
ATOM   2750  CG  ASP A 337      14.279  20.055  12.508  1.00 26.85           C
ATOM   2751  OD1 ASP A 337      13.408  19.840  13.353  1.00 29.17           O
ATOM   2752  OD2 ASP A 337      14.696  19.087  11.824  1.00 31.94           O
ATOM   2753  C   ASP A 337      16.062  22.975  10.827  1.00 23.03           C
ATOM   2754  O   ASP A 337      15.553  23.213   9.728  1.00 24.31           O
ATOM   2755  N   ILE A 338      16.716  23.896  11.523  1.00 21.65           N
ATOM   2756  CA  ILE A 338      16.953  25.215  10.973  1.00 20.88           C
ATOM   2757  CB  ILE A 338      17.580  26.162  12.042  1.00 20.01           C
ATOM   2758  CG1 ILE A 338      16.573  26.491  13.145  1.00 20.87           C
ATOM   2759  CD1 ILE A 338      17.202  27.221  14.372  1.00 20.41           C
ATOM   2760  CG2 ILE A 338      18.042  27.447  11.390  1.00 20.87           C
ATOM   2761  C   ILE A 338      17.842  25.133   9.713  1.00 20.95           C
ATOM   2762  O   ILE A 338      17.514  25.741   8.716  1.00 22.33           O
ATOM   2763  N   PHE A 339      18.942  24.378   9.778  1.00 21.92           N
ATOM   2764  CA  PHE A 339      19.851  24.193   8.641  1.00 22.99           C
ATOM   2765  CB  PHE A 339      21.209  23.640   9.085  1.00 24.36           C
ATOM   2766  CG  PHE A 339      22.112  24.702   9.680  1.00 24.15           C
ATOM   2767  CD1 PHE A 339      22.198  24.858  11.061  1.00 24.79           C
ATOM   2768  CE1 PHE A 339      22.994  25.857  11.639  1.00 23.49           C
ATOM   2769  CZ  PHE A 339      23.731  26.732  10.816  1.00 22.68           C
ATOM   2770  CE2 PHE A 339      23.646  26.608   9.415  1.00 25.23           C
ATOM   2771  CD2 PHE A 339      22.820  25.590   8.851  1.00 26.16           C
ATOM   2772  C   PHE A 339      19.251  23.372   7.485  1.00 25.34           C
ATOM   2773  O   PHE A 339      19.789  23.368   6.367  1.00 26.63           O
ATOM   2774  N   SER A 340      18.161  22.679   7.766  1.00 25.44           N
ATOM   2775  CA  SER A 340      17.457  21.943   6.721  1.00 28.38           C
ATOM   2776  CB  SER A 340      17.256  20.479   7.117  1.00 27.52           C
ATOM   2777  OG  SER A 340      16.180  20.344   8.015  1.00 32.88           O
ATOM   2778  C   SER A 340      16.158  22.689   6.349  1.00 28.46           C
ATOM   2779  O   SER A 340      15.254  22.121   5.716  1.00 29.25           O
ATOM   2780  N   ASN A 341      16.106  23.975   6.713  1.00 27.88           N
ATOM   2781  CA  ASN A 341      15.018  24.885   6.323  1.00 29.40           C
ATOM   2782  CB  ASN A 341      14.998  25.068   4.790  1.00 28.46           C
ATOM   2783  CG  ASN A 341      16.378  25.200   4.207  1.00 30.80           C
ATOM   2784  OD1 ASN A 341      16.850  24.317   3.452  1.00 32.31           O
ATOM   2785  ND2 ASN A 341      17.068  26.280   4.576  1.00 28.65           N
ATOM   2786  C   ASN A 341      13.627  24.487   6.823  1.00 29.99           C
ATOM   2787  O   ASN A 341      12.618  24.857   6.193  1.00 30.96           O
ATOM   2788  N   LYS A 342      13.572  23.760   7.943  1.00 29.41           N
ATOM   2789  CA  LYS A 342      12.320  23.304   8.566  1.00 29.63           C
ATOM   2790  CB  LYS A 342      12.457  21.854   9.026  1.00 29.88           C
ATOM   2791  CG  LYS A 342      12.529  20.765   7.976  1.00 32.92           C
ATOM   2792  CD  LYS A 342      12.234  19.456   8.720  1.00 37.08           C
ATOM   2793  CE  LYS A 342      12.922  18.253   8.165  1.00 39.22           C
ATOM   2794  NZ  LYS A 342      13.127  17.247   9.285  1.00 42.84           N
ATOM   2795  C   LYS A 342      11.884  24.100   9.801  1.00 29.45           C
ATOM   2796  O   LYS A 342      10.714  24.048  10.197  1.00 29.66           O
ATOM   2797  N   LYS A 343      12.826  24.768  10.468  1.00 28.29           N
ATOM   2798  CA  LYS A 343      12.515  25.544  11.668  1.00 26.97           C
ATOM   2799  CB  LYS A 343      12.916  24.780  12.935  1.00 26.66           C
ATOM   2800  CG  LYS A 343      12.036  23.560  13.272  1.00 27.98           C
ATOM   2801  CD  LYS A 343      12.274  23.129  14.708  1.00 34.38           C
ATOM   2802  CE  LYS A 343      11.493  21.896  15.080  1.00 37.84           C
ATOM   2803  NZ  LYS A 343      10.057  22.214  15.154  1.00 39.76           N
ATOM   2804  C   LYS A 343      13.219  26.893  11.615  1.00 26.55           C
ATOM   2805  O   LYS A 343      14.033  27.124  10.716  1.00 26.80           O
ATOM   2806  N   SER A 344      12.891  27.780  12.574  1.00 25.97           N
ATOM   2807  CA  SER A 344      13.400  29.153  12.594  1.00 25.30           C
ATOM   2808  CB  SER A 344      12.248  30.158  12.653  1.00 26.07           C
ATOM   2809  OG  SER A 344      11.533  29.980  13.881  1.00 27.50           O
ATOM   2810  C   SER A 344      14.270  29.353  13.841  1.00 23.95           C
ATOM   2811  O   SER A 344      14.192  28.563  14.779  1.00 24.07           O
ATOM   2812  N   TRP A 345      15.058  30.423  13.863  1.00 23.34           N
ATOM   2813  CA  TRP A 345      15.817  30.755  15.081  1.00 23.03           C
ATOM   2814  CB  TRP A 345      16.671  31.986  14.852  1.00 22.24           C
ATOM   2815  CG  TRP A 345      17.796  31.706  13.928  1.00 21.38           C
ATOM   2816  CD1 TRP A 345      17.992  32.244  12.703  1.00 20.15           C
ATOM   2817  NE1 TRP A 345      19.131  31.741  12.127  1.00 21.90           N
ATOM   2818  CE2 TRP A 345      19.695  30.830  12.980  1.00 19.49           C
ATOM   2819  CD2 TRP A 345      18.867  30.767  14.130  1.00 21.78           C
ATOM   2820  CE3 TRP A 345      19.239  29.910  15.186  1.00 22.41           C
ATOM   2821  CZ3 TRP A 345      20.385  29.121  15.040  1.00 20.75           C
ATOM   2822  CH2 TRP A 345      21.192  29.216  13.872  1.00 20.75           C
ATOM   2823  CZ2 TRP A 345      20.846  30.064  12.836  1.00 20.23           C
ATOM   2824  C   TRP A 345      14.865  30.962  16.255  1.00 23.04           C
ATOM   2825  O   TRP A 345      15.159  30.557  17.381  1.00 23.44           O
ATOM   2826  N   ALA A 346      13.712  31.582  15.986  1.00 23.60           N
ATOM   2827  CA  ALA A 346      12.663  31.720  17.012  1.00 23.53           C
ATOM   2828  CB  ALA A 346      11.411  32.418  16.456  1.00 23.55           C
ATOM   2829  C   ALA A 346      12.293  30.412  17.683  1.00 23.47           C
ATOM   2830  O   ALA A 346      12.077  30.374  18.904  1.00 24.14           O
ATOM   2831  N   ASN A 347      12.220  29.315  16.920  1.00 23.39           N
ATOM   2832  CA  ASN A 347      11.927  28.019  17.531  1.00 23.21           C
ATOM   2833  CB  ASN A 347      11.764  26.911  16.481  1.00 23.95           C
ATOM   2834  CG  ASN A 347      10.576  27.157  15.532  1.00 26.64           C
ATOM   2835  OD1 ASN A 347      10.680  26.938  14.316  1.00 27.27           O
ATOM   2836  ND2 ASN A 347       9.438  27.589  16.093  1.00 28.21           N
ATOM   2837  C   ASN A 347      12.993  27.605  18.570  1.00 23.35           C
ATOM   2838  O   ASN A 347      12.657  27.065  19.621  1.00 22.11           O
ATOM   2839  N   LEU A 348      14.259  27.893  18.270  1.00 21.76           N
ATOM   2840  CA  LEU A 348      15.351  27.538  19.196  1.00 21.00           C
ATOM   2841  CB  LEU A 348      16.706  27.802  18.562  1.00 20.48           C
ATOM   2842  CG  LEU A 348      17.959  27.482  19.400  1.00 19.28           C
ATOM   2843  CD1 LEU A 348      18.023  26.008  19.737  1.00 19.23           C
ATOM   2844  CD2 LEU A 348      19.217  27.925  18.636  1.00 21.60           C
ATOM   2845  C   LEU A 348      15.229  28.274  20.532  1.00 20.37           C
ATOM   2846  O   LEU A 348      15.456  27.684  21.594  1.00 20.15           O
ATOM   2847  N   PHE A 349      14.829  29.538  20.446  1.00 20.35           N
ATOM   2848  CA  PHE A 349      14.717  30.440  21.596  1.00 21.33           C
ATOM   2849  CB  PHE A 349      15.051  31.877  21.182  1.00 20.92           C
ATOM   2850  CG  PHE A 349      16.434  32.040  20.579  1.00 20.94           C
ATOM   2851  CD1 PHE A 349      16.596  32.741  19.374  1.00 21.71           C
ATOM   2852  CE1 PHE A 349      17.857  32.931  18.777  1.00 21.24           C
ATOM   2853  CZ  PHE A 349      18.999  32.411  19.401  1.00 21.60           C
ATOM   2854  CE2 PHE A 349      18.865  31.721  20.639  1.00 22.32           C
ATOM   2855  CD2 PHE A 349      17.563  31.541  21.223  1.00 22.49           C
ATOM   2856  C   PHE A 349      13.350  30.403  22.304  1.00 21.76           C
ATOM   2857  O   PHE A 349      13.083  31.224  23.161  1.00 22.07           O
ATOM   2858  N   GLU A 350      12.516  29.425  21.985  1.00 23.06           N
ATOM   2859  CA  GLU A 350      11.230  29.315  22.663  1.00 23.90           C
ATOM   2860  CB  GLU A 350      10.354  28.241  22.016  1.00 24.97           C
ATOM   2861  CG  GLU A 350       9.877  28.722  20.661  1.00 29.08           C
ATOM   2862  CD  GLU A 350       8.848  27.815  20.003  1.00 34.31           C
ATOM   2863  OE1 GLU A 350       8.563  26.717  20.546  1.00 35.28           O
ATOM   2864  OE2 GLU A 350       8.343  28.227  18.936  1.00 36.01           O
ATOM   2865  C   GLU A 350      11.351  29.091  24.159  1.00 23.81           C
ATOM   2866  O   GLU A 350      12.209  28.342  24.632  1.00 21.88           O
ATOM   2867  N   LYS A 351      10.464  29.756  24.902  1.00 23.83           N
ATOM   2868  CA  LYS A 351      10.465  29.705  26.360  1.00 24.88           C
ATOM   2869  CB  LYS A 351       9.379  30.659  26.899  1.00 25.52           C
ATOM   2870  CG  LYS A 351       9.393  30.848  28.359  1.00 30.73           C
ATOM   2871  CD  LYS A 351       8.002  31.343  28.804  1.00 34.81           C
ATOM   2872  CE  LYS A 351       7.771  30.981  30.232  1.00 36.93           C
ATOM   2873  NZ  LYS A 351       7.280  29.600  30.331  1.00 37.81           N
ATOM   2874  C   LYS A 351      10.253  28.297  26.911  1.00 23.89           C
ATOM   2875  O   LYS A 351       9.500  27.495  26.348  1.00 23.94           O
ATOM   2876  N   ASN A 352      10.936  28.007  28.010  1.00 22.90           N
ATOM   2877  CA  ASN A 352      10.761  26.760  28.773  1.00 24.00           C
ATOM   2878  CB  ASN A 352      11.635  26.799  30.033  1.00 24.03           C
ATOM   2879  CG  ASN A 352      11.102  27.773  31.069  1.00 24.53           C
ATOM   2880  OD1 ASN A 352      10.225  27.422  31.875  1.00 21.81           O
ATOM   2881  ND2 ASN A 352      11.609  28.998  31.049  1.00 25.53           N
ATOM   2882  C   ASN A 352       9.290  26.561  29.209  1.00 24.32           C
ATOM   2883  O   ASN A 352       8.491  27.525  29.233  1.00 24.81           O
ATOM   2884  N   ASP A 353       8.948  25.328  29.553  1.00 25.29           N
ATOM   2885  CA  ASP A 353       7.627  25.048  30.122  1.00 26.43           C
ATOM   2886  CB  ASP A 353       6.803  24.206  29.136  1.00 27.35           C
ATOM   2887  CG  ASP A 353       7.296  22.771  29.012  1.00 30.79           C
ATOM   2888  OD1 ASP A 353       8.465  22.447  29.373  1.00 30.93           O
ATOM   2889  OD2 ASP A 353       6.541  21.872  28.553  1.00 36.71           O
ATOM   2890  C   ASP A 353       7.734  24.386  31.494  1.00 25.67           C
ATOM   2891  O   ASP A 353       6.974  23.448  31.815  1.00 25.84           O
ATOM   2892  N   PHE A 354       8.678  24.886  32.305  1.00 24.00           N
ATOM   2893  CA  PHE A 354       8.936  24.363  33.628  1.00 23.37           C
ATOM   2894  CB  PHE A 354       9.866  25.319  34.413  1.00 21.87           C
ATOM   2895  CG  PHE A 354      10.240  24.800  35.783  1.00 22.21           C
ATOM   2896  CD1 PHE A 354      11.273  23.875  35.940  1.00 20.55           C
ATOM   2897  CE1 PHE A 354      11.623  23.395  37.231  1.00 21.77           C
ATOM   2898  CZ  PHE A 354      10.900  23.819  38.354  1.00 21.39           C
ATOM   2899  CE2 PHE A 354       9.853  24.742  38.201  1.00 21.15           C
ATOM   2900  CD2 PHE A 354       9.523  25.216  36.916  1.00 20.31           C
ATOM   2901  C   PHE A 354       7.670  24.115  34.468  1.00 23.33           C
ATOM   2902  O   PHE A 354       7.548  23.089  35.132  1.00 23.83           O
ATOM   2903  N   PHE A 355       6.771  25.081  34.478  1.00 24.24           N
ATOM   2904  CA  PHE A 355       5.606  25.003  35.370  1.00 25.45           C
ATOM   2905  CB  PHE A 355       5.186  26.408  35.776  1.00 25.61           C
ATOM   2906  CG  PHE A 355       6.183  27.071  36.673  1.00 25.09           C
ATOM   2907  CD1 PHE A 355       7.074  28.008  36.164  1.00 26.61           C
ATOM   2908  CE1 PHE A 355       8.028  28.603  36.994  1.00 26.17           C
ATOM   2909  CZ  PHE A 355       8.096  28.239  38.343  1.00 24.96           C
ATOM   2910  CE2 PHE A 355       7.224  27.288  38.851  1.00 24.21           C
ATOM   2911  CD2 PHE A 355       6.274  26.709  38.012  1.00 23.01           C
ATOM   2912  C   PHE A 355       4.434  24.176  34.801  1.00 26.28           C
ATOM   2913  O   PHE A 355       3.350  24.107  35.421  1.00 27.28           O
ATOM   2914  N   PHE A 356       4.686  23.542  33.657  1.00 27.59           N
ATOM   2915  CA  PHE A 356       3.744  22.613  32.993  1.00 29.14           C
ATOM   2916  CB  PHE A 356       3.482  23.080  31.554  1.00 30.22           C
ATOM   2917  CG  PHE A 356       2.709  24.361  31.486  1.00 33.45           C
ATOM   2918  CD1 PHE A 356       3.361  25.584  31.278  1.00 34.68           C
ATOM   2919  CE1 PHE A 356       2.636  26.780  31.251  1.00 36.08           C
ATOM   2920  CZ  PHE A 356       1.249  26.759  31.433  1.00 35.69           C
ATOM   2921  CE2 PHE A 356       0.586  25.534  31.637  1.00 35.43           C
ATOM   2922  CD2 PHE A 356       1.321  24.351  31.662  1.00 35.45           C
ATOM   2923  C   PHE A 356       4.218  21.161  32.980  1.00 29.65           C
ATOM   2924  O   PHE A 356       3.416  20.237  32.813  1.00 30.66           O
ATOM   2925  N   ARG A 357       5.509  20.948  33.189  1.00 28.71           N
ATOM   2926  CA  ARG A 357       6.133  19.664  32.843  1.00 28.64           C
ATOM   2927  CB  ARG A 357       7.538  19.883  32.245  1.00 28.33           C
ATOM   2928  CG  ARG A 357       8.570  20.416  33.238  1.00 27.87           C
ATOM   2929  CD  ARG A 357       9.936  20.742  32.610  1.00 27.96           C
ATOM   2930  NE  ARG A 357      10.590  19.515  32.147  1.00 26.50           N
ATOM   2931  CZ  ARG A 357      11.791  19.456  31.558  1.00 29.94           C
ATOM   2932  NH1 ARG A 357      12.507  20.554  31.371  1.00 25.43           N
ATOM   2933  NH2 ARG A 357      12.279  18.280  31.174  1.00 27.95           N
ATOM   2934  C   ARG A 357       6.207  18.659  33.994  1.00 28.51           C
ATOM   2935  O   ARG A 357       6.443  17.471  33.759  1.00 28.35           O
ATOM   2936  N   TYR A 358       6.050  19.136  35.232  1.00 28.51           N
ATOM   2937  CA  TYR A 358       6.004  18.236  36.393  1.00 28.66           C
ATOM   2938  CB  TYR A 358       7.096  18.573  37.455  1.00 27.98           C
ATOM   2939  CG  TYR A 358       8.505  18.520  36.885  1.00 28.44           C
ATOM   2940  CD1 TYR A 358       9.255  19.701  36.682  1.00 26.89           C
ATOM   2941  CE1 TYR A 358      10.564  19.653  36.094  1.00 24.24           C
ATOM   2942  CZ  TYR A 358      11.095  18.415  35.730  1.00 26.06           C
ATOM   2943  OH  TYR A 358      12.346  18.313  35.166  1.00 26.57           O
ATOM   2944  CE2 TYR A 358      10.355  17.235  35.922  1.00 27.28           C
ATOM   2945  CD2 TYR A 358       9.071  17.296  36.489  1.00 28.47           C
ATOM   2946  C   TYR A 358       4.607  18.179  37.025  1.00 28.95           C
ATOM   2947  O   TYR A 358       3.821  19.118  36.911  1.00 28.78           O
ATOM   2948  N   LYS A 359       4.322  17.047  37.659  1.00 29.96           N
ATOM   2949  CA  LYS A 359       3.100  16.868  38.448  1.00 31.64           C
ATOM   2950  CB  LYS A 359       2.859  15.373  38.683  1.00 31.65           C
ATOM   2951  CG  LYS A 359       2.420  14.587  37.444  1.00 33.84           C
ATOM   2952  CD  LYS A 359       2.331  13.093  37.808  1.00 34.44           C
ATOM   2953  CE  LYS A 359       2.025  12.201  36.614  1.00 39.76           C
ATOM   2954  NZ  LYS A 359       3.275  11.892  35.832  1.00 43.00           N
ATOM   2955  C   LYS A 359       3.162  17.563  39.797  1.00 31.23           C
ATOM   2956  O   LYS A 359       2.120  17.957  40.347  1.00 31.43           O
ATOM   2957  N   PHE A 360       4.376  17.667  40.342  1.00 30.66           N
ATOM   2958  CA  PHE A 360       4.615  18.070  41.727  1.00 30.15           C
ATOM   2959  CB  PHE A 360       5.000  16.863  42.579  1.00 31.19           C
ATOM   2960  CG  PHE A 360       4.041  15.690  42.456  1.00 32.98           C
ATOM   2961  CD1 PHE A 360       4.437  14.516  41.824  1.00 34.57           C
ATOM   2962  CE1 PHE A 360       3.558  13.438  41.712  1.00 34.66           C
ATOM   2963  CZ  PHE A 360       2.257  13.541  42.223  1.00 35.83           C
ATOM   2964  CE2 PHE A 360       1.847  14.708  42.851  1.00 35.15           C
ATOM   2965  CD2 PHE A 360       2.735  15.782  42.956  1.00 34.98           C
ATOM   2966  C   PHE A 360       5.764  19.083  41.802  1.00 29.40           C
ATOM   2967  O   PHE A 360       6.748  18.965  41.067  1.00 27.76           O
ATOM   2968  N   TYR A 361       5.639  20.050  42.715  1.00 27.97           N
ATOM   2969  CA  TYR A 361       6.669  21.075  42.912  1.00 27.57           C
ATOM   2970  CB  TYR A 361       6.274  22.395  42.233  1.00 27.23           C
ATOM   2971  CG  TYR A 361       6.156  22.283  40.733  1.00 25.69           C
ATOM   2972  CD1 TYR A 361       5.021  21.711  40.146  1.00 24.82           C
ATOM   2973  CE1 TYR A 361       4.909  21.593  38.774  1.00 25.98           C
ATOM   2974  CZ  TYR A 361       5.951  22.026  37.948  1.00 25.60           C
ATOM   2975  OH  TYR A 361       5.816  21.870  36.586  1.00 26.61           O
ATOM   2976  CE2 TYR A 361       7.094  22.589  38.495  1.00 26.55           C
ATOM   2977  CD2 TYR A 361       7.201  22.708  39.892  1.00 24.60           C
ATOM   2978  C   TYR A 361       6.879  21.296  44.399  1.00 27.47           C
ATOM   2979  O   TYR A 361       5.913  21.247  45.194  1.00 26.92           O
ATOM   2980  N   LEU A 362       8.129  21.513  44.786  1.00 26.53           N
ATOM   2981  CA  LEU A 362       8.401  21.965  46.126  1.00 26.06           C
ATOM   2982  CB  LEU A 362       9.586  21.218  46.726  1.00 25.56           C
ATOM   2983  CG  LEU A 362      10.085  21.538  48.136  1.00 26.80           C
ATOM   2984  CD1 LEU A 362       8.985  21.119  49.149  1.00 25.73           C
ATOM   2985  CD2 LEU A 362      11.383  20.826  48.422  1.00 25.43           C
ATOM   2986  C   LEU A 362       8.638  23.465  46.074  1.00 27.27           C
ATOM   2987  O   LEU A 362       9.493  23.952  45.327  1.00 26.10           O
ATOM   2988  N   GLU A 363       7.863  24.191  46.880  1.00 27.58           N
ATOM   2989  CA  GLU A 363       7.865  25.647  46.869  1.00 28.91           C
ATOM   2990  CB  GLU A 363       6.407  26.071  46.833  1.00 29.79           C
ATOM   2991  CG  GLU A 363       6.086  27.513  46.567  1.00 32.11           C
ATOM   2992  CD  GLU A 363       4.607  27.757  46.771  1.00 35.95           C
ATOM   2993  OE1 GLU A 363       4.162  27.675  47.938  1.00 38.33           O
ATOM   2994  OE2 GLU A 363       3.896  28.000  45.776  1.00 36.75           O
ATOM   2995  C   GLU A 363       8.595  26.120  48.131  1.00 28.87           C
ATOM   2996  O   GLU A 363       8.260  25.674  49.245  1.00 29.48           O
ATOM   2997  N   ILE A 364       9.620  26.962  47.961  1.00 27.89           N
ATOM   2998  CA  ILE A 364      10.480  27.414  49.069  1.00 27.79           C
ATOM   2999  CB  ILE A 364      11.984  27.090  48.821  1.00 28.17           C
ATOM   3000  CG1 ILE A 364      12.258  25.580  48.683  1.00 28.30           C
ATOM   3001  CD1 ILE A 364      12.564  25.162  47.292  1.00 30.03           C
ATOM   3002  CG2 ILE A 364      12.855  27.651  49.938  1.00 28.82           C
ATOM   3003  C   ILE A 364      10.313  28.933  49.242  1.00 27.93           C
ATOM   3004  O   ILE A 364      10.698  29.687  48.353  1.00 27.58           O
ATOM   3005  N   THR A 365       9.759  29.376  50.375  1.00 27.03           N
ATOM   3006  CA  THR A 365       9.446  30.812  50.543  1.00 26.15           C
ATOM   3007  CB  THR A 365       7.924  31.025  50.707  1.00 26.78           C
ATOM   3008  OG1 THR A 365       7.223  30.518  49.568  1.00 28.44           O
ATOM   3009  CG2 THR A 365       7.547  32.535  50.721  1.00 24.42           C
ATOM   3010  C   THR A 365      10.210  31.392  51.725  1.00 25.67           C
ATOM   3011  O   THR A 365      10.073  30.892  52.856  1.00 25.67           O
ATOM   3012  N   ALA A 366      10.986  32.444  51.461  1.00 23.17           N
ATOM   3013  CA  ALA A 366      11.655  33.224  52.485  1.00 23.56           C
ATOM   3014  CB  ALA A 366      13.048  33.613  52.033  1.00 24.02           C
ATOM   3015  C   ALA A 366      10.758  34.454  52.711  1.00 23.46           C
ATOM   3016  O   ALA A 366      10.357  35.137  51.750  1.00 21.73           O
ATOM   3017  N   TYR A 367      10.396  34.684  53.971  1.00 21.83           N
ATOM   3018  CA  TYR A 367       9.538  35.801  54.363  1.00 21.39           C
ATOM   3019  CB  TYR A 367       8.395  35.290  55.261  1.00 21.98           C
ATOM   3020  CG  TYR A 367       7.455  34.230  54.697  1.00 23.28           C
ATOM   3021  CD1 TYR A 367       7.756  32.860  54.827  1.00 23.44           C
ATOM   3022  CE1 TYR A 367       6.876  31.873  54.352  1.00 26.29           C
ATOM   3023  CZ  TYR A 367       5.666  32.244  53.753  1.00 24.86           C
ATOM   3024  OH  TYR A 367       4.811  31.244  53.286  1.00 28.47           O
ATOM   3025  CE2 TYR A 367       5.337  33.605  53.610  1.00 26.18           C
ATOM   3026  CD2 TYR A 367       6.236  34.589  54.094  1.00 23.36           C
ATOM   3027  C   TYR A 367      10.351  36.761  55.218  1.00 20.39           C
ATOM   3028  O   TYR A 367      11.167  36.345  56.048  1.00 19.73           O
ATOM   3029  N   THR A 368      10.098  38.051  55.059  1.00 20.76           N
ATOM   3030  CA  THR A 368      10.709  39.059  55.896  1.00 21.71           C
ATOM   3031  CB  THR A 368      11.900  39.749  55.192  1.00 22.48           C
ATOM   3032  OG1 THR A 368      12.868  38.767  54.754  1.00 22.13           O
ATOM   3033  CG2 THR A 368      12.650  40.621  56.216  1.00 22.39           C
ATOM   3034  C   THR A 368       9.691  40.146  56.205  1.00 22.22           C
ATOM   3035  O   THR A 368       9.150  40.757  55.284  1.00 22.62           O
ATOM   3036  N   ARG A 369       9.453  40.382  57.496  1.00 22.23           N
ATOM   3037  CA  ARG A 369       8.646  41.518  57.908  1.00 22.85           C
ATOM   3038  CB  ARG A 369       7.626  41.110  58.970  1.00 23.69           C
ATOM   3039  CG  ARG A 369       6.261  41.774  58.730  1.00 28.40           C
ATOM   3040  CD  ARG A 369       6.112  43.183  59.252  1.00 26.60           C
ATOM   3041  NE  ARG A 369       6.885  44.144  58.482  1.00 24.86           N
ATOM   3042  CZ  ARG A 369       7.488  45.210  59.017  1.00 24.81           C
ATOM   3043  NH1 ARG A 369       7.403  45.452  60.335  1.00 23.24           N
ATOM   3044  NH2 ARG A 369       8.185  46.014  58.233  1.00 22.27           N
ATOM   3045  C   ARG A 369       9.633  42.542  58.446  1.00 21.91           C
ATOM   3046  O   ARG A 369      10.046  42.483  59.605  1.00 22.12           O
ATOM   3047  N   GLY A 370      10.083  43.430  57.573  1.00 20.95           N
ATOM   3048  CA  GLY A 370      11.211  44.298  57.931  1.00 22.15           C
ATOM   3049  C   GLY A 370      11.554  45.194  56.764  1.00 22.47           C
ATOM   3050  O   GLY A 370      10.688  45.505  55.972  1.00 22.59           O
ATOM   3051  N   SER A 371      12.819  45.587  56.658  1.00 22.98           N
ATOM   3052  CA  SER A 371      13.238  46.457  55.549  1.00 24.56           C
ATOM   3053  CB  SER A 371      14.477  47.250  55.928  1.00 24.52           C
ATOM   3054  OG  SER A 371      15.638  46.426  55.950  1.00 24.72           O
ATOM   3055  C   SER A 371      13.519  45.659  54.274  1.00 24.75           C
ATOM   3056  O   SER A 371      13.745  44.449  54.344  1.00 24.31           O
ATOM   3057  N   ASP A 372      13.544  46.345  53.124  1.00 25.23           N
ATOM   3058  CA  ASP A 372      13.889  45.698  51.857  1.00 25.92           C
ATOM   3059  CB  ASP A 372      13.695  46.637  50.662  1.00 27.18           C
ATOM   3060  CG  ASP A 372      14.705  47.762  50.610  1.00 32.45           C
ATOM   3061  OD1 ASP A 372      15.063  48.322  51.688  1.00 35.15           O
ATOM   3062  OD2 ASP A 372      15.197  48.148  49.508  1.00 40.09           O
ATOM   3063  C   ASP A 372      15.307  45.134  51.910  1.00 25.71           C
ATOM   3064  O   ASP A 372      15.568  44.043  51.398  1.00 24.84           O
ATOM   3065  N   GLU A 373      16.207  45.869  52.552  1.00 24.79           N
ATOM   3066  CA  GLU A 373      17.572  45.376  52.760  1.00 25.51           C
ATOM   3067  CB  GLU A 373      18.486  46.460  53.320  1.00 25.97           C
ATOM   3068  CG  GLU A 373      19.787  45.890  53.873  1.00 30.30           C
ATOM   3069  CD  GLU A 373      20.917  46.891  53.948  1.00 33.25           C
ATOM   3070  OE1 GLU A 373      20.642  48.098  54.004  1.00 32.02           O
ATOM   3071  OE2 GLU A 373      22.077  46.439  53.967  1.00 33.83           O
ATOM   3072  C   GLU A 373      17.638  44.077  53.607  1.00 24.29           C
ATOM   3073  O   GLU A 373      18.374  43.131  53.271  1.00 23.76           O
ATOM   3074  N   GLN A 374      16.879  44.025  54.699  1.00 22.54           N
ATOM   3075  CA  GLN A 374      16.784  42.782  55.464  1.00 22.77           C
ATOM   3076  CB  GLN A 374      15.882  42.949  56.694  1.00 21.78           C
ATOM   3077  CG  GLN A 374      16.526  43.713  57.838  1.00 23.64           C
ATOM   3078  CD  GLN A 374      15.530  43.924  58.983  1.00 23.14           C
ATOM   3079  OE1 GLN A 374      15.749  43.471  60.117  1.00 28.29           O
ATOM   3080  NE2 GLN A 374      14.421  44.548  58.670  1.00 18.11           N
ATOM   3081  C   GLN A 374      16.249  41.656  54.614  1.00 21.82           C
ATOM   3082  O   GLN A 374      16.735  40.521  54.739  1.00 23.82           O
ATOM   3083  N   HIS A 375      15.255  41.929  53.761  1.00 21.32           N
ATOM   3084  CA  HIS A 375      14.734  40.855  52.929  1.00 21.84           C
ATOM   3085  CB  HIS A 375      13.480  41.231  52.170  1.00 21.25           C
ATOM   3086  CG  HIS A 375      12.873  40.056  51.472  1.00 21.68           C
ATOM   3087  ND1 HIS A 375      12.838  39.931  50.099  1.00 25.19           N
ATOM   3088  CE1 HIS A 375      12.262  38.781  49.782  1.00 23.99           C
ATOM   3089  NE2 HIS A 375      11.949  38.149  50.899  1.00 25.28           N
ATOM   3090  CD2 HIS A 375      12.343  38.914  51.969  1.00 19.84           C
ATOM   3091  C   HIS A 375      15.777  40.384  51.914  1.00 23.12           C
ATOM   3092  O   HIS A 375      15.929  39.185  51.672  1.00 22.47           O
ATOM   3093  N   LEU A 376      16.486  41.341  51.314  1.00 23.31           N
ATOM   3094  CA  LEU A 376      17.557  40.981  50.380  1.00 23.88           C
ATOM   3095  CB  LEU A 376      18.208  42.260  49.820  1.00 24.56           C
ATOM   3096  CG  LEU A 376      17.863  42.787  48.413  1.00 27.11           C
ATOM   3097  CD1 LEU A 376      16.686  42.183  47.660  1.00 29.90           C
ATOM   3098  CD2 LEU A 376      17.756  44.321  48.456  1.00 29.22           C
ATOM   3099  C   LEU A 376      18.604  40.054  51.008  1.00 23.94           C
ATOM   3100  O   LEU A 376      19.008  39.069  50.394  1.00 24.71           O
ATOM   3101  N   LYS A 377      19.043  40.365  52.218  1.00 23.44           N
ATOM   3102  CA  LYS A 377      19.963  39.524  52.981  1.00 23.92           C
ATOM   3103  CB  LYS A 377      20.343  40.190  54.305  1.00 24.98           C
ATOM   3104  CG  LYS A 377      21.710  40.913  54.295  1.00 30.80           C
ATOM   3105  CD  LYS A 377      21.554  42.397  54.138  1.00 35.09           C
ATOM   3106  CE  LYS A 377      21.199  42.746  52.687  1.00 33.74           C
ATOM   3107  NZ  LYS A 377      21.004  44.178  52.459  1.00 36.44           N
ATOM   3108  C   LYS A 377      19.423  38.105  53.272  1.00 23.71           C
ATOM   3109  O   LYS A 377      20.051  37.098  52.912  1.00 23.13           O
ATOM   3110  N   TRP A 378      18.266  38.037  53.914  1.00 22.95           N
ATOM   3111  CA  TRP A 378      17.627  36.746  54.228  1.00 22.27           C
ATOM   3112  CB  TRP A 378      16.356  37.003  55.069  1.00 22.63           C
ATOM   3113  CG  TRP A 378      15.553  35.780  55.439  1.00 22.26           C
ATOM   3114  CD1 TRP A 378      14.204  35.629  55.305  1.00 22.71           C
ATOM   3115  NE1 TRP A 378      13.807  34.400  55.774  1.00 23.90           N
ATOM   3116  CE2 TRP A 378      14.916  33.708  56.203  1.00 23.91           C
ATOM   3117  CD2 TRP A 378      16.040  34.547  55.998  1.00 22.91           C
ATOM   3118  CE3 TRP A 378      17.308  34.068  56.356  1.00 22.02           C
ATOM   3119  CZ3 TRP A 378      17.431  32.784  56.894  1.00 24.03           C
ATOM   3120  CH2 TRP A 378      16.290  31.960  57.083  1.00 22.71           C
ATOM   3121  CZ2 TRP A 378      15.027  32.402  56.738  1.00 24.10           C
ATOM   3122  C   TRP A 378      17.309  35.925  52.974  1.00 22.05           C
ATOM   3123  O   TRP A 378      17.707  34.746  52.870  1.00 22.30           O
ATOM   3124  N   SER A 379      16.593  36.521  52.015  1.00 22.33           N
ATOM   3125  CA  SER A 379      16.213  35.798  50.792  1.00 22.50           C
ATOM   3126  CB  SER A 379      15.218  36.605  49.948  1.00 23.15           C
ATOM   3127  OG  SER A 379      15.796  37.788  49.407  1.00 25.07           O
ATOM   3128  C   SER A 379      17.453  35.355  49.960  1.00 23.15           C
ATOM   3129  O   SER A 379      17.463  34.253  49.383  1.00 21.71           O
ATOM   3130  N   GLY A 380      18.496  36.179  49.952  1.00 23.03           N
ATOM   3131  CA  GLY A 380      19.767  35.830  49.275  1.00 23.15           C
ATOM   3132  C   GLY A 380      20.439  34.620  49.919  1.00 22.28           C
ATOM   3133  O   GLY A 380      20.989  33.755  49.232  1.00 22.91           O
ATOM   3134  N   LEU A 381      20.424  34.574  51.239  1.00 21.89           N
ATOM   3135  CA ALEU A 381      21.014  33.459  51.967  0.50 21.81           C
ATOM   3136  CA BLEU A 381      21.005  33.448  51.976  0.50 21.74           C
ATOM   3137  CB ALEU A 381      20.975  33.742  53.477  0.50 21.81           C
ATOM   3138  CB BLEU A 381      20.895  33.679  53.484  0.50 21.70           C
ATOM   3139  CG ALEU A 381      21.405  32.692  54.507  0.50 22.42           C
ATOM   3140  CG BLEU A 381      21.398  32.620  54.474  0.50 21.96           C
ATOM   3141  CD1ALEU A 381      20.269  31.711  54.794  0.50 24.25           C
ATOM   3142  CD1BLEU A 381      21.085  33.138  55.836  0.50 21.17           C
ATOM   3143  CD2ALEU A 381      22.700  31.970  54.110  0.50 20.82           C
ATOM   3144  CD2BLEU A 381      20.786  31.222  54.320  0.50 22.57           C
ATOM   3145  C   LEU A 381      20.275  32.159  51.606  1.00 21.82           C
ATOM   3146  O   LEU A 381      20.913  31.144  51.244  1.00 20.70           O
ATOM   3147  N   VAL A 382      18.947  32.200  51.702  1.00 21.65           N
ATOM   3148  CA  VAL A 382      18.102  31.027  51.426  1.00 22.24           C
ATOM   3149  CB  VAL A 382      16.629  31.309  51.706  1.00 22.19           C
ATOM   3150  CG1 VAL A 382      15.741  30.123  51.238  1.00 21.60           C
ATOM   3151  CG2 VAL A 382      16.410  31.628  53.208  1.00 20.26           C
ATOM   3152  C   VAL A 382      18.286  30.574  49.974  1.00 22.23           C
ATOM   3153  O   VAL A 382      18.480  29.386  49.708  1.00 22.19           O
ATOM   3154  N   GLU A 383      18.219  31.537  49.053  1.00 22.16           N
ATOM   3155  CA AGLU A 383      18.414  31.257  47.630  0.50 21.92           C
ATOM   3156  CA BGLU A 383      18.426  31.294  47.625  0.50 22.22           C
ATOM   3157  CB AGLU A 383      18.309  32.549  46.813  0.50 22.33           C
ATOM   3158  CB BGLU A 383      18.425  32.633  46.870  0.50 22.37           C
ATOM   3159  CG AGLU A 383      16.870  33.001  46.652  0.50 22.05           C
ATOM   3160  CG BGLU A 383      18.353  32.474  45.365  0.50 22.19           C
ATOM   3161  CD AGLU A 383      16.734  34.408  46.116  0.50 23.16           C
ATOM   3162  CD BGLU A 383      18.427  33.783  44.601  0.50 23.66           C
ATOM   3163  OE1AGLU A 383      17.591  34.848  45.313  0.50 23.61           O
ATOM   3164  OE1BGLU A 383      18.797  34.813  45.199  0.50 26.22           O
ATOM   3165  OE2AGLU A 383      15.750  35.073  46.492  0.50 23.28           O
ATOM   3166  OE2BGLU A 383      18.134  33.760  43.387  0.50 25.24           O
ATOM   3167  C   GLU A 383      19.735  30.544  47.373  1.00 21.74           C
ATOM   3168  O   GLU A 383      19.791  29.587  46.566  1.00 21.10           O
ATOM   3169  N   SER A 384      20.783  30.974  48.066  1.00 21.32           N
ATOM   3170  CA  SER A 384      22.129  30.398  47.906  1.00 21.13           C
ATOM   3171  CB  SER A 384      23.203  31.233  48.632  1.00 21.06           C
ATOM   3172  OG  SER A 384      23.265  30.975  50.026  1.00 21.06           O
ATOM   3173  C   SER A 384      22.221  28.936  48.369  1.00 21.00           C
ATOM   3174  O   SER A 384      23.132  28.252  47.988  1.00 21.32           O
ATOM   3175  N   LYS A 385      21.266  28.473  49.177  1.00 20.88           N
ATOM   3176  CA  LYS A 385      21.279  27.095  49.691  1.00 21.14           C
ATOM   3177  CB  LYS A 385      20.888  27.107  51.184  1.00 21.17           C
ATOM   3178  CG  LYS A 385      21.734  28.091  52.020  1.00 24.58           C
ATOM   3179  CD  LYS A 385      23.167  27.686  52.093  1.00 28.44           C
ATOM   3180  CE  LYS A 385      23.834  28.376  53.263  1.00 33.62           C
ATOM   3181  NZ  LYS A 385      25.315  28.218  53.194  1.00 35.84           N
ATOM   3182  C   LYS A 385      20.366  26.122  48.952  1.00 20.01           C
ATOM   3183  O   LYS A 385      20.374  24.920  49.235  1.00 19.99           O
ATOM   3184  N   VAL A 386      19.552  26.643  48.052  1.00 19.39           N
ATOM   3185  CA  VAL A 386      18.561  25.833  47.351  1.00 19.78           C
ATOM   3186  CB  VAL A 386      17.707  26.692  46.395  1.00 18.88           C
ATOM   3187  CG1 VAL A 386      16.927  25.852  45.406  1.00 20.37           C
ATOM   3188  CG2 VAL A 386      16.776  27.653  47.201  1.00 21.60           C
ATOM   3189  C   VAL A 386      19.203  24.639  46.636  1.00 20.24           C
ATOM   3190  O   VAL A 386      18.668  23.524  46.656  1.00 18.42           O
ATOM   3191  N   ARG A 387      20.351  24.867  46.007  1.00 19.47           N
ATOM   3192  CA  ARG A 387      21.064  23.748  45.357  1.00 20.23           C
ATOM   3193  CB  ARG A 387      22.299  24.267  44.596  1.00 19.98           C
ATOM   3194  CG  ARG A 387      23.385  24.788  45.473  1.00 20.67           C
ATOM   3195  CD  ARG A 387      24.581  25.435  44.738  1.00 21.15           C
ATOM   3196  NE  ARG A 387      25.564  25.846  45.735  1.00 23.52           N
ATOM   3197  CZ  ARG A 387      26.440  25.051  46.335  1.00 22.24           C
ATOM   3198  NH1 ARG A 387      26.556  23.759  46.010  1.00 21.19           N
ATOM   3199  NH2 ARG A 387      27.228  25.559  47.270  1.00 23.89           N
ATOM   3200  C   ARG A 387      21.457  22.620  46.330  1.00 21.00           C
ATOM   3201  O   ARG A 387      21.488  21.461  45.941  1.00 20.40           O
ATOM   3202  N   LEU A 388      21.774  22.962  47.578  1.00 20.53           N
ATOM   3203  CA  LEU A 388      22.036  21.937  48.621  1.00 22.81           C
ATOM   3204  CB  LEU A 388      22.512  22.581  49.932  1.00 22.15           C
ATOM   3205  CG  LEU A 388      23.623  23.617  49.783  1.00 23.78           C
ATOM   3206  CD1 LEU A 388      23.968  24.163  51.140  1.00 25.46           C
ATOM   3207  CD2 LEU A 388      24.852  23.016  49.096  1.00 22.48           C
ATOM   3208  C   LEU A 388      20.814  21.030  48.876  1.00 22.34           C
ATOM   3209  O   LEU A 388      20.958  19.811  49.109  1.00 23.28           O
ATOM   3210  N   LEU A 389      19.624  21.615  48.795  1.00 22.63           N
ATOM   3211  CA  LEU A 389      18.380  20.871  48.945  1.00 23.05           C
ATOM   3212  CB  LEU A 389      17.193  21.827  49.115  1.00 23.26           C
ATOM   3213  CG  LEU A 389      15.780  21.254  49.141  1.00 23.83           C
ATOM   3214  CD1 LEU A 389      15.672  20.071  50.136  1.00 23.29           C
ATOM   3215  CD2 LEU A 389      14.765  22.359  49.473  1.00 23.97           C
ATOM   3216  C   LEU A 389      18.174  19.984  47.734  1.00 23.19           C
ATOM   3217  O   LEU A 389      17.827  18.806  47.869  1.00 22.28           O
ATOM   3218  N   VAL A 390      18.418  20.547  46.551  1.00 21.94           N
ATOM   3219  CA  VAL A 390      18.368  19.777  45.299  1.00 21.70           C
ATOM   3220  CB  VAL A 390      18.809  20.650  44.079  1.00 21.45           C
ATOM   3221  CG1 VAL A 390      19.081  19.764  42.838  1.00 20.62           C
ATOM   3222  CG2 VAL A 390      17.738  21.696  43.741  1.00 19.71           C
ATOM   3223  C   VAL A 390      19.253  18.536  45.388  1.00 22.33           C
ATOM   3224  O   VAL A 390      18.851  17.440  44.962  1.00 22.59           O
ATOM   3225  N   MET A 391      20.458  18.695  45.929  1.00 22.40           N
ATOM   3226  CA  MET A 391      21.407  17.592  45.997  1.00 24.51           C
ATOM   3227  CB  MET A 391      22.786  18.093  46.356  1.00 23.68           C
ATOM   3228  CG  MET A 391      23.417  18.927  45.222  1.00 24.45           C
ATOM   3229  SD  MET A 391      25.155  19.135  45.489  1.00 32.95           S
ATOM   3230  CE  MET A 391      25.104  20.391  46.685  1.00 23.39           C
ATOM   3231  C   MET A 391      20.959  16.542  47.002  1.00 24.23           C
ATOM   3232  O   MET A 391      21.164  15.341  46.782  1.00 23.58           O
ATOM   3233  N   LYS A 392      20.332  16.994  48.083  1.00 23.42           N
ATOM   3234  CA  LYS A 392      19.855  16.045  49.113  1.00 24.70           C
ATOM   3235  CB  LYS A 392      19.493  16.757  50.408  1.00 24.09           C
ATOM   3236  CG  LYS A 392      20.689  17.187  51.218  1.00 28.48           C
ATOM   3237  CD  LYS A 392      20.258  18.234  52.261  1.00 33.36           C
ATOM   3238  CE  LYS A 392      21.453  18.954  52.852  1.00 33.68           C
ATOM   3239  NZ  LYS A 392      22.405  18.008  53.487  1.00 35.55           N
ATOM   3240  C   LYS A 392      18.680  15.262  48.599  1.00 24.14           C
ATOM   3241  O   LYS A 392      18.605  14.030  48.803  1.00 25.48           O
ATOM   3242  N   LEU A 393      17.798  15.949  47.888  1.00 22.32           N
ATOM   3243  CA  LEU A 393      16.630  15.327  47.278  1.00 23.10           C
ATOM   3244  CB  LEU A 393      15.665  16.361  46.723  1.00 22.62           C
ATOM   3245  CG  LEU A 393      14.837  17.231  47.689  1.00 23.52           C
ATOM   3246  CD1 LEU A 393      14.222  18.388  46.976  1.00 22.29           C
ATOM   3247  CD2 LEU A 393      13.714  16.401  48.417  1.00 24.77           C
ATOM   3248  C   LEU A 393      16.967  14.313  46.188  1.00 23.54           C
ATOM   3249  O   LEU A 393      16.408  13.205  46.165  1.00 23.80           O
ATOM   3250  N   GLU A 394      17.877  14.695  45.293  1.00 22.95           N
ATOM   3251  CA  GLU A 394      18.166  13.892  44.108  1.00 23.78           C
ATOM   3252  CB  GLU A 394      19.019  14.710  43.106  1.00 22.23           C
ATOM   3253  CG  GLU A 394      20.497  14.784  43.445  1.00 21.73           C
ATOM   3254  CD  GLU A 394      21.230  15.763  42.534  1.00 21.46           C
ATOM   3255  OE1 GLU A 394      20.571  16.404  41.726  1.00 19.24           O
ATOM   3256  OE2 GLU A 394      22.449  15.879  42.626  1.00 22.52           O
ATOM   3257  C   GLU A 394      18.845  12.554  44.402  1.00 24.92           C
ATOM   3258  O   GLU A 394      18.875  11.695  43.514  1.00 26.07           O
ATOM   3259  N   VAL A 395      19.410  12.378  45.601  1.00 26.42           N
ATOM   3260  CA  VAL A 395      19.981  11.076  46.011  1.00 27.63           C
ATOM   3261  CB  VAL A 395      21.278  11.212  46.888  1.00 27.29           C
ATOM   3262  CG1 VAL A 395      22.348  12.051  46.148  1.00 27.97           C
ATOM   3263  CG2 VAL A 395      20.959  11.810  48.228  1.00 26.53           C
ATOM   3264  C   VAL A 395      18.970  10.146  46.709  1.00 29.02           C
ATOM   3265  O   VAL A 395      19.309   8.993  47.037  1.00 29.96           O
ATOM   3266  N   LEU A 396      17.757  10.639  46.953  1.00 29.90           N
ATOM   3267  CA  LEU A 396      16.709   9.798  47.562  1.00 31.32           C
ATOM   3268  CB  LEU A 396      15.533  10.626  48.058  1.00 30.81           C
ATOM   3269  CG  LEU A 396      15.645  11.531  49.284  1.00 31.56           C
ATOM   3270  CD1 LEU A 396      14.252  12.116  49.557  1.00 29.59           C
ATOM   3271  CD2 LEU A 396      16.210  10.805  50.523  1.00 30.06           C
ATOM   3272  C   LEU A 396      16.226   8.762  46.564  1.00 31.76           C
ATOM   3273  O   LEU A 396      15.998   9.062  45.394  1.00 31.49           O
ATOM   3274  N   ALA A 397      16.093   7.519  47.028  1.00 32.81           N
ATOM   3275  CA  ALA A 397      15.764   6.412  46.133  1.00 33.39           C
ATOM   3276  CB  ALA A 397      15.655   5.082  46.940  1.00 33.32           C
ATOM   3277  C   ALA A 397      14.504   6.679  45.296  1.00 32.97           C
ATOM   3278  O   ALA A 397      14.477   6.442  44.086  1.00 34.40           O
ATOM   3279  N   GLY A 398      13.477   7.220  45.924  1.00 32.78           N
ATOM   3280  CA  GLY A 398      12.240   7.496  45.217  1.00 32.20           C
ATOM   3281  C   GLY A 398      12.222   8.704  44.292  1.00 32.04           C
ATOM   3282  O   GLY A 398      11.222   8.942  43.623  1.00 32.99           O
ATOM   3283  N   ILE A 399      13.315   9.469  44.236  1.00 31.31           N
ATOM   3284  CA  ILE A 399      13.336  10.667  43.380  1.00 29.07           C
ATOM   3285  CB  ILE A 399      13.969  11.863  44.108  1.00 29.08           C
ATOM   3286  CG1 ILE A 399      13.278  12.148  45.456  1.00 29.74           C
ATOM   3287  CD1 ILE A 399      12.113  13.087  45.384  1.00 30.94           C
ATOM   3288  CG2 ILE A 399      13.963  13.094  43.166  1.00 29.46           C
ATOM   3289  C   ILE A 399      14.055  10.447  42.038  1.00 27.62           C
ATOM   3290  O   ILE A 399      15.238  10.095  41.997  1.00 27.68           O
ATOM   3291  N   LYS A 400      13.336  10.691  40.961  1.00 26.76           N
ATOM   3292  CA  LYS A 400      13.874  10.597  39.610  1.00 26.98           C
ATOM   3293  CB  LYS A 400      12.739  10.297  38.639  1.00 27.88           C
ATOM   3294  CG  LYS A 400      13.183  10.053  37.225  1.00 31.10           C
ATOM   3295  CD  LYS A 400      11.974   9.642  36.394  1.00 36.78           C
ATOM   3296  CE  LYS A 400      12.356   8.619  35.348  1.00 39.04           C
ATOM   3297  NZ  LYS A 400      12.812   9.279  34.096  1.00 41.02           N
ATOM   3298  C   LYS A 400      14.591  11.892  39.200  1.00 27.04           C
ATOM   3299  O   LYS A 400      15.638  11.859  38.550  1.00 26.20           O
ATOM   3300  N   ILE A 401      14.010  13.031  39.560  1.00 26.24           N
ATOM   3301  CA  ILE A 401      14.700  14.319  39.362  1.00 24.66           C
ATOM   3302  CB  ILE A 401      14.553  14.850  37.893  1.00 24.78           C
ATOM   3303  CG1 ILE A 401      15.743  15.753  37.523  1.00 24.14           C
ATOM   3304  CD1 ILE A 401      15.784  16.129  36.062  1.00 23.83           C
ATOM   3305  CG2 ILE A 401      13.215  15.619  37.649  1.00 24.91           C
ATOM   3306  C   ILE A 401      14.223  15.351  40.383  1.00 24.76           C
ATOM   3307  O   ILE A 401      13.055  15.322  40.828  1.00 23.95           O
ATOM   3308  N   ALA A 402      15.148  16.240  40.778  1.00 23.38           N
ATOM   3309  CA  ALA A 402      14.785  17.431  41.568  1.00 21.96           C
ATOM   3310  CB  ALA A 402      15.353  17.343  42.981  1.00 22.28           C
ATOM   3311  C   ALA A 402      15.359  18.622  40.786  1.00 21.22           C
ATOM   3312  O   ALA A 402      16.561  18.877  40.811  1.00 21.57           O
ATOM   3313  N   HIS A 403      14.483  19.321  40.078  1.00 20.54           N
ATOM   3314  CA  HIS A 403      14.879  20.287  39.065  1.00 20.63           C
ATOM   3315  CB  HIS A 403      14.091  19.952  37.790  1.00 20.28           C
ATOM   3316  CG  HIS A 403      14.302  20.887  36.638  1.00 21.40           C
ATOM   3317  ND1 HIS A 403      13.760  20.648  35.390  1.00 21.11           N
ATOM   3318  CE1 HIS A 403      14.061  21.652  34.584  1.00 21.09           C
ATOM   3319  NE2 HIS A 403      14.762  22.542  35.270  1.00 18.68           N
ATOM   3320  CD2 HIS A 403      14.943  22.076  36.551  1.00 18.24           C
ATOM   3321  C   HIS A 403      14.569  21.710  39.573  1.00 20.51           C
ATOM   3322  O   HIS A 403      13.407  22.128  39.581  1.00 21.18           O
ATOM   3323  N   PRO A 404      15.597  22.475  39.941  1.00 21.06           N
ATOM   3324  CA  PRO A 404      15.377  23.847  40.444  1.00 20.53           C
ATOM   3325  CB  PRO A 404      16.705  24.165  41.140  1.00 20.81           C
ATOM   3326  CG  PRO A 404      17.757  23.397  40.272  1.00 20.49           C
ATOM   3327  CD  PRO A 404      17.033  22.113  39.913  1.00 20.50           C
ATOM   3328  C   PRO A 404      15.093  24.819  39.287  1.00 21.53           C
ATOM   3329  O   PRO A 404      15.766  24.748  38.248  1.00 20.02           O
ATOM   3330  N   PHE A 405      14.079  25.682  39.433  1.00 21.35           N
ATOM   3331  CA  PHE A 405      13.853  26.763  38.451  1.00 21.35           C
ATOM   3332  CB  PHE A 405      12.445  27.358  38.597  1.00 21.99           C
ATOM   3333  CG  PHE A 405      12.032  28.270  37.476  1.00 22.01           C
ATOM   3334  CD1 PHE A 405      12.041  27.823  36.142  1.00 23.06           C
ATOM   3335  CE1 PHE A 405      11.658  28.657  35.108  1.00 23.82           C
ATOM   3336  CZ  PHE A 405      11.253  29.983  35.379  1.00 23.49           C
ATOM   3337  CE2 PHE A 405      11.257  30.449  36.696  1.00 23.81           C
ATOM   3338  CD2 PHE A 405      11.654  29.604  37.737  1.00 23.00           C
ATOM   3339  C   PHE A 405      14.936  27.809  38.717  1.00 22.13           C
ATOM   3340  O   PHE A 405      15.560  27.777  39.762  1.00 22.22           O
ATOM   3341  N   THR A 406      15.178  28.711  37.770  1.00 21.58           N
ATOM   3342  CA  THR A 406      16.371  29.559  37.830  1.00 21.87           C
ATOM   3343  CB  THR A 406      17.007  29.652  36.455  1.00 21.45           C
ATOM   3344  OG1 THR A 406      15.992  29.933  35.480  1.00 20.53           O
ATOM   3345  CG2 THR A 406      17.589  28.299  36.048  1.00 22.22           C
ATOM   3346  C   THR A 406      16.152  30.977  38.312  1.00 22.52           C
ATOM   3347  O   THR A 406      17.101  31.762  38.325  1.00 22.14           O
ATOM   3348  N  ALYS A 407      14.928  31.320  38.693  0.50 23.00           N
ATOM   3349  N  BLYS A 407      14.914  31.307  38.676  0.50 22.91           N
ATOM   3350  CA ALYS A 407      14.690  32.647  39.256  0.50 24.06           C
ATOM   3351  CA BLYS A 407      14.577  32.646  39.171  0.50 23.99           C
ATOM   3352  CB ALYS A 407      14.362  33.683  38.173  0.50 23.85           C
ATOM   3353  CB BLYS A 407      13.862  33.480  38.096  0.50 23.44           C
ATOM   3354  CG ALYS A 407      13.048  33.458  37.459  0.50 25.44           C
ATOM   3355  CG BLYS A 407      14.329  33.268  36.648  0.50 24.28           C
ATOM   3356  CD ALYS A 407      12.367  34.779  37.161  0.50 27.37           C
ATOM   3357  CD BLYS A 407      13.776  34.342  35.708  0.50 24.75           C
ATOM   3358  CE ALYS A 407      10.849  34.630  37.184  0.50 28.43           C
ATOM   3359  CE BLYS A 407      13.607  33.799  34.275  0.50 27.25           C
ATOM   3360  NZ ALYS A 407      10.336  33.972  35.938  0.50 28.43           N
ATOM   3361  NZ BLYS A 407      13.367  34.884  33.260  0.50 28.78           N
ATOM   3362  C  ALYS A 407      13.603  32.651  40.318  0.50 24.57           C
ATOM   3363  C  BLYS A 407      13.664  32.528  40.392  0.50 24.49           C
ATOM   3364  O  ALYS A 407      12.553  32.035  40.140  0.50 24.25           O
ATOM   3365  O  BLYS A 407      12.823  31.635  40.430  0.50 24.38           O
ATOM   3366  N   PRO A 408      13.847  33.393  41.397  1.00 24.74           N
ATOM   3367  CA  PRO A 408      12.837  33.540  42.467  1.00 25.03           C
ATOM   3368  CB  PRO A 408      13.596  34.237  43.602  1.00 25.04           C
ATOM   3369  CG  PRO A 408      14.784  34.859  42.989  1.00 26.58           C
ATOM   3370  CD  PRO A 408      15.056  34.201  41.648  1.00 25.36           C
ATOM   3371  C   PRO A 408      11.659  34.376  41.998  1.00 25.00           C
ATOM   3372  O   PRO A 408      11.778  35.167  41.053  1.00 24.88           O
ATOM   3373  N   PHE A 409      10.520  34.192  42.639  1.00 24.71           N
ATOM   3374  CA  PHE A 409       9.381  35.036  42.388  1.00 25.09           C
ATOM   3375  CB  PHE A 409       8.111  34.186  42.222  1.00 26.68           C
ATOM   3376  CG  PHE A 409       8.078  33.444  40.912  1.00 26.19           C
ATOM   3377  CD1 PHE A 409       8.799  32.271  40.758  1.00 27.36           C
ATOM   3378  CE1 PHE A 409       8.822  31.601  39.536  1.00 27.08           C
ATOM   3379  CZ  PHE A 409       8.105  32.110  38.462  1.00 28.13           C
ATOM   3380  CE2 PHE A 409       7.388  33.291  38.599  1.00 29.63           C
ATOM   3381  CD2 PHE A 409       7.387  33.958  39.832  1.00 29.88           C
ATOM   3382  C   PHE A 409       9.281  35.949  43.587  1.00 26.12           C
ATOM   3383  O   PHE A 409       9.215  35.464  44.717  1.00 25.42           O
ATOM   3384  N   GLU A 410       9.289  37.255  43.338  1.00 26.10           N
ATOM   3385  CA  GLU A 410       9.245  38.237  44.422  1.00 27.76           C
ATOM   3386  CB  GLU A 410      10.239  39.374  44.173  1.00 28.45           C
ATOM   3387  CG  GLU A 410      11.585  38.917  43.686  1.00 32.76           C
ATOM   3388  CD  GLU A 410      12.352  38.211  44.766  1.00 38.70           C
ATOM   3389  OE1 GLU A 410      12.053  38.455  45.956  1.00 40.74           O
ATOM   3390  OE2 GLU A 410      13.265  37.426  44.416  1.00 44.05           O
ATOM   3391  C   GLU A 410       7.849  38.818  44.562  1.00 27.36           C
ATOM   3392  O   GLU A 410       7.190  39.159  43.562  1.00 27.21           O
ATOM   3393  N   SER A 411       7.389  38.932  45.804  1.00 26.92           N
ATOM   3394  CA  SER A 411       6.178  39.688  46.075  1.00 26.72           C
ATOM   3395  CB  SER A 411       4.930  38.793  46.009  1.00 26.57           C
ATOM   3396  OG  SER A 411       5.060  37.721  46.923  1.00 28.03           O
ATOM   3397  C   SER A 411       6.267  40.388  47.433  1.00 26.33           C
ATOM   3398  O   SER A 411       7.080  40.033  48.283  1.00 24.58           O
ATOM   3399  N   SER A 412       5.465  41.425  47.605  1.00 26.91           N
ATOM   3400  CA  SER A 412       5.380  42.089  48.912  1.00 28.60           C
ATOM   3401  CB  SER A 412       6.337  43.291  49.025  1.00 28.97           C
ATOM   3402  OG  SER A 412       6.080  44.329  48.081  1.00 29.67           O
ATOM   3403  C   SER A 412       3.951  42.464  49.259  1.00 29.40           C
ATOM   3404  O   SER A 412       3.105  42.634  48.368  1.00 29.17           O
ATOM   3405  N   TYR A 413       3.700  42.577  50.563  1.00 29.76           N
ATOM   3406  CA  TYR A 413       2.373  42.811  51.109  1.00 30.76           C
ATOM   3407  CB  TYR A 413       1.904  41.553  51.833  1.00 32.20           C
ATOM   3408  CG  TYR A 413       1.612  40.398  50.904  1.00 36.21           C
ATOM   3409  CD1 TYR A 413       2.624  39.517  50.491  1.00 38.73           C
ATOM   3410  CE1 TYR A 413       2.345  38.438  49.615  1.00 39.34           C
ATOM   3411  CZ  TYR A 413       1.049  38.257  49.158  1.00 39.38           C
ATOM   3412  OH  TYR A 413       0.732  37.201  48.310  1.00 40.49           O
ATOM   3413  CE2 TYR A 413       0.038  39.118  49.564  1.00 41.60           C
ATOM   3414  CD2 TYR A 413       0.323  40.181  50.438  1.00 38.23           C
ATOM   3415  C   TYR A 413       2.402  43.958  52.116  1.00 29.91           C
ATOM   3416  O   TYR A 413       3.363  44.091  52.873  1.00 27.91           O
ATOM   3417  N   CYS A 414       1.342  44.767  52.140  1.00 30.14           N
ATOM   3418  CA  CYS A 414       1.133  45.702  53.265  1.00 30.78           C
ATOM   3419  CB  CYS A 414      -0.017  46.666  52.959  1.00 31.39           C
ATOM   3420  SG  CYS A 414       0.337  47.738  51.546  1.00 33.68           S
ATOM   3421  C   CYS A 414       0.871  44.888  54.534  1.00 30.96           C
ATOM   3422  O   CYS A 414       0.033  43.976  54.548  1.00 30.82           O
ATOM   3423  N   CYS A 415       1.622  45.180  55.589  1.00 30.87           N
ATOM   3424  CA  CYS A 415       1.613  44.320  56.770  1.00 32.02           C
ATOM   3425  CB  CYS A 415       2.706  43.240  56.640  1.00 31.34           C
ATOM   3426  SG  CYS A 415       2.586  41.942  57.872  1.00 31.71           S
ATOM   3427  C   CYS A 415       1.718  45.109  58.087  1.00 32.87           C
ATOM   3428  O   CYS A 415       2.735  45.044  58.786  1.00 33.18           O
ATOM   3429  N   PRO A 416       0.660  45.859  58.413  1.00 34.17           N
ATOM   3430  CA  PRO A 416       0.639  46.746  59.603  1.00 35.44           C
ATOM   3431  CB  PRO A 416      -0.795  47.304  59.601  1.00 35.25           C
ATOM   3432  CG  PRO A 416      -1.259  47.186  58.199  1.00 35.47           C
ATOM   3433  CD  PRO A 416      -0.598  45.946  57.646  1.00 34.34           C
ATOM   3434  C   PRO A 416       0.922  46.088  60.960  1.00 36.11           C
ATOM   3435  O   PRO A 416       1.558  46.724  61.813  1.00 36.03           O
ATOM   3436  N   THR A 417       0.474  44.842  61.166  1.00 36.81           N
ATOM   3437  CA  THR A 417       0.566  44.213  62.497  1.00 37.35           C
ATOM   3438  CB  THR A 417      -0.833  43.994  63.104  1.00 37.80           C
ATOM   3439  OG1 THR A 417      -1.579  43.085  62.269  1.00 37.21           O
ATOM   3440  CG2 THR A 417      -1.657  45.300  63.101  1.00 38.46           C
ATOM   3441  C   THR A 417       1.273  42.871  62.504  1.00 37.63           C
ATOM   3442  O   THR A 417       1.429  42.234  61.456  1.00 37.08           O
ATOM   3443  N   GLU A 418       1.643  42.439  63.712  1.00 38.40           N
ATOM   3444  CA  GLU A 418       2.210  41.117  63.958  1.00 39.43           C
ATOM   3445  CB  GLU A 418       2.516  40.903  65.455  1.00 39.65           C
ATOM   3446  CG  GLU A 418       3.831  41.511  65.951  1.00 41.49           C
ATOM   3447  CD  GLU A 418       4.279  40.932  67.291  1.00 42.34           C
ATOM   3448  OE1 GLU A 418       3.465  40.244  67.957  1.00 45.95           O
ATOM   3449  OE2 GLU A 418       5.451  41.156  67.685  1.00 47.46           O
ATOM   3450  C   GLU A 418       1.271  40.040  63.431  1.00 39.04           C
ATOM   3451  O   GLU A 418       1.717  39.096  62.777  1.00 38.56           O
ATOM   3452  N   ASP A 419      -0.027  40.216  63.696  1.00 39.02           N
ATOM   3453  CA  ASP A 419      -1.090  39.301  63.259  1.00 38.88           C
ATOM   3454  CB  ASP A 419      -2.446  39.731  63.852  1.00 40.07           C
ATOM   3455  CG  ASP A 419      -2.529  39.498  65.348  1.00 42.42           C
ATOM   3456  OD1 ASP A 419      -3.582  39.834  65.934  1.00 47.79           O
ATOM   3457  OD2 ASP A 419      -1.607  38.993  66.032  1.00 43.97           O
ATOM   3458  C   ASP A 419      -1.208  39.129  61.742  1.00 37.95           C
ATOM   3459  O   ASP A 419      -1.332  37.999  61.255  1.00 37.89           O
ATOM   3460  N   ASP A 420      -1.186  40.246  61.009  1.00 36.64           N
ATOM   3461  CA  ASP A 420      -1.112  40.248  59.542  1.00 35.41           C
ATOM   3462  CB  ASP A 420      -0.991  41.683  59.017  1.00 36.27           C
ATOM   3463  CG  ASP A 420      -2.263  42.488  59.212  1.00 39.49           C
ATOM   3464  OD1 ASP A 420      -2.151  43.718  59.454  1.00 40.65           O
ATOM   3465  OD2 ASP A 420      -3.409  41.965  59.159  1.00 42.24           O
ATOM   3466  C   ASP A 420       0.074  39.444  59.005  1.00 33.24           C
ATOM   3467  O   ASP A 420      -0.052  38.744  58.002  1.00 32.88           O
ATOM   3468  N   TYR A 421       1.228  39.574  59.652  1.00 31.21           N
ATOM   3469  CA  TYR A 421       2.409  38.803  59.217  1.00 30.51           C
ATOM   3470  CB  TYR A 421       3.671  39.235  59.970  1.00 28.18           C
ATOM   3471  CG  TYR A 421       4.962  38.583  59.482  1.00 25.16           C
ATOM   3472  CD1 TYR A 421       5.177  38.316  58.126  1.00 23.46           C
ATOM   3473  CE1 TYR A 421       6.404  37.733  57.666  1.00 23.93           C
ATOM   3474  CZ  TYR A 421       7.399  37.420  58.587  1.00 24.00           C
ATOM   3475  OH  TYR A 421       8.605  36.857  58.161  1.00 25.20           O
ATOM   3476  CE2 TYR A 421       7.195  37.686  59.945  1.00 23.99           C
ATOM   3477  CD2 TYR A 421       5.980  38.264  60.384  1.00 20.95           C
ATOM   3478  C   TYR A 421       2.178  37.294  59.374  1.00 31.14           C
ATOM   3479  O   TYR A 421       2.547  36.511  58.486  1.00 32.03           O
ATOM   3480  N   GLU A 422       1.582  36.899  60.497  1.00 31.84           N
ATOM   3481  CA  GLU A 422       1.209  35.491  60.708  1.00 32.88           C
ATOM   3482  CB  GLU A 422       0.683  35.264  62.125  1.00 32.82           C
ATOM   3483  CG  GLU A 422       1.761  35.346  63.205  1.00 34.95           C
ATOM   3484  CD  GLU A 422       2.735  34.169  63.185  1.00 39.41           C
ATOM   3485  OE1 GLU A 422       2.497  33.157  62.480  1.00 41.93           O
ATOM   3486  OE2 GLU A 422       3.764  34.258  63.884  1.00 42.81           O
ATOM   3487  C   GLU A 422       0.187  35.026  59.665  1.00 33.19           C
ATOM   3488  O   GLU A 422       0.257  33.898  59.175  1.00 33.08           O
ATOM   3489  N   MET A 423      -0.749  35.904  59.306  1.00 33.89           N
ATOM   3490  CA  MET A 423      -1.715  35.586  58.254  1.00 34.97           C
ATOM   3491  CB  MET A 423      -2.828  36.654  58.204  1.00 36.60           C
ATOM   3492  CG  MET A 423      -3.731  36.584  56.949  1.00 39.76           C
ATOM   3493  SD  MET A 423      -2.917  37.331  55.490  1.00 52.45           S
ATOM   3494  CE  MET A 423      -3.941  36.730  54.148  1.00 43.84           C
ATOM   3495  C   MET A 423      -1.074  35.382  56.877  1.00 34.18           C
ATOM   3496  O   MET A 423      -1.479  34.497  56.098  1.00 34.23           O
ATOM   3497  N   ILE A 424      -0.104  36.230  56.543  1.00 33.04           N
ATOM   3498  CA  ILE A 424       0.593  36.085  55.272  1.00 33.22           C
ATOM   3499  CB  ILE A 424       1.584  37.244  55.043  1.00 32.83           C
ATOM   3500  CG1 ILE A 424       0.800  38.528  54.762  1.00 34.09           C
ATOM   3501  CD1 ILE A 424       1.592  39.800  55.004  1.00 33.08           C
ATOM   3502  CG2 ILE A 424       2.498  36.946  53.854  1.00 32.17           C
ATOM   3503  C   ILE A 424       1.285  34.721  55.176  1.00 32.89           C
ATOM   3504  O   ILE A 424       1.238  34.086  54.141  1.00 32.60           O
ATOM   3505  N   GLN A 425       1.902  34.268  56.267  1.00 34.29           N
ATOM   3506  CA  GLN A 425       2.585  32.952  56.280  1.00 34.84           C
ATOM   3507  CB  GLN A 425       3.395  32.786  57.559  1.00 34.45           C
ATOM   3508  CG  GLN A 425       4.512  33.801  57.684  1.00 29.72           C
ATOM   3509  CD  GLN A 425       5.177  33.761  59.024  1.00 26.19           C
ATOM   3510  OE1 GLN A 425       5.787  32.753  59.398  1.00 25.24           O
ATOM   3511  NE2 GLN A 425       5.060  34.853  59.766  1.00 24.29           N
ATOM   3512  C   GLN A 425       1.590  31.793  56.115  1.00 37.25           C
ATOM   3513  O   GLN A 425       1.952  30.693  55.689  1.00 37.57           O
ATOM   3514  N   ASP A 426       0.332  32.054  56.453  1.00 39.31           N
ATOM   3515  CA  ASP A 426      -0.727  31.063  56.309  1.00 41.99           C
ATOM   3516  CB  ASP A 426      -1.886  31.411  57.252  1.00 42.06           C
ATOM   3517  CG  ASP A 426      -3.092  30.517  57.052  1.00 43.67           C
ATOM   3518  OD1 ASP A 426      -4.226  31.010  57.216  1.00 47.09           O
ATOM   3519  OD2 ASP A 426      -3.011  29.321  56.717  1.00 44.87           O
ATOM   3520  C   ASP A 426      -1.188  30.917  54.840  1.00 43.48           C
ATOM   3521  O   ASP A 426      -1.185  29.816  54.286  1.00 44.16           O
ATOM   3522  N   LYS A 427      -1.525  32.025  54.195  1.00 45.46           N
ATOM   3523  CA  LYS A 427      -2.299  31.977  52.943  1.00 47.35           C
ATOM   3524  CB  LYS A 427      -3.278  33.167  52.878  1.00 47.54           C
ATOM   3525  CG  LYS A 427      -4.422  33.114  53.905  1.00 48.59           C
ATOM   3526  CD  LYS A 427      -5.317  31.894  53.708  1.00 50.25           C
ATOM   3527  CE  LYS A 427      -6.380  31.790  54.793  1.00 51.59           C
ATOM   3528  NZ  LYS A 427      -7.228  30.563  54.615  1.00 51.67           N
ATOM   3529  C   LYS A 427      -1.511  31.849  51.625  1.00 48.15           C
ATOM   3530  O   LYS A 427      -2.074  31.465  50.592  1.00 48.20           O
ATOM   3531  N   TYR A 428      -0.224  32.180  51.654  1.00 49.15           N
ATOM   3532  CA  TYR A 428       0.569  32.267  50.420  1.00 49.85           C
ATOM   3533  CB  TYR A 428       1.763  33.217  50.597  1.00 49.79           C
ATOM   3534  CG  TYR A 428       2.741  33.142  49.446  1.00 49.50           C
ATOM   3535  CD1 TYR A 428       2.599  33.972  48.330  1.00 50.77           C
ATOM   3536  CE1 TYR A 428       3.498  33.896  47.256  1.00 50.95           C
ATOM   3537  CZ  TYR A 428       4.536  32.973  47.301  1.00 50.37           C
ATOM   3538  OH  TYR A 428       5.423  32.904  46.254  1.00 49.53           O
ATOM   3539  CE2 TYR A 428       4.688  32.127  48.392  1.00 49.10           C
ATOM   3540  CD2 TYR A 428       3.792  32.214  49.456  1.00 50.16           C
ATOM   3541  C   TYR A 428       1.060  30.922  49.891  1.00 50.38           C
ATOM   3542  O   TYR A 428       1.437  30.040  50.667  1.00 50.59           O
ATOM   3543  N   GLY A 429       1.073  30.792  48.564  1.00 51.04           N
ATOM   3544  CA  GLY A 429       1.743  29.674  47.899  1.00 51.95           C
ATOM   3545  C   GLY A 429       0.822  28.603  47.340  1.00 52.49           C
ATOM   3546  O   GLY A 429       1.277  27.593  46.785  1.00 51.72           O
ATOM   3547  N   SER A 430      -0.477  28.827  47.502  1.00 53.21           N
ATOM   3548  CA  SER A 430      -1.501  27.933  46.966  1.00 54.23           C
ATOM   3549  CB  SER A 430      -2.159  27.130  48.100  1.00 54.18           C
ATOM   3550  OG  SER A 430      -3.325  26.460  47.654  1.00 54.23           O
ATOM   3551  C   SER A 430      -2.539  28.771  46.232  1.00 54.84           C
ATOM   3552  O   SER A 430      -3.082  29.721  46.803  1.00 54.48           O
ATOM   3553  N   HIS A 431      -2.799  28.424  44.970  1.00 55.81           N
ATOM   3554  CA  HIS A 431      -3.862  29.071  44.197  1.00 57.21           C
ATOM   3555  CB  HIS A 431      -3.958  28.490  42.786  1.00 57.17           C
ATOM   3556  CG  HIS A 431      -4.895  29.243  41.893  1.00 57.86           C
ATOM   3557  ND1 HIS A 431      -4.845  30.615  41.752  1.00 57.75           N
ATOM   3558  CE1 HIS A 431      -5.787  31.004  40.911  1.00 58.01           C
ATOM   3559  NE2 HIS A 431      -6.442  29.934  40.496  1.00 58.51           N
ATOM   3560  CD2 HIS A 431      -5.906  28.819  41.097  1.00 58.32           C
ATOM   3561  C   HIS A 431      -5.231  28.992  44.894  1.00 58.09           C
ATOM   3562  O   HIS A 431      -6.092  29.866  44.698  1.00 58.59           O
ATOM   3563  N   LYS A 432      -5.421  27.951  45.705  1.00 58.97           N
ATOM   3564  CA  LYS A 432      -6.628  27.806  46.529  1.00 60.08           C
ATOM   3565  CB  LYS A 432      -6.583  26.495  47.319  1.00 60.04           C
ATOM   3566  CG  LYS A 432      -6.573  25.230  46.481  1.00 60.61           C
ATOM   3567  CD  LYS A 432      -6.191  24.036  47.347  1.00 61.11           C
ATOM   3568  CE  LYS A 432      -6.501  22.712  46.666  1.00 61.21           C
ATOM   3569  NZ  LYS A 432      -5.899  21.576  47.411  1.00 60.51           N
ATOM   3570  C   LYS A 432      -6.812  28.981  47.504  1.00 60.59           C
ATOM   3571  O   LYS A 432      -7.919  29.506  47.653  1.00 60.59           O
ATOM   3572  N   THR A 433      -5.721  29.393  48.149  1.00 61.29           N
ATOM   3573  CA  THR A 433      -5.793  30.359  49.246  1.00 61.91           C
ATOM   3574  CB  THR A 433      -5.064  29.817  50.513  1.00 61.99           C
ATOM   3575  OG1 THR A 433      -3.728  29.419  50.181  1.00 61.52           O
ATOM   3576  CG2 THR A 433      -5.712  28.526  51.015  1.00 62.04           C
ATOM   3577  C   THR A 433      -5.271  31.751  48.899  1.00 62.53           C
ATOM   3578  O   THR A 433      -5.471  32.691  49.676  1.00 62.50           O
ATOM   3579  N   GLU A 434      -4.622  31.884  47.739  1.00 63.16           N
ATOM   3580  CA  GLU A 434      -3.866  33.102  47.395  1.00 63.96           C
ATOM   3581  CB  GLU A 434      -2.921  32.865  46.201  1.00 63.84           C
ATOM   3582  CG  GLU A 434      -3.574  32.747  44.824  1.00 63.90           C
ATOM   3583  CD  GLU A 434      -2.552  32.606  43.697  1.00 63.80           C
ATOM   3584  OE1 GLU A 434      -1.395  33.043  43.879  1.00 64.01           O
ATOM   3585  OE2 GLU A 434      -2.897  32.063  42.625  1.00 62.39           O
ATOM   3586  C   GLU A 434      -4.706  34.369  47.192  1.00 64.59           C
ATOM   3587  O   GLU A 434      -4.217  35.482  47.424  1.00 64.37           O
ATOM   3588  N   THR A 435      -5.955  34.189  46.758  1.00 65.61           N
ATOM   3589  CA  THR A 435      -6.920  35.292  46.610  1.00 66.72           C
ATOM   3590  CB  THR A 435      -8.222  34.802  45.900  1.00 66.75           C
ATOM   3591  OG1 THR A 435      -8.756  33.662  46.590  1.00 66.35           O
ATOM   3592  CG2 THR A 435      -7.917  34.267  44.497  1.00 66.48           C
ATOM   3593  C   THR A 435      -7.254  35.958  47.960  1.00 67.48           C
ATOM   3594  O   THR A 435      -7.656  37.125  48.000  1.00 67.74           O
ATOM   3595  N   ALA A 436      -7.066  35.205  49.049  1.00 68.33           N
ATOM   3596  CA  ALA A 436      -7.286  35.675  50.420  1.00 68.99           C
ATOM   3597  CB  ALA A 436      -7.437  34.481  51.373  1.00 68.99           C
ATOM   3598  C   ALA A 436      -6.191  36.621  50.928  1.00 69.48           C
ATOM   3599  O   ALA A 436      -6.431  37.415  51.847  1.00 69.61           O
ATOM   3600  N   LEU A 437      -4.993  36.520  50.346  1.00 69.85           N
ATOM   3601  CA  LEU A 437      -3.866  37.400  50.694  1.00 70.10           C
ATOM   3602  CB  LEU A 437      -2.581  36.922  50.027  1.00 70.31           C
ATOM   3603  CG  LEU A 437      -1.911  35.676  50.604  1.00 71.03           C
ATOM   3604  CD1 LEU A 437      -1.301  34.866  49.480  1.00 71.48           C
ATOM   3605  CD2 LEU A 437      -0.870  36.035  51.667  1.00 71.68           C
ATOM   3606  C   LEU A 437      -4.145  38.850  50.311  1.00 70.02           C
ATOM   3607  O   LEU A 437      -3.840  39.767  51.073  1.00 70.31           O
ATOM   3608  N   ASN A 438      -4.713  39.043  49.122  1.00 69.83           N
ATOM   3609  CA  ASN A 438      -5.306  40.323  48.727  1.00 69.54           C
ATOM   3610  CB  ASN A 438      -5.590  40.331  47.221  1.00 69.58           C
ATOM   3611  CG  ASN A 438      -4.379  39.903  46.392  1.00 70.29           C
ATOM   3612  OD1 ASN A 438      -3.716  38.901  46.695  1.00 70.10           O
ATOM   3613  ND2 ASN A 438      -4.087  40.664  45.342  1.00 70.72           N
ATOM   3614  C   ASN A 438      -6.593  40.518  49.548  1.00 68.93           C
ATOM   3615  O   ASN A 438      -7.300  39.535  49.790  1.00 68.83           O
ATOM   3616  N   ALA A 439      -6.933  41.739  49.983  1.00 68.17           N
ATOM   3617  CA  ALA A 439      -6.383  43.041  49.545  1.00 67.27           C
ATOM   3618  CB  ALA A 439      -7.231  44.179  50.158  1.00 67.54           C
ATOM   3619  C   ALA A 439      -4.884  43.356  49.737  1.00 66.48           C
ATOM   3620  O   ALA A 439      -4.320  44.130  48.953  1.00 66.95           O
ATOM   3621  N   LEU A 440      -4.254  42.775  50.759  1.00 64.78           N
ATOM   3622  CA  LEU A 440      -2.908  43.179  51.211  1.00 62.87           C
ATOM   3623  CB  LEU A 440      -2.437  42.242  52.338  1.00 63.07           C
ATOM   3624  CG  LEU A 440      -3.033  42.299  53.755  1.00 63.29           C
ATOM   3625  CD1 LEU A 440      -4.461  41.768  53.819  1.00 64.47           C
ATOM   3626  CD2 LEU A 440      -2.151  41.517  54.726  1.00 62.95           C
ATOM   3627  C   LEU A 440      -1.782  43.342  50.144  1.00 61.53           C
ATOM   3628  O   LEU A 440      -0.811  44.070  50.382  1.00 60.65           O
ATOM   3629  N   LYS A 441      -1.917  42.690  48.983  1.00 59.75           N
ATOM   3630  CA  LYS A 441      -0.813  42.582  48.007  1.00 58.55           C
ATOM   3631  CB  LYS A 441      -1.105  41.463  46.995  1.00 58.51           C
ATOM   3632  CG  LYS A 441       0.083  41.078  46.107  1.00 58.75           C
ATOM   3633  CD  LYS A 441      -0.325  40.050  45.071  1.00 59.48           C
ATOM   3634  CE  LYS A 441      -0.960  40.690  43.848  1.00 61.29           C
ATOM   3635  NZ  LYS A 441      -1.512  39.658  42.901  1.00 63.37           N
ATOM   3636  C   LYS A 441      -0.431  43.875  47.262  1.00 57.25           C
ATOM   3637  O   LYS A 441      -1.299  44.651  46.881  1.00 56.87           O
ATOM   3638  N   LEU A 442       0.874  44.075  47.059  1.00 56.37           N
ATOM   3639  CA ALEU A 442       1.393  45.220  46.300  0.50 56.15           C
ATOM   3640  CA BLEU A 442       1.382  45.214  46.293  0.50 56.02           C
ATOM   3641  CB ALEU A 442       2.767  45.663  46.826  0.50 56.00           C
ATOM   3642  CB BLEU A 442       2.760  45.646  46.780  0.50 55.77           C
ATOM   3643  CG ALEU A 442       3.489  46.833  46.131  0.50 55.97           C
ATOM   3644  CG BLEU A 442       3.084  45.935  48.238  0.50 55.17           C
ATOM   3645  CD1ALEU A 442       4.416  47.514  47.094  0.50 56.60           C
ATOM   3646  CD1BLEU A 442       4.150  46.974  48.192  0.50 55.61           C
ATOM   3647  CD2ALEU A 442       4.263  46.429  44.876  0.50 56.51           C
ATOM   3648  CD2BLEU A 442       1.898  46.440  49.019  0.50 55.19           C
ATOM   3649  C   LEU A 442       1.492  44.884  44.817  1.00 56.10           C
ATOM   3650  O   LEU A 442       2.093  43.871  44.440  1.00 55.47           O
ATOM   3651  N   VAL A 443       0.926  45.758  43.990  1.00 56.17           N
ATOM   3652  CA  VAL A 443       0.927  45.589  42.535  1.00 56.63           C
ATOM   3653  CB  VAL A 443      -0.506  45.340  41.994  1.00 56.62           C
ATOM   3654  CG1 VAL A 443      -1.197  44.207  42.749  1.00 56.02           C
ATOM   3655  CG2 VAL A 443      -1.332  46.574  42.118  1.00 56.10           C
ATOM   3656  C   VAL A 443       1.548  46.816  41.851  1.00 57.35           C
ATOM   3657  O   VAL A 443       1.810  47.834  42.492  1.00 56.73           O
ATOM   3658  N   THR A 444       1.795  46.714  40.550  1.00 58.12           N
ATOM   3659  CA  THR A 444       2.317  47.855  39.798  1.00 59.12           C
ATOM   3660  CB  THR A 444       3.140  47.393  38.568  1.00 59.15           C
ATOM   3661  OG1 THR A 444       2.409  46.392  37.851  1.00 60.09           O
ATOM   3662  CG2 THR A 444       4.408  46.656  38.998  1.00 59.03           C
ATOM   3663  C   THR A 444       1.164  48.770  39.380  1.00 59.36           C
ATOM   3664  O   THR A 444       1.315  49.991  39.328  1.00 59.40           O
ATOM   3665  N   ALA A 445       0.016  48.159  39.097  1.00 59.98           N
ATOM   3666  CA  ALA A 445      -1.174  48.865  38.624  1.00 60.38           C
ATOM   3667  CB  ALA A 445      -1.671  48.259  37.297  1.00 60.42           C
ATOM   3668  C   ALA A 445      -2.253  48.796  39.699  1.00 60.49           C
ATOM   3669  O   ALA A 445      -2.872  47.744  39.904  1.00 60.69           O
ATOM   3670  N   ALA A 446      -2.495  49.939  40.343  1.00 60.57           N
ATOM   3671  CA  ALA A 446      -3.117  50.020  41.674  1.00 60.33           C
ATOM   3672  CB  ALA A 446      -4.229  48.950  41.874  1.00 60.50           C
ATOM   3673  C   ALA A 446      -1.953  49.915  42.689  1.00 59.83           C
ATOM   3674  O   ALA A 446      -0.824  50.223  42.295  1.00 60.21           O
ATOM   3675  N   PRO A 447      -2.152  49.455  43.934  1.00 58.94           N
ATOM   3676  CA  PRO A 447      -1.206  49.723  44.989  1.00 58.28           C
ATOM   3677  CB  PRO A 447      -0.829  48.303  45.421  1.00 57.70           C
ATOM   3678  CG  PRO A 447      -2.191  47.585  45.326  1.00 57.78           C
ATOM   3679  CD  PRO A 447      -3.141  48.491  44.451  1.00 59.16           C
ATOM   3680  C   PRO A 447       0.005  50.611  44.650  1.00 57.62           C
ATOM   3681  O   PRO A 447      -0.064  51.810  44.885  1.00 57.35           O
ATOM   3682  N   ASP A 448       1.072  50.027  44.103  1.00 57.02           N
ATOM   3683  CA  ASP A 448       2.383  50.675  43.909  1.00 56.63           C
ATOM   3684  CB  ASP A 448       2.791  50.629  42.433  1.00 57.41           C
ATOM   3685  CG  ASP A 448       4.284  50.448  42.247  1.00 59.20           C
ATOM   3686  OD1 ASP A 448       5.062  50.882  43.132  1.00 61.48           O
ATOM   3687  OD2 ASP A 448       4.775  49.879  41.244  1.00 62.00           O
ATOM   3688  C   ASP A 448       2.595  52.097  44.463  1.00 55.81           C
ATOM   3689  O   ASP A 448       3.338  52.282  45.439  1.00 55.35           O
ATOM   3690  N   GLU A 449       1.954  53.086  43.834  1.00 54.70           N
ATOM   3691  CA  GLU A 449       2.248  54.509  44.099  1.00 54.01           C
ATOM   3692  CB  GLU A 449       2.396  55.301  42.783  1.00 54.38           C
ATOM   3693  CG  GLU A 449       3.292  54.665  41.725  1.00 56.21           C
ATOM   3694  CD  GLU A 449       4.780  54.719  42.060  1.00 59.33           C
ATOM   3695  OE1 GLU A 449       5.151  55.034  43.222  1.00 60.51           O
ATOM   3696  OE2 GLU A 449       5.592  54.432  41.145  1.00 61.04           O
ATOM   3697  C   GLU A 449       1.235  55.210  45.002  1.00 52.50           C
ATOM   3698  O   GLU A 449       1.425  56.376  45.346  1.00 52.51           O
ATOM   3699  N   GLU A 450       0.156  54.508  45.360  1.00 50.88           N
ATOM   3700  CA  GLU A 450      -0.840  55.030  46.295  1.00 49.55           C
ATOM   3701  CB  GLU A 450      -2.016  54.062  46.443  1.00 49.61           C
ATOM   3702  CG  GLU A 450      -2.803  53.774  45.165  1.00 50.11           C
ATOM   3703  CD  GLU A 450      -3.968  52.817  45.399  1.00 50.87           C
ATOM   3704  OE1 GLU A 450      -4.346  52.600  46.579  1.00 52.92           O
ATOM   3705  OE2 GLU A 450      -4.520  52.275  44.404  1.00 53.51           O
ATOM   3706  C   GLU A 450      -0.166  55.272  47.651  1.00 48.30           C
ATOM   3707  O   GLU A 450       0.621  54.428  48.117  1.00 47.23           O
ATOM   3708  N   GLU A 451      -0.462  56.418  48.272  1.00 46.59           N
ATOM   3709  CA  GLU A 451       0.269  56.847  49.467  1.00 45.52           C
ATOM   3710  CB  GLU A 451      -0.184  58.235  49.977  1.00 46.07           C
ATOM   3711  CG  GLU A 451       0.126  59.408  49.037  1.00 48.65           C
ATOM   3712  CD  GLU A 451       1.591  59.472  48.582  1.00 52.73           C
ATOM   3713  OE1 GLU A 451       2.500  59.659  49.428  1.00 54.03           O
ATOM   3714  OE2 GLU A 451       1.846  59.341  47.361  1.00 55.06           O
ATOM   3715  C   GLU A 451       0.195  55.804  50.570  1.00 43.88           C
ATOM   3716  O   GLU A 451       1.207  55.477  51.186  1.00 43.51           O
ATOM   3717  N   SER A 452      -1.001  55.270  50.792  1.00 42.11           N
ATOM   3718  CA  SER A 452      -1.227  54.286  51.836  1.00 40.81           C
ATOM   3719  CB  SER A 452      -2.710  53.911  51.914  1.00 41.06           C
ATOM   3720  OG  SER A 452      -3.159  53.344  50.692  1.00 43.02           O
ATOM   3721  C   SER A 452      -0.377  53.031  51.651  1.00 39.39           C
ATOM   3722  O   SER A 452       0.162  52.499  52.620  1.00 38.91           O
ATOM   3723  N   ILE A 453      -0.256  52.555  50.416  1.00 37.33           N
ATOM   3724  CA  ILE A 453       0.502  51.323  50.207  1.00 35.68           C
ATOM   3725  CB  ILE A 453       0.019  50.519  48.955  1.00 36.14           C
ATOM   3726  CG1 ILE A 453       0.849  50.842  47.734  1.00 38.05           C
ATOM   3727  CD1 ILE A 453       1.998  49.902  47.588  1.00 40.37           C
ATOM   3728  CG2 ILE A 453      -1.457  50.679  48.710  1.00 35.59           C
ATOM   3729  C   ILE A 453       2.014  51.613  50.232  1.00 33.71           C
ATOM   3730  O   ILE A 453       2.794  50.829  50.789  1.00 33.83           O
ATOM   3731  N   LYS A 454       2.412  52.764  49.691  1.00 31.69           N
ATOM   3732  CA ALYS A 454       3.824  53.116  49.723  0.50 30.35           C
ATOM   3733  CA BLYS A 454       3.793  53.241  49.716  0.50 30.47           C
ATOM   3734  CB ALYS A 454       4.181  54.314  48.844  0.50 30.43           C
ATOM   3735  CB BLYS A 454       3.828  54.639  49.107  0.50 30.44           C
ATOM   3736  CG ALYS A 454       3.326  55.553  49.003  0.50 30.72           C
ATOM   3737  CG BLYS A 454       5.195  55.292  49.026  0.50 31.44           C
ATOM   3738  CD ALYS A 454       3.915  56.773  48.285  0.50 31.20           C
ATOM   3739  CD BLYS A 454       5.109  56.625  48.282  0.50 31.88           C
ATOM   3740  CE ALYS A 454       4.367  56.462  46.858  0.50 32.64           C
ATOM   3741  CE BLYS A 454       6.485  57.187  47.959  0.50 33.95           C
ATOM   3742  NZ ALYS A 454       4.375  57.678  45.987  0.50 33.23           N
ATOM   3743  NZ BLYS A 454       7.188  56.343  46.943  0.50 35.60           N
ATOM   3744  C   LYS A 454       4.317  53.292  51.160  1.00 29.28           C
ATOM   3745  O   LYS A 454       5.417  52.857  51.473  1.00 27.92           O
ATOM   3746  N   ASP A 455       3.480  53.862  52.022  1.00 27.41           N
ATOM   3747  CA  ASP A 455       3.848  54.134  53.398  1.00 26.38           C
ATOM   3748  CB  ASP A 455       2.987  55.288  53.932  1.00 26.14           C
ATOM   3749  CG  ASP A 455       3.443  56.640  53.409  1.00 27.12           C
ATOM   3750  OD1 ASP A 455       4.663  56.823  53.115  1.00 24.94           O
ATOM   3751  OD2 ASP A 455       2.641  57.596  53.303  1.00 28.68           O
ATOM   3752  C   ASP A 455       3.749  52.928  54.339  1.00 25.77           C
ATOM   3753  O   ASP A 455       4.380  52.933  55.391  1.00 25.21           O
ATOM   3754  N   ALA A 456       2.976  51.914  53.958  1.00 24.95           N
ATOM   3755  CA  ALA A 456       2.730  50.761  54.843  1.00 24.57           C
ATOM   3756  CB  ALA A 456       1.690  49.839  54.219  1.00 25.68           C
ATOM   3757  C   ALA A 456       3.998  49.973  55.158  1.00 24.26           C
ATOM   3758  O   ALA A 456       4.871  49.844  54.281  1.00 24.79           O
ATOM   3759  N   PRO A 457       4.111  49.425  56.376  1.00 22.90           N
ATOM   3760  CA  PRO A 457       5.156  48.442  56.627  1.00 22.63           C
ATOM   3761  CB  PRO A 457       4.908  48.007  58.078  1.00 23.06           C
ATOM   3762  CG  PRO A 457       4.046  49.069  58.664  1.00 22.14           C
ATOM   3763  CD  PRO A 457       3.222  49.602  57.538  1.00 23.08           C
ATOM   3764  C   PRO A 457       4.889  47.311  55.629  1.00 22.63           C
ATOM   3765  O   PRO A 457       3.722  47.053  55.301  1.00 22.50           O
ATOM   3766  N   LYS A 458       5.947  46.690  55.106  1.00 22.48           N
ATOM   3767  CA  LYS A 458       5.809  45.563  54.162  1.00 22.33           C
ATOM   3768  CB  LYS A 458       6.624  45.832  52.872  1.00 22.26           C
ATOM   3769  CG  LYS A 458       6.302  47.159  52.151  1.00 22.14           C
ATOM   3770  CD  LYS A 458       4.831  47.240  51.828  1.00 23.42           C
ATOM   3771  CE  LYS A 458       4.507  48.445  50.923  1.00 23.12           C
ATOM   3772  NZ  LYS A 458       5.062  49.722  51.457  1.00 26.81           N
ATOM   3773  C   LYS A 458       6.233  44.206  54.744  1.00 21.94           C
ATOM   3774  O   LYS A 458       7.090  44.142  55.625  1.00 22.31           O
ATOM   3775  N   ALA A 459       5.610  43.136  54.259  1.00 23.07           N
ATOM   3776  CA  ALA A 459       6.171  41.780  54.410  1.00 22.79           C
ATOM   3777  CB  ALA A 459       5.154  40.816  54.968  1.00 23.55           C
ATOM   3778  C   ALA A 459       6.608  41.364  53.003  1.00 23.50           C
ATOM   3779  O   ALA A 459       5.829  41.500  52.039  1.00 23.84           O
ATOM   3780  N   TYR A 460       7.859  40.920  52.872  1.00 22.59           N
ATOM   3781  CA  TYR A 460       8.416  40.560  51.563  1.00 22.76           C
ATOM   3782  CB  TYR A 460       9.817  41.129  51.431  1.00 23.27           C
ATOM   3783  CG  TYR A 460       9.874  42.633  51.431  1.00 25.09           C
ATOM   3784  CD1 TYR A 460      10.242  43.334  52.586  1.00 26.36           C
ATOM   3785  CE1 TYR A 460      10.339  44.741  52.582  1.00 26.85           C
ATOM   3786  CZ  TYR A 460      10.049  45.436  51.408  1.00 27.85           C
ATOM   3787  OH  TYR A 460      10.124  46.812  51.399  1.00 27.55           O
ATOM   3788  CE2 TYR A 460       9.700  44.757  50.251  1.00 29.71           C
ATOM   3789  CD2 TYR A 460       9.629  43.351  50.266  1.00 26.09           C
ATOM   3790  C   TYR A 460       8.525  39.041  51.448  1.00 22.58           C
ATOM   3791  O   TYR A 460       8.816  38.391  52.437  1.00 22.47           O
ATOM   3792  N   LEU A 461       8.305  38.515  50.241  1.00 23.49           N
ATOM   3793  CA  LEU A 461       8.392  37.072  49.955  1.00 23.67           C
ATOM   3794  CB  LEU A 461       7.013  36.465  49.691  1.00 24.59           C
ATOM   3795  CG  LEU A 461       6.086  36.181  50.885  1.00 25.81           C
ATOM   3796  CD1 LEU A 461       5.600  37.476  51.533  1.00 28.34           C
ATOM   3797  CD2 LEU A 461       4.919  35.415  50.373  1.00 26.10           C
ATOM   3798  C   LEU A 461       9.265  36.853  48.734  1.00 24.27           C
ATOM   3799  O   LEU A 461       9.128  37.582  47.741  1.00 24.00           O
ATOM   3800  N   SER A 462      10.171  35.871  48.833  1.00 23.96           N
ATOM   3801  CA  SER A 462      10.901  35.369  47.668  1.00 23.85           C
ATOM   3802  CB  SER A 462      12.405  35.582  47.786  1.00 23.11           C
ATOM   3803  OG  SER A 462      12.776  36.962  47.772  1.00 25.58           O
ATOM   3804  C   SER A 462      10.637  33.877  47.665  1.00 24.09           C
ATOM   3805  O   SER A 462      10.982  33.207  48.648  1.00 22.28           O
ATOM   3806  N   THR A 463      10.065  33.389  46.560  1.00 24.09           N
ATOM   3807  CA  THR A 463       9.695  31.976  46.412  1.00 24.84           C
ATOM   3808  CB  THR A 463       8.183  31.868  46.214  1.00 25.12           C
ATOM   3809  OG1 THR A 463       7.548  32.337  47.401  1.00 27.34           O
ATOM   3810  CG2 THR A 463       7.716  30.391  46.132  1.00 25.47           C
ATOM   3811  C   THR A 463      10.451  31.302  45.268  1.00 25.14           C
ATOM   3812  O   THR A 463      10.522  31.849  44.162  1.00 25.62           O
ATOM   3813  N   MET A 464      11.059  30.155  45.584  1.00 24.98           N
ATOM   3814  CA AMET A 464      11.788  29.317  44.625  0.50 24.61           C
ATOM   3815  CA BMET A 464      11.718  29.345  44.574  0.50 24.97           C
ATOM   3816  CB AMET A 464      13.201  29.019  45.120  0.50 24.64           C
ATOM   3817  CB BMET A 464      13.183  29.197  44.902  0.50 24.77           C
ATOM   3818  CG AMET A 464      14.250  30.109  44.831  0.50 25.90           C
ATOM   3819  CG BMET A 464      13.933  30.513  44.740  0.50 24.71           C
ATOM   3820  SD AMET A 464      14.056  31.581  45.835  0.50 27.46           S
ATOM   3821  SD BMET A 464      15.010  30.749  46.132  0.50 27.10           S
ATOM   3822  CE AMET A 464      14.301  30.916  47.497  0.50 26.15           C
ATOM   3823  CE BMET A 464      13.854  31.342  47.390  0.50 24.86           C
ATOM   3824  C   MET A 464      11.051  27.992  44.460  1.00 24.67           C
ATOM   3825  O   MET A 464      10.439  27.514  45.421  1.00 24.03           O
ATOM   3826  N   TYR A 465      11.160  27.393  43.274  1.00 23.57           N
ATOM   3827  CA  TYR A 465      10.473  26.141  42.983  1.00 23.48           C
ATOM   3828  CB  TYR A 465       9.440  26.349  41.859  1.00 24.17           C
ATOM   3829  CG  TYR A 465       8.279  27.211  42.267  1.00 24.99           C
ATOM   3830  CD1 TYR A 465       8.343  28.603  42.151  1.00 23.38           C
ATOM   3831  CE1 TYR A 465       7.258  29.410  42.545  1.00 26.16           C
ATOM   3832  CZ  TYR A 465       6.107  28.816  43.061  1.00 27.32           C
ATOM   3833  OH  TYR A 465       5.042  29.609  43.461  1.00 28.34           O
ATOM   3834  CE2 TYR A 465       6.022  27.435  43.192  1.00 25.94           C
ATOM   3835  CD2 TYR A 465       7.115  26.638  42.808  1.00 27.33           C
ATOM   3836  C   TYR A 465      11.469  25.060  42.576  1.00 23.40           C
ATOM   3837  O   TYR A 465      12.416  25.341  41.845  1.00 22.83           O
ATOM   3838  N   ILE A 466      11.269  23.849  43.091  1.00 22.05           N
ATOM   3839  CA  ILE A 466      11.955  22.647  42.588  1.00 21.50           C
ATOM   3840  CB  ILE A 466      12.772  21.931  43.686  1.00 20.51           C
ATOM   3841  CG1 ILE A 466      13.830  22.866  44.301  1.00 19.23           C
ATOM   3842  CD1 ILE A 466      14.511  22.373  45.535  1.00 19.16           C
ATOM   3843  CG2 ILE A 466      13.395  20.598  43.151  1.00 21.21           C
ATOM   3844  C   ILE A 466      10.892  21.723  41.998  1.00 22.33           C
ATOM   3845  O   ILE A 466       9.947  21.336  42.693  1.00 22.49           O
ATOM   3846  N   GLY A 467      11.028  21.407  40.712  1.00 23.02           N
ATOM   3847  CA  GLY A 467      10.152  20.437  40.037  1.00 23.23           C
ATOM   3848  C   GLY A 467      10.515  19.030  40.477  1.00 24.71           C
ATOM   3849  O   GLY A 467      11.702  18.655  40.554  1.00 22.58           O
ATOM   3850  N   LEU A 468       9.497  18.224  40.787  1.00 24.88           N
ATOM   3851  CA  LEU A 468       9.766  16.863  41.256  1.00 26.76           C
ATOM   3852  CB  LEU A 468       9.308  16.679  42.716  1.00 26.88           C
ATOM   3853  CG  LEU A 468       9.988  17.512  43.798  1.00 26.62           C
ATOM   3854  CD1 LEU A 468       9.245  17.332  45.151  1.00 28.33           C
ATOM   3855  CD2 LEU A 468      11.412  17.101  43.965  1.00 26.16           C
ATOM   3856  C   LEU A 468       9.142  15.799  40.360  1.00 27.83           C
ATOM   3857  O   LEU A 468       8.013  15.933  39.929  1.00 27.57           O
ATOM   3858  N   ASP A 469       9.938  14.778  40.045  1.00 29.95           N
ATOM   3859  CA  ASP A 469       9.501  13.591  39.291  1.00 32.42           C
ATOM   3860  CB  ASP A 469      10.192  13.559  37.924  1.00 32.95           C
ATOM   3861  CG  ASP A 469       9.583  12.543  36.955  1.00 36.93           C
ATOM   3862  OD1 ASP A 469       8.501  11.979  37.233  1.00 39.23           O
ATOM   3863  OD2 ASP A 469      10.128  12.273  35.866  1.00 39.62           O
ATOM   3864  C   ASP A 469       9.943  12.420  40.164  1.00 33.12           C
ATOM   3865  O   ASP A 469      11.093  12.367  40.609  1.00 32.68           O
ATOM   3866  N   PHE A 470       9.013  11.510  40.451  1.00 34.72           N
ATOM   3867  CA  PHE A 470       9.269  10.392  41.361  1.00 36.54           C
ATOM   3868  CB  PHE A 470       8.151  10.277  42.400  1.00 35.63           C
ATOM   3869  CG  PHE A 470       8.082  11.440  43.353  1.00 33.25           C
ATOM   3870  CD1 PHE A 470       7.217  12.502  43.116  1.00 33.45           C
ATOM   3871  CE1 PHE A 470       7.138  13.585  44.016  1.00 31.51           C
ATOM   3872  CZ  PHE A 470       7.952  13.606  45.134  1.00 32.27           C
ATOM   3873  CE2 PHE A 470       8.818  12.548  45.380  1.00 32.32           C
ATOM   3874  CD2 PHE A 470       8.886  11.475  44.480  1.00 32.53           C
ATOM   3875  C   PHE A 470       9.397   9.072  40.609  1.00 38.91           C
ATOM   3876  O   PHE A 470       8.746   8.877  39.594  1.00 38.93           O
ATOM   3877  N   ASN A 471      10.265   8.198  41.111  1.00 42.17           N
ATOM   3878  CA  ASN A 471      10.459   6.860  40.553  1.00 45.49           C
ATOM   3879  CB  ASN A 471      11.694   6.218  41.167  1.00 45.27           C
ATOM   3880  CG  ASN A 471      12.963   6.683  40.527  1.00 45.49           C
ATOM   3881  OD1 ASN A 471      13.026   6.849  39.315  1.00 46.95           O
ATOM   3882  ND2 ASN A 471      13.997   6.877  41.335  1.00 47.19           N
ATOM   3883  C   ASN A 471       9.264   5.965  40.862  1.00 47.85           C
ATOM   3884  O   ASN A 471       8.991   5.751  42.041  1.00 48.26           O
ATOM   3885  N   ALA A 472       8.536   5.447  39.860  1.00 50.90           N
ATOM   3886  CA  ALA A 472       8.651   5.744  38.412  1.00 53.48           C
ATOM   3887  CB  ALA A 472      10.087   5.476  37.881  1.00 53.33           C
ATOM   3888  C   ALA A 472       7.617   5.016  37.505  1.00 55.34           C
ATOM   3889  O   ALA A 472       7.848   4.912  36.296  1.00 56.00           O
ATOM   3890  N   ALA A 473       6.500   4.491  38.025  1.00 57.45           N
ATOM   3891  CA  ALA A 473       6.118   4.454  39.435  1.00 59.04           C
ATOM   3892  CB  ALA A 473       4.634   4.816  39.571  1.00 59.10           C
ATOM   3893  C   ALA A 473       6.377   3.029  39.962  1.00 60.05           C
ATOM   3894  O   ALA A 473       6.256   2.074  39.193  1.00 60.46           O
ATOM   3895  N   ASN A 474       6.735   2.841  41.236  1.00 61.06           N
ATOM   3896  CA  ASN A 474       6.971   3.856  42.274  1.00 61.75           C
ATOM   3897  CB  ASN A 474       5.712   4.690  42.573  1.00 61.96           C
ATOM   3898  CG  ASN A 474       6.032   6.135  42.951  1.00 62.63           C
ATOM   3899  OD1 ASN A 474       6.653   6.402  43.983  1.00 62.41           O
ATOM   3900  ND2 ASN A 474       5.587   7.078  42.117  1.00 63.36           N
ATOM   3901  C   ASN A 474       7.524   3.213  43.575  1.00 62.01           C
ATOM   3902  O   ASN A 474       8.296   3.862  44.294  1.00 62.20           O
ATOM   3903  N   ALA A 475       7.166   1.957  43.888  1.00 62.07           N
ATOM   3904  CA  ALA A 475       6.328   1.075  43.046  1.00 62.00           C
ATOM   3905  CB  ALA A 475       6.591  -0.406  43.364  1.00 61.92           C
ATOM   3906  C   ALA A 475       4.818   1.400  43.077  1.00 61.78           C
ATOM   3907  O   ALA A 475       4.111   1.157  42.092  1.00 61.94           O
ATOM   3908  N   ALA A 476       4.345   1.980  44.183  1.00 61.32           N
ATOM   3909  CA  ALA A 476       2.935   2.384  44.302  1.00 60.61           C
ATOM   3910  CB  ALA A 476       2.102   1.238  44.925  1.00 60.67           C
ATOM   3911  C   ALA A 476       2.670   3.719  45.042  1.00 59.90           C
ATOM   3912  O   ALA A 476       1.800   4.502  44.620  1.00 60.23           O
ATOM   3913  N   ALA A 477       3.431   3.978  46.113  1.00 58.45           N
ATOM   3914  CA  ALA A 477       3.048   4.942  47.169  1.00 56.74           C
ATOM   3915  CB  ALA A 477       3.349   4.327  48.557  1.00 57.00           C
ATOM   3916  C   ALA A 477       3.621   6.382  47.080  1.00 55.45           C
ATOM   3917  O   ALA A 477       3.906   6.889  45.983  1.00 55.58           O
ATOM   3918  N   LYS A 478       3.748   7.031  48.247  1.00 53.10           N
ATOM   3919  CA  LYS A 478       4.328   8.376  48.375  1.00 50.59           C
ATOM   3920  CB  LYS A 478       3.491   9.267  49.305  1.00 50.88           C
ATOM   3921  CG  LYS A 478       2.201   9.795  48.688  1.00 51.00           C
ATOM   3922  CD  LYS A 478       1.501  10.786  49.609  1.00 50.88           C
ATOM   3923  CE  LYS A 478       0.184  11.246  48.993  1.00 52.55           C
ATOM   3924  NZ  LYS A 478      -0.764  11.797  50.014  1.00 52.90           N
ATOM   3925  C   LYS A 478       5.756   8.317  48.898  1.00 48.82           C
ATOM   3926  O   LYS A 478       6.071   7.519  49.785  1.00 48.76           O
ATOM   3927  N   VAL A 479       6.611   9.175  48.350  1.00 45.96           N
ATOM   3928  CA  VAL A 479       8.014   9.246  48.752  1.00 43.10           C
ATOM   3929  CB  VAL A 479       8.931   9.611  47.541  1.00 43.01           C
ATOM   3930  CG1 VAL A 479      10.388   9.820  47.973  1.00 42.56           C
ATOM   3931  CG2 VAL A 479       8.849   8.528  46.474  1.00 42.76           C
ATOM   3932  C   VAL A 479       8.151  10.246  49.892  1.00 41.21           C
ATOM   3933  O   VAL A 479       7.661  11.367  49.794  1.00 40.74           O
ATOM   3934  N   ASP A 480       8.792   9.819  50.982  1.00 39.53           N
ATOM   3935  CA  ASP A 480       9.012  10.672  52.141  1.00 37.93           C
ATOM   3936  CB  ASP A 480       9.288   9.809  53.375  1.00 38.11           C
ATOM   3937  CG  ASP A 480       9.494  10.621  54.644  1.00 39.91           C
ATOM   3938  OD1 ASP A 480       9.056  10.145  55.722  1.00 40.61           O
ATOM   3939  OD2 ASP A 480      10.083  11.731  54.686  1.00 40.86           O
ATOM   3940  C   ASP A 480      10.202  11.579  51.849  1.00 36.91           C
ATOM   3941  O   ASP A 480      11.317  11.098  51.688  1.00 35.99           O
ATOM   3942  N   ILE A 481       9.963  12.888  51.781  1.00 35.82           N
ATOM   3943  CA  ILE A 481      11.058  13.832  51.532  1.00 34.60           C
ATOM   3944  CB  ILE A 481      10.748  14.722  50.295  1.00 34.48           C
ATOM   3945  CG1 ILE A 481       9.499  15.589  50.519  1.00 35.41           C
ATOM   3946  CD1 ILE A 481       9.267  16.662  49.439  1.00 35.35           C
ATOM   3947  CG2 ILE A 481      10.631  13.876  49.027  1.00 33.56           C
ATOM   3948  C   ILE A 481      11.443  14.687  52.752  1.00 33.95           C
ATOM   3949  O   ILE A 481      12.113  15.720  52.606  1.00 33.39           O
ATOM   3950  N   HIS A 482      11.041  14.255  53.953  1.00 32.43           N
ATOM   3951  CA  HIS A 482      11.206  15.067  55.152  1.00 31.86           C
ATOM   3952  CB  HIS A 482      10.391  14.524  56.369  1.00 32.12           C
ATOM   3953  CG  HIS A 482      11.121  13.531  57.231  1.00 33.64           C
ATOM   3954  ND1 HIS A 482      11.223  12.193  56.912  1.00 34.92           N
ATOM   3955  CE1 HIS A 482      11.884  11.558  57.865  1.00 35.01           C
ATOM   3956  NE2 HIS A 482      12.208  12.435  58.799  1.00 36.29           N
ATOM   3957  CD2 HIS A 482      11.732  13.673  58.435  1.00 36.00           C
ATOM   3958  C   HIS A 482      12.629  15.329  55.556  1.00 31.19           C
ATOM   3959  O   HIS A 482      12.929  16.415  56.049  1.00 32.01           O
ATOM   3960  N   ILE A 483      13.514  14.356  55.363  1.00 30.92           N
ATOM   3961  CA  ILE A 483      14.874  14.525  55.860  1.00 30.99           C
ATOM   3962  CB  ILE A 483      15.640  13.162  55.936  1.00 30.78           C
ATOM   3963  CG1 ILE A 483      15.015  12.278  57.028  1.00 31.69           C
ATOM   3964  CD1 ILE A 483      15.672  10.873  57.232  1.00 31.88           C
ATOM   3965  CG2 ILE A 483      17.129  13.374  56.207  1.00 32.61           C
ATOM   3966  C   ILE A 483      15.602  15.682  55.109  1.00 30.79           C
ATOM   3967  O   ILE A 483      16.063  16.618  55.768  1.00 30.03           O
ATOM   3968  N   PRO A 484      15.649  15.667  53.766  1.00 30.56           N
ATOM   3969  CA  PRO A 484      16.227  16.808  53.028  1.00 30.38           C
ATOM   3970  CB  PRO A 484      15.995  16.428  51.561  1.00 30.75           C
ATOM   3971  CG  PRO A 484      16.006  14.906  51.591  1.00 30.79           C
ATOM   3972  CD  PRO A 484      15.221  14.591  52.842  1.00 30.46           C
ATOM   3973  C   PRO A 484      15.550  18.152  53.363  1.00 30.34           C
ATOM   3974  O   PRO A 484      16.237  19.149  53.610  1.00 29.58           O
ATOM   3975  N   CYS A 485      14.219  18.162  53.399  1.00 29.51           N
ATOM   3976  CA  CYS A 485      13.473  19.370  53.724  1.00 29.72           C
ATOM   3977  CB  CYS A 485      11.975  19.149  53.551  1.00 29.56           C
ATOM   3978  SG  CYS A 485      11.471  18.966  51.845  1.00 31.52           S
ATOM   3979  C   CYS A 485      13.760  19.925  55.111  1.00 29.33           C
ATOM   3980  O   CYS A 485      13.880  21.158  55.277  1.00 28.81           O
ATOM   3981  N   THR A 486      13.867  19.030  56.109  1.00 28.99           N
ATOM   3982  CA  THR A 486      14.071  19.458  57.492  1.00 28.51           C
ATOM   3983  CB  THR A 486      13.750  18.309  58.510  1.00 27.96           C
ATOM   3984  OG1 THR A 486      12.377  17.932  58.371  1.00 28.47           O
ATOM   3985  CG2 THR A 486      13.867  18.816  59.963  1.00 30.18           C
ATOM   3986  C   THR A 486      15.492  19.967  57.656  1.00 28.14           C
ATOM   3987  O   THR A 486      15.710  21.008  58.292  1.00 27.37           O
ATOM   3988  N   GLU A 487      16.439  19.244  57.048  1.00 28.53           N
ATOM   3989  CA AGLU A 487      17.856  19.633  57.017  0.50 29.03           C
ATOM   3990  CA BGLU A 487      17.825  19.654  57.085  0.50 28.63           C
ATOM   3991  CB AGLU A 487      18.678  18.727  56.090  0.50 29.13           C
ATOM   3992  CB BGLU A 487      18.709  18.628  56.384  0.50 28.77           C
ATOM   3993  CG AGLU A 487      18.844  17.268  56.479  0.50 30.36           C
ATOM   3994  CG BGLU A 487      20.129  19.093  56.180  0.50 29.12           C
ATOM   3995  CD AGLU A 487      19.790  16.547  55.533  0.50 30.03           C
ATOM   3996  CD BGLU A 487      21.157  18.016  56.447  0.50 29.28           C
ATOM   3997  OE1AGLU A 487      19.407  15.515  54.946  0.50 32.66           O
ATOM   3998  OE1BGLU A 487      20.786  16.822  56.563  0.50 32.51           O
ATOM   3999  OE2AGLU A 487      20.925  17.030  55.367  0.50 33.77           O
ATOM   4000  OE2BGLU A 487      22.344  18.380  56.553  0.50 29.25           O
ATOM   4001  C   GLU A 487      17.980  21.049  56.472  1.00 28.70           C
ATOM   4002  O   GLU A 487      18.679  21.891  57.040  1.00 29.06           O
ATOM   4003  N   PHE A 488      17.313  21.286  55.343  1.00 28.35           N
ATOM   4004  CA  PHE A 488      17.326  22.596  54.682  1.00 28.31           C
ATOM   4005  CB  PHE A 488      16.477  22.576  53.415  1.00 27.13           C
ATOM   4006  CG  PHE A 488      16.524  23.875  52.655  1.00 27.04           C
ATOM   4007  CD1 PHE A 488      17.677  24.233  51.949  1.00 24.72           C
ATOM   4008  CE1 PHE A 488      17.744  25.446  51.271  1.00 24.36           C
ATOM   4009  CZ  PHE A 488      16.656  26.315  51.279  1.00 25.85           C
ATOM   4010  CE2 PHE A 488      15.503  25.973  51.986  1.00 28.14           C
ATOM   4011  CD2 PHE A 488      15.446  24.754  52.676  1.00 26.19           C
ATOM   4012  C   PHE A 488      16.804  23.703  55.603  1.00 29.37           C
ATOM   4013  O   PHE A 488      17.451  24.752  55.779  1.00 28.73           O
ATOM   4014  N   VAL A 489      15.627  23.463  56.180  1.00 30.19           N
ATOM   4015  CA  VAL A 489      14.983  24.450  57.070  1.00 32.40           C
ATOM   4016  CB  VAL A 489      13.597  23.935  57.560  1.00 31.68           C
ATOM   4017  CG1 VAL A 489      13.177  24.541  58.904  1.00 33.72           C
ATOM   4018  CG2 VAL A 489      12.560  24.204  56.477  1.00 32.42           C
ATOM   4019  C   VAL A 489      15.944  24.910  58.187  1.00 33.20           C
ATOM   4020  O   VAL A 489      16.193  26.114  58.340  1.00 33.35           O
ATOM   4021  N   ASN A 490      16.508  23.941  58.903  1.00 34.50           N
ATOM   4022  CA  ASN A 490      17.416  24.187  60.011  1.00 36.51           C
ATOM   4023  CB  ASN A 490      17.611  22.908  60.829  1.00 36.97           C
ATOM   4024  CG  ASN A 490      16.318  22.409  61.475  1.00 38.35           C
ATOM   4025  OD1 ASN A 490      16.092  21.198  61.564  1.00 41.46           O
ATOM   4026  ND2 ASN A 490      15.483  23.324  61.935  1.00 38.80           N
ATOM   4027  C   ASN A 490      18.774  24.729  59.589  1.00 37.03           C
ATOM   4028  O   ASN A 490      19.398  25.511  60.325  1.00 37.64           O
ATOM   4029  N   LEU A 491      19.239  24.289  58.424  1.00 37.04           N
ATOM   4030  CA  LEU A 491      20.510  24.755  57.877  1.00 37.48           C
ATOM   4031  CB  LEU A 491      20.853  23.982  56.598  1.00 37.49           C
ATOM   4032  CG  LEU A 491      21.902  24.515  55.620  1.00 39.10           C
ATOM   4033  CD1 LEU A 491      23.274  24.605  56.281  1.00 40.48           C
ATOM   4034  CD2 LEU A 491      21.946  23.647  54.371  1.00 38.36           C
ATOM   4035  C   LEU A 491      20.479  26.268  57.618  1.00 37.29           C
ATOM   4036  O   LEU A 491      21.435  26.970  57.921  1.00 37.47           O
ATOM   4037  N   CYS A 492      19.380  26.762  57.071  1.00 37.75           N
ATOM   4038  CA  CYS A 492      19.251  28.194  56.778  1.00 38.57           C
ATOM   4039  CB  CYS A 492      18.003  28.444  55.956  1.00 37.74           C
ATOM   4040  SG  CYS A 492      18.148  27.818  54.273  1.00 31.42           S
ATOM   4041  C   CYS A 492      19.187  29.062  58.032  1.00 41.21           C
ATOM   4042  O   CYS A 492      19.744  30.158  58.057  1.00 40.75           O
ATOM   4043  N   ARG A 493      18.485  28.556  59.045  1.00 44.32           N
ATOM   4044  CA  ARG A 493      18.224  29.261  60.305  1.00 47.97           C
ATOM   4045  CB  ARG A 493      17.408  28.359  61.243  1.00 48.10           C
ATOM   4046  CG  ARG A 493      15.910  28.631  61.289  1.00 49.57           C
ATOM   4047  CD  ARG A 493      15.199  28.637  59.957  1.00 50.59           C
ATOM   4048  NE  ARG A 493      13.946  29.378  60.035  1.00 51.60           N
ATOM   4049  CZ  ARG A 493      13.852  30.695  60.160  1.00 51.54           C
ATOM   4050  NH1 ARG A 493      14.939  31.460  60.229  1.00 53.74           N
ATOM   4051  NH2 ARG A 493      12.659  31.258  60.221  1.00 52.82           N
ATOM   4052  C   ARG A 493      19.490  29.672  61.031  1.00 49.91           C
ATOM   4053  O   ARG A 493      19.532  30.743  61.665  1.00 50.98           O
ATOM   4054  N   SER A 494      20.510  28.818  60.940  1.00 51.95           N
ATOM   4055  CA  SER A 494      21.724  28.947  61.723  1.00 54.09           C
ATOM   4056  CB  SER A 494      22.283  27.547  62.009  1.00 54.32           C
ATOM   4057  OG  SER A 494      22.713  26.926  60.803  1.00 54.46           O
ATOM   4058  C   SER A 494      22.806  29.783  61.028  1.00 55.58           C
ATOM   4059  O   SER A 494      23.959  29.334  60.933  1.00 56.23           O
ATOM   4060  N   PHE A 495      22.462  30.989  60.560  1.00 56.84           N
ATOM   4061  CA  PHE A 495      23.443  31.825  59.836  1.00 57.84           C
ATOM   4062  CB  PHE A 495      23.190  31.748  58.321  1.00 58.22           C
ATOM   4063  CG  PHE A 495      23.912  30.622  57.647  1.00 58.96           C
ATOM   4064  CD1 PHE A 495      23.278  29.400  57.428  1.00 59.38           C
ATOM   4065  CE1 PHE A 495      23.957  28.345  56.808  1.00 60.02           C
ATOM   4066  CZ  PHE A 495      25.289  28.513  56.413  1.00 60.05           C
ATOM   4067  CE2 PHE A 495      25.927  29.728  56.625  1.00 60.69           C
ATOM   4068  CD2 PHE A 495      25.239  30.775  57.246  1.00 59.92           C
ATOM   4069  C   PHE A 495      23.602  33.299  60.279  1.00 58.09           C
ATOM   4070  O   PHE A 495      23.309  34.212  59.507  1.00 58.56           O
ATOM   4071  N   ALA A 496      24.068  33.548  61.503  1.00 58.21           N
ATOM   4072  CA  ALA A 496      24.280  32.526  62.521  1.00 57.85           C
ATOM   4073  CB  ALA A 496      25.589  32.774  63.272  1.00 57.96           C
ATOM   4074  C   ALA A 496      23.084  32.637  63.453  1.00 57.43           C
ATOM   4075  O   ALA A 496      22.236  31.737  63.513  1.00 57.62           O
ATOM   4076  N   GLU A 497      23.017  33.768  64.151  1.00 56.31           N
ATOM   4077  CA  GLU A 497      21.891  34.120  64.997  1.00 55.34           C
ATOM   4078  CB  GLU A 497      22.397  34.572  66.366  1.00 55.66           C
ATOM   4079  CG  GLU A 497      21.365  34.472  67.479  1.00 57.47           C
ATOM   4080  CD  GLU A 497      21.952  33.880  68.747  1.00 59.51           C
ATOM   4081  OE1 GLU A 497      22.167  34.639  69.721  1.00 60.59           O
ATOM   4082  OE2 GLU A 497      22.210  32.653  68.760  1.00 60.30           O
ATOM   4083  C   GLU A 497      21.124  35.242  64.319  1.00 53.83           C
ATOM   4084  O   GLU A 497      20.057  35.652  64.779  1.00 54.01           O
ATOM   4085  N   ASP A 498      21.668  35.714  63.201  1.00 52.24           N
ATOM   4086  CA  ASP A 498      21.109  36.853  62.472  1.00 50.44           C
ATOM   4087  CB  ASP A 498      21.970  37.200  61.242  1.00 50.85           C
ATOM   4088  CG  ASP A 498      23.456  37.333  61.558  1.00 51.89           C
ATOM   4089  OD1 ASP A 498      23.818  37.872  62.624  1.00 53.83           O
ATOM   4090  OD2 ASP A 498      24.342  36.939  60.769  1.00 52.54           O
ATOM   4091  C   ASP A 498      19.646  36.706  62.013  1.00 48.56           C
ATOM   4092  O   ASP A 498      19.051  37.719  61.647  1.00 48.47           O
ATOM   4093  N   TYR A 499      19.065  35.489  62.071  1.00 46.12           N
ATOM   4094  CA  TYR A 499      17.799  35.170  61.356  1.00 43.79           C
ATOM   4095  CB  TYR A 499      18.155  34.560  59.988  1.00 43.34           C
ATOM   4096  CG  TYR A 499      18.941  35.394  59.025  1.00 42.67           C
ATOM   4097  CD1 TYR A 499      18.388  36.526  58.436  1.00 41.25           C
ATOM   4098  CE1 TYR A 499      19.116  37.280  57.522  1.00 42.43           C
ATOM   4099  CZ  TYR A 499      20.403  36.882  57.180  1.00 42.68           C
ATOM   4100  OH  TYR A 499      21.131  37.618  56.280  1.00 43.88           O
ATOM   4101  CE2 TYR A 499      20.966  35.756  57.748  1.00 42.07           C
ATOM   4102  CD2 TYR A 499      20.230  35.009  58.651  1.00 42.98           C
ATOM   4103  C   TYR A 499      16.704  34.186  61.866  1.00 42.16           C
ATOM   4104  O   TYR A 499      15.744  33.992  61.138  1.00 43.16           O
ATOM   4105  N   GLY A 500      16.721  33.584  63.053  1.00 40.78           N
ATOM   4106  CA  GLY A 500      17.030  34.165  64.329  1.00 37.74           C
ATOM   4107  C   GLY A 500      15.616  34.431  64.860  1.00 35.38           C
ATOM   4108  O   GLY A 500      14.925  33.557  65.390  1.00 34.41           O
ATOM   4109  N   ASP A 501      15.166  35.646  64.601  1.00 32.76           N
ATOM   4110  CA  ASP A 501      13.958  36.191  65.168  1.00 30.09           C
ATOM   4111  CB  ASP A 501      14.216  37.688  65.318  1.00 30.35           C
ATOM   4112  CG  ASP A 501      13.062  38.422  65.911  1.00 30.56           C
ATOM   4113  OD1 ASP A 501      11.996  37.802  66.103  1.00 27.16           O
ATOM   4114  OD2 ASP A 501      13.156  39.630  66.207  1.00 34.05           O
ATOM   4115  C   ASP A 501      12.747  35.912  64.278  1.00 28.68           C
ATOM   4116  O   ASP A 501      12.589  36.527  63.224  1.00 27.49           O
ATOM   4117  N   HIS A 502      11.878  34.991  64.703  1.00 27.26           N
ATOM   4118  CA  HIS A 502      10.696  34.634  63.919  1.00 26.14           C
ATOM   4119  CB  HIS A 502      10.032  33.370  64.490  1.00 28.01           C
ATOM   4120  CG  HIS A 502       9.208  33.629  65.712  1.00 30.04           C
ATOM   4121  ND1 HIS A 502       9.771  33.851  66.950  1.00 32.50           N
ATOM   4122  CE1 HIS A 502       8.809  34.080  67.829  1.00 32.95           C
ATOM   4123  NE2 HIS A 502       7.646  34.025  67.200  1.00 32.77           N
ATOM   4124  CD2 HIS A 502       7.868  33.741  65.875  1.00 31.38           C
ATOM   4125  C   HIS A 502       9.674  35.760  63.753  1.00 25.20           C
ATOM   4126  O   HIS A 502       8.730  35.639  62.954  1.00 23.89           O
ATOM   4127  N   LYS A 503       9.836  36.864  64.502  1.00 23.85           N
ATOM   4128  CA  LYS A 503       8.926  37.998  64.294  1.00 23.69           C
ATOM   4129  CB  LYS A 503       8.883  38.933  65.503  1.00 24.37           C
ATOM   4130  CG  LYS A 503       8.346  38.254  66.774  1.00 27.73           C
ATOM   4131  CD  LYS A 503       6.854  38.118  66.690  1.00 32.72           C
ATOM   4132  CE  LYS A 503       6.271  37.903  68.095  1.00 35.89           C
ATOM   4133  NZ  LYS A 503       7.121  36.946  68.862  1.00 37.81           N
ATOM   4134  C   LYS A 503       9.312  38.787  63.057  1.00 22.89           C
ATOM   4135  O   LYS A 503       8.517  39.604  62.567  1.00 22.20           O
ATOM   4136  N   VAL A 504      10.527  38.534  62.543  1.00 22.97           N
ATOM   4137  CA  VAL A 504      10.910  39.189  61.307  1.00 22.85           C
ATOM   4138  CB  VAL A 504      11.910  40.410  61.474  1.00 24.34           C
ATOM   4139  CG1 VAL A 504      12.298  40.760  62.947  1.00 23.95           C
ATOM   4140  CG2 VAL A 504      13.027  40.494  60.386  1.00 24.06           C
ATOM   4141  C   VAL A 504      11.191  38.227  60.140  1.00 21.88           C
ATOM   4142  O   VAL A 504      10.621  38.404  59.088  1.00 21.92           O
ATOM   4143  N   PHE A 505      11.960  37.172  60.381  1.00 21.54           N
ATOM   4144  CA  PHE A 505      12.304  36.228  59.307  1.00 21.11           C
ATOM   4145  CB  PHE A 505      13.808  35.999  59.284  1.00 20.26           C
ATOM   4146  CG  PHE A 505      14.619  37.261  59.210  1.00 21.73           C
ATOM   4147  CD1 PHE A 505      14.711  37.965  58.002  1.00 21.98           C
ATOM   4148  CE1 PHE A 505      15.497  39.133  57.921  1.00 19.69           C
ATOM   4149  CZ  PHE A 505      16.188  39.597  59.037  1.00 21.36           C
ATOM   4150  CE2 PHE A 505      16.109  38.911  60.267  1.00 21.89           C
ATOM   4151  CD2 PHE A 505      15.316  37.726  60.338  1.00 23.71           C
ATOM   4152  C   PHE A 505      11.667  34.857  59.454  1.00 21.55           C
ATOM   4153  O   PHE A 505      11.782  34.233  60.506  1.00 22.32           O
ATOM   4154  N   ASN A 506      11.048  34.388  58.375  1.00 22.25           N
ATOM   4155  CA  ASN A 506      10.534  33.010  58.306  1.00 21.91           C
ATOM   4156  CB  ASN A 506       9.040  32.995  58.562  1.00 21.37           C
ATOM   4157  CG  ASN A 506       8.756  33.308  60.025  1.00 19.97           C
ATOM   4158  OD1 ASN A 506       8.871  32.440  60.891  1.00 22.28           O
ATOM   4159  ND2 ASN A 506       8.546  34.572  60.313  1.00 17.85           N
ATOM   4160  C   ASN A 506      10.911  32.274  57.034  1.00 22.17           C
ATOM   4161  O   ASN A 506      11.260  32.885  56.039  1.00 19.87           O
ATOM   4162  N   LEU A 507      10.801  30.950  57.088  1.00 23.34           N
ATOM   4163  CA  LEU A 507      11.024  30.126  55.891  1.00 23.81           C
ATOM   4164  CB  LEU A 507      12.466  29.641  55.902  1.00 24.13           C
ATOM   4165  CG  LEU A 507      12.913  28.577  54.878  1.00 23.67           C
ATOM   4166  CD1 LEU A 507      12.936  29.135  53.474  1.00 25.65           C
ATOM   4167  CD2 LEU A 507      14.256  28.135  55.316  1.00 22.19           C
ATOM   4168  C   LEU A 507      10.069  28.950  55.916  1.00 24.39           C
ATOM   4169  O   LEU A 507       9.950  28.267  56.932  1.00 24.59           O
ATOM   4170  N   ALA A 508       9.349  28.765  54.820  1.00 24.76           N
ATOM   4171  CA  ALA A 508       8.398  27.674  54.701  1.00 26.03           C
ATOM   4172  CB  ALA A 508       6.976  28.206  54.708  1.00 26.54           C
ATOM   4173  C   ALA A 508       8.635  26.891  53.429  1.00 26.50           C
ATOM   4174  O   ALA A 508       8.888  27.469  52.370  1.00 25.93           O
ATOM   4175  N   LEU A 509       8.525  25.575  53.532  1.00 27.62           N
ATOM   4176  CA  LEU A 509       8.528  24.698  52.353  1.00 28.34           C
ATOM   4177  CB  LEU A 509       9.574  23.599  52.513  1.00 28.27           C
ATOM   4178  CG  LEU A 509      11.036  23.882  52.168  1.00 28.28           C
ATOM   4179  CD1 LEU A 509      11.651  24.968  53.039  1.00 26.64           C
ATOM   4180  CD2 LEU A 509      11.823  22.595  52.330  1.00 27.82           C
ATOM   4181  C   LEU A 509       7.142  24.076  52.170  1.00 29.76           C
ATOM   4182  O   LEU A 509       6.515  23.625  53.148  1.00 30.21           O
ATOM   4183  N   ARG A 510       6.641  24.099  50.943  1.00 29.45           N
ATOM   4184  CA  ARG A 510       5.301  23.614  50.646  1.00 31.18           C
ATOM   4185  CB  ARG A 510       4.387  24.796  50.334  1.00 31.72           C
ATOM   4186  CG  ARG A 510       2.967  24.407  49.985  1.00 35.08           C
ATOM   4187  CD  ARG A 510       2.193  25.493  49.252  1.00 40.99           C
ATOM   4188  NE  ARG A 510       1.734  26.564  50.132  1.00 45.94           N
ATOM   4189  CZ  ARG A 510       0.528  26.604  50.704  1.00 48.06           C
ATOM   4190  NH1 ARG A 510       0.194  27.634  51.474  1.00 48.48           N
ATOM   4191  NH2 ARG A 510      -0.347  25.618  50.507  1.00 48.92           N
ATOM   4192  C   ARG A 510       5.340  22.670  49.441  1.00 31.04           C
ATOM   4193  O   ARG A 510       5.835  23.045  48.385  1.00 30.41           O
ATOM   4194  N   PHE A 511       4.816  21.454  49.602  1.00 31.64           N
ATOM   4195  CA  PHE A 511       4.603  20.537  48.463  1.00 31.89           C
ATOM   4196  CB  PHE A 511       4.454  19.121  48.973  1.00 32.46           C
ATOM   4197  CG  PHE A 511       4.442  18.071  47.894  1.00 33.99           C
ATOM   4198  CD1 PHE A 511       5.630  17.436  47.518  1.00 34.32           C
ATOM   4199  CE1 PHE A 511       5.623  16.447  46.529  1.00 34.20           C
ATOM   4200  CZ  PHE A 511       4.421  16.076  45.917  1.00 34.07           C
ATOM   4201  CE2 PHE A 511       3.241  16.704  46.276  1.00 34.46           C
ATOM   4202  CD2 PHE A 511       3.253  17.697  47.275  1.00 33.54           C
ATOM   4203  C   PHE A 511       3.331  20.952  47.714  1.00 32.67           C
ATOM   4204  O   PHE A 511       2.261  21.039  48.320  1.00 33.10           O
ATOM   4205  N   VAL A 512       3.444  21.235  46.412  1.00 32.33           N
ATOM   4206  CA AVAL A 512       2.300  21.706  45.630  0.50 32.58           C
ATOM   4207  CA BVAL A 512       2.327  21.744  45.603  0.50 32.69           C
ATOM   4208  CB AVAL A 512       2.320  23.270  45.390  0.50 32.82           C
ATOM   4209  CB BVAL A 512       2.560  23.229  45.173  0.50 33.01           C
ATOM   4210  CG1AVAL A 512       3.539  23.722  44.579  0.50 32.59           C
ATOM   4211  CG1BVAL A 512       1.298  23.846  44.566  0.50 33.58           C
ATOM   4212  CG2AVAL A 512       1.030  23.754  44.723  0.50 33.45           C
ATOM   4213  CG2BVAL A 512       3.068  24.068  46.329  0.50 33.21           C
ATOM   4214  C   VAL A 512       2.158  20.924  44.326  1.00 33.20           C
ATOM   4215  O   VAL A 512       3.126  20.700  43.607  1.00 31.40           O
ATOM   4216  N   LYS A 513       0.927  20.493  44.040  1.00 34.19           N
ATOM   4217  CA  LYS A 513       0.623  19.820  42.768  1.00 35.36           C
ATOM   4218  CB  LYS A 513      -0.638  18.923  42.894  1.00 35.60           C
ATOM   4219  CG  LYS A 513      -0.432  17.669  43.771  1.00 36.73           C
ATOM   4220  CD  LYS A 513      -1.748  16.981  44.263  1.00 37.37           C
ATOM   4221  CE  LYS A 513      -2.493  17.821  45.344  1.00 39.82           C
ATOM   4222  NZ  LYS A 513      -3.416  17.044  46.270  1.00 39.94           N
ATOM   4223  C   LYS A 513       0.487  20.879  41.669  1.00 34.94           C
ATOM   4224  O   LYS A 513       0.103  22.033  41.939  1.00 34.49           O
ATOM   4225  N   GLY A 514       0.841  20.502  40.436  1.00 35.34           N
ATOM   4226  CA  GLY A 514       0.825  21.420  39.288  1.00 36.33           C
ATOM   4227  C   GLY A 514      -0.392  22.322  39.140  1.00 37.14           C
ATOM   4228  O   GLY A 514      -0.267  23.525  38.852  1.00 36.34           O
ATOM   4229  N   TYR A 515      -1.579  21.753  39.332  1.00 38.41           N
ATOM   4230  CA  TYR A 515      -2.807  22.545  39.158  1.00 39.49           C
ATOM   4231  CB  TYR A 515      -4.030  21.664  38.868  1.00 41.49           C
ATOM   4232  CG  TYR A 515      -4.148  20.450  39.739  1.00 43.65           C
ATOM   4233  CD1 TYR A 515      -3.779  19.187  39.260  1.00 46.42           C
ATOM   4234  CE1 TYR A 515      -3.890  18.052  40.069  1.00 47.78           C
ATOM   4235  CZ  TYR A 515      -4.383  18.183  41.365  1.00 47.09           C
ATOM   4236  OH  TYR A 515      -4.504  17.067  42.172  1.00 47.35           O
ATOM   4237  CE2 TYR A 515      -4.750  19.424  41.856  1.00 46.95           C
ATOM   4238  CD2 TYR A 515      -4.633  20.550  41.043  1.00 46.41           C
ATOM   4239  C   TYR A 515      -3.092  23.563  40.264  1.00 38.43           C
ATOM   4240  O   TYR A 515      -3.934  24.438  40.075  1.00 38.10           O
ATOM   4241  N   ASP A 516      -2.390  23.459  41.394  1.00 37.80           N
ATOM   4242  CA AASP A 516      -2.543  24.444  42.477  0.50 37.57           C
ATOM   4243  CA BASP A 516      -2.536  24.403  42.506  0.50 37.46           C
ATOM   4244  CB AASP A 516      -2.755  23.764  43.832  0.50 37.60           C
ATOM   4245  CB BASP A 516      -2.680  23.641  43.843  0.50 37.32           C
ATOM   4246  CG AASP A 516      -3.189  24.743  44.910  0.50 37.42           C
ATOM   4247  CG BASP A 516      -3.833  22.603  43.835  0.50 36.93           C
ATOM   4248  OD1AASP A 516      -2.784  24.559  46.077  0.50 37.70           O
ATOM   4249  OD1BASP A 516      -4.897  22.860  43.234  0.50 35.62           O
ATOM   4250  OD2AASP A 516      -3.913  25.741  44.677  0.50 37.48           O
ATOM   4251  OD2BASP A 516      -3.766  21.497  44.413  0.50 34.71           O
ATOM   4252  C   ASP A 516      -1.386  25.445  42.567  1.00 37.61           C
ATOM   4253  O   ASP A 516      -1.211  26.139  43.583  1.00 37.15           O
ATOM   4254  N   LEU A 517      -0.596  25.551  41.493  1.00 37.08           N
ATOM   4255  CA  LEU A 517       0.520  26.505  41.477  1.00 37.19           C
ATOM   4256  CB  LEU A 517       1.428  26.285  40.252  1.00 36.53           C
ATOM   4257  CG  LEU A 517       2.428  25.135  40.277  1.00 34.04           C
ATOM   4258  CD1 LEU A 517       2.883  24.772  38.860  1.00 32.25           C
ATOM   4259  CD2 LEU A 517       3.605  25.524  41.141  1.00 32.18           C
ATOM   4260  C   LEU A 517       0.008  27.944  41.475  1.00 38.19           C
ATOM   4261  O   LEU A 517      -0.987  28.244  40.811  1.00 38.08           O
ATOM   4262  N   PRO A 518       0.680  28.835  42.196  1.00 39.14           N
ATOM   4263  CA  PRO A 518       0.346  30.266  42.151  1.00 40.22           C
ATOM   4264  CB  PRO A 518       1.504  30.915  42.909  1.00 40.00           C
ATOM   4265  CG  PRO A 518       1.947  29.877  43.851  1.00 39.70           C
ATOM   4266  CD  PRO A 518       1.767  28.556  43.150  1.00 39.43           C
ATOM   4267  C   PRO A 518       0.244  30.831  40.721  1.00 41.25           C
ATOM   4268  O   PRO A 518       0.952  30.376  39.804  1.00 41.32           O
ATOM   4269  N   ASP A 519      -0.666  31.791  40.544  1.00 41.79           N
ATOM   4270  CA  ASP A 519      -0.820  32.566  39.303  1.00 42.30           C
ATOM   4271  CB  ASP A 519      -1.879  33.658  39.499  1.00 42.99           C
ATOM   4272  CG  ASP A 519      -3.270  33.201  39.126  1.00 46.08           C
ATOM   4273  OD1 ASP A 519      -3.397  32.181  38.414  1.00 49.21           O
ATOM   4274  OD2 ASP A 519      -4.295  33.821  39.488  1.00 49.51           O
ATOM   4275  C   ASP A 519       0.462  33.254  38.851  1.00 41.23           C
ATOM   4276  O   ASP A 519       0.709  33.341  37.655  1.00 41.35           O
ATOM   4277  N   GLU A 520       1.232  33.748  39.830  1.00 41.03           N
ATOM   4278  CA AGLU A 520       2.514  34.424  39.611  0.50 40.93           C
ATOM   4279  CA BGLU A 520       2.534  34.398  39.631  0.50 41.02           C
ATOM   4280  CB AGLU A 520       3.267  34.593  40.953  0.50 40.95           C
ATOM   4281  CB BGLU A 520       3.312  34.380  40.951  0.50 40.94           C
ATOM   4282  CG AGLU A 520       3.815  33.300  41.575  0.50 40.55           C
ATOM   4283  CG BGLU A 520       3.266  35.653  41.771  0.50 40.37           C
ATOM   4284  CD AGLU A 520       4.535  33.495  42.910  0.50 40.32           C
ATOM   4285  CD BGLU A 520       4.425  35.746  42.758  0.50 38.79           C
ATOM   4286  OE1AGLU A 520       4.659  34.652  43.368  0.50 39.60           O
ATOM   4287  OE1BGLU A 520       4.563  34.856  43.628  0.50 38.54           O
ATOM   4288  OE2AGLU A 520       4.990  32.482  43.511  0.50 38.14           O
ATOM   4289  OE2BGLU A 520       5.209  36.711  42.660  0.50 36.99           O
ATOM   4290  C   GLU A 520       3.410  33.716  38.582  1.00 41.07           C
ATOM   4291  O   GLU A 520       4.121  34.364  37.808  1.00 40.90           O
ATOM   4292  N   VAL A 521       3.347  32.396  38.591  1.00 41.64           N
ATOM   4293  CA  VAL A 521       4.222  31.487  37.876  1.00 42.27           C
ATOM   4294  CB  VAL A 521       4.117  30.138  38.644  1.00 42.65           C
ATOM   4295  CG1 VAL A 521       3.736  28.967  37.778  1.00 42.84           C
ATOM   4296  CG2 VAL A 521       5.314  29.907  39.560  1.00 42.17           C
ATOM   4297  C   VAL A 521       3.897  31.359  36.369  1.00 42.94           C
ATOM   4298  O   VAL A 521       4.697  30.836  35.584  1.00 42.11           O
ATOM   4299  N   PHE A 522       2.723  31.841  35.973  1.00 43.85           N
ATOM   4300  CA  PHE A 522       2.273  31.752  34.585  1.00 45.23           C
ATOM   4301  CB  PHE A 522       0.898  31.076  34.504  1.00 44.28           C
ATOM   4302  CG  PHE A 522       0.858  29.710  35.130  1.00 42.87           C
ATOM   4303  CD1 PHE A 522       0.300  29.527  36.397  1.00 41.27           C
ATOM   4304  CE1 PHE A 522       0.267  28.263  36.988  1.00 39.55           C
ATOM   4305  CZ  PHE A 522       0.795  27.171  36.313  1.00 40.74           C
ATOM   4306  CE2 PHE A 522       1.353  27.339  35.038  1.00 39.76           C
ATOM   4307  CD2 PHE A 522       1.381  28.598  34.457  1.00 41.41           C
ATOM   4308  C   PHE A 522       2.219  33.145  33.990  1.00 47.17           C
ATOM   4309  O   PHE A 522       1.667  34.063  34.610  1.00 46.88           O
ATOM   4310  N   ASP A 523       2.795  33.303  32.797  1.00 49.25           N
ATOM   4311  CA AASP A 523       2.831  34.616  32.147  0.50 50.80           C
ATOM   4312  CA BASP A 523       2.844  34.593  32.102  0.50 50.84           C
ATOM   4313  CB AASP A 523       4.054  34.786  31.215  0.50 50.74           C
ATOM   4314  CB BASP A 523       3.943  34.577  31.037  0.50 50.81           C
ATOM   4315  CG AASP A 523       3.967  33.965  29.926  0.50 50.96           C
ATOM   4316  CG BASP A 523       5.328  34.411  31.630  0.50 51.22           C
ATOM   4317  OD1AASP A 523       2.966  34.074  29.180  0.50 51.10           O
ATOM   4318  OD1BASP A 523       5.727  35.242  32.475  0.50 51.99           O
ATOM   4319  OD2AASP A 523       4.896  33.214  29.550  0.50 50.73           O
ATOM   4320  OD2BASP A 523       6.093  33.482  31.301  0.50 51.32           O
ATOM   4321  C   ASP A 523       1.500  34.959  31.468  1.00 51.76           C
ATOM   4322  O   ASP A 523       0.557  34.170  31.512  1.00 51.72           O
ATOM   4323  N   ALA A 524       1.429  36.151  30.868  1.00 54.04           N
ATOM   4324  CA  ALA A 524       0.196  36.658  30.240  1.00 56.62           C
ATOM   4325  CB  ALA A 524       0.431  38.039  29.624  1.00 56.52           C
ATOM   4326  C   ALA A 524      -0.391  35.706  29.200  1.00 58.35           C
ATOM   4327  O   ALA A 524      -1.597  35.440  29.208  1.00 58.82           O
ATOM   4328  N   ASN A 525       0.471  35.188  28.324  1.00 60.41           N
ATOM   4329  CA  ASN A 525       0.068  34.288  27.238  1.00 62.30           C
ATOM   4330  CB  ASN A 525       1.183  34.201  26.189  1.00 62.67           C
ATOM   4331  CG  ASN A 525       1.874  35.537  25.949  1.00 63.81           C
ATOM   4332  OD1 ASN A 525       1.252  36.510  25.506  1.00 65.10           O
ATOM   4333  ND2 ASN A 525       3.171  35.587  26.239  1.00 64.01           N
ATOM   4334  C   ASN A 525      -0.277  32.873  27.717  1.00 63.43           C
ATOM   4335  O   ASN A 525      -0.930  32.104  27.002  1.00 63.52           O
ATOM   4336  N   GLU A 526       0.166  32.532  28.926  1.00 64.71           N
ATOM   4337  CA  GLU A 526       0.034  31.169  29.439  1.00 65.68           C
ATOM   4338  CB  GLU A 526       1.278  30.788  30.242  1.00 65.40           C
ATOM   4339  CG  GLU A 526       2.538  30.714  29.396  1.00 64.43           C
ATOM   4340  CD  GLU A 526       3.777  30.402  30.210  1.00 62.77           C
ATOM   4341  OE1 GLU A 526       3.843  30.828  31.384  1.00 61.48           O
ATOM   4342  OE2 GLU A 526       4.685  29.738  29.667  1.00 61.55           O
ATOM   4343  C   GLU A 526      -1.214  30.969  30.286  1.00 66.80           C
ATOM   4344  O   GLU A 526      -1.654  31.890  30.983  1.00 66.90           O
ATOM   4345  N   LYS A 527      -1.778  29.764  30.217  1.00 68.11           N
ATOM   4346  CA  LYS A 527      -2.896  29.390  31.080  1.00 69.49           C
ATOM   4347  CB  LYS A 527      -4.205  29.254  30.291  1.00 69.48           C
ATOM   4348  CG  LYS A 527      -5.462  29.259  31.172  1.00 69.46           C
ATOM   4349  CD  LYS A 527      -6.677  29.758  30.405  1.00 69.72           C
ATOM   4350  CE  LYS A 527      -6.535  31.233  30.025  1.00 69.80           C
ATOM   4351  NZ  LYS A 527      -7.106  31.502  28.676  1.00 69.88           N
ATOM   4352  C   LYS A 527      -2.628  28.128  31.896  1.00 70.43           C
ATOM   4353  O   LYS A 527      -2.278  27.074  31.358  1.00 70.50           O
ATOM   4354  N   ARG A 528      -2.813  28.277  33.203  1.00 71.74           N
ATOM   4355  CA  ARG A 528      -2.723  27.216  34.202  1.00 73.06           C
ATOM   4356  CB  ARG A 528      -3.443  27.708  35.463  1.00 72.98           C
ATOM   4357  CG  ARG A 528      -4.127  26.659  36.329  1.00 73.05           C
ATOM   4358  CD  ARG A 528      -4.967  27.261  37.450  1.00 72.74           C
ATOM   4359  NE  ARG A 528      -4.340  28.473  37.980  1.00 71.37           N
ATOM   4360  CZ  ARG A 528      -3.352  28.479  38.867  1.00 70.74           C
ATOM   4361  NH1 ARG A 528      -2.870  27.337  39.348  1.00 70.78           N
ATOM   4362  NH2 ARG A 528      -2.842  29.631  39.276  1.00 69.98           N
ATOM   4363  C   ARG A 528      -3.272  25.853  33.763  1.00 74.25           C
ATOM   4364  O   ARG A 528      -4.318  25.778  33.120  1.00 74.34           O
ATOM   4365  N   PRO A 529      -2.551  24.781  34.093  1.00 75.52           N
ATOM   4366  CA  PRO A 529      -3.099  23.435  34.012  1.00 76.57           C
ATOM   4367  CB  PRO A 529      -1.860  22.586  33.718  1.00 76.51           C
ATOM   4368  CG  PRO A 529      -0.713  23.334  34.369  1.00 76.00           C
ATOM   4369  CD  PRO A 529      -1.146  24.770  34.546  1.00 75.57           C
ATOM   4370  C   PRO A 529      -3.707  23.035  35.368  1.00 77.66           C
ATOM   4371  O   PRO A 529      -3.157  23.414  36.400  1.00 78.05           O
ATOM   4372  N   SER A 530      -4.825  22.311  35.409  1.00 78.79           N
ATOM   4373  CA  SER A 530      -5.668  21.922  34.276  1.00 79.73           C
ATOM   4374  CB  SER A 530      -5.038  20.789  33.451  1.00 79.89           C
ATOM   4375  OG  SER A 530      -4.673  19.688  34.269  1.00 79.72           O
ATOM   4376  C   SER A 530      -6.974  21.454  34.914  1.00 80.29           C
ATOM   4377  O   SER A 530      -8.050  21.962  34.584  1.00 80.34           O
ATOM   4378  N   ALA A 531      -6.846  20.486  35.829  1.00 80.95           N
ATOM   4379  CA  ALA A 531      -7.882  20.099  36.809  1.00 81.59           C
ATOM   4380  CB  ALA A 531      -9.222  19.701  36.138  1.00 81.49           C
ATOM   4381  C   ALA A 531      -7.422  19.019  37.813  1.00 81.99           C
ATOM   4382  O   ALA A 531      -7.652  19.184  39.011  1.00 82.06           O
ATOM   4383  N   ALA A 532      -6.767  17.934  37.373  1.00 82.48           N
ATOM   4384  CA  ALA A 532      -6.302  17.702  35.995  1.00 82.98           C
ATOM   4385  CB  ALA A 532      -5.061  16.791  35.994  1.00 82.94           C
ATOM   4386  C   ALA A 532      -7.378  17.149  35.051  1.00 83.19           C
ATOM   4387  O   ALA A 532      -8.091  16.202  35.400  1.00 83.36           O
ATOM   4388  N   ALA A 533      -7.482  17.757  33.865  1.00 83.33           N
ATOM   4389  CA  ALA A 533      -8.425  17.341  32.818  1.00 83.34           C
ATOM   4390  CB  ALA A 533      -9.829  17.910  33.083  1.00 83.40           C
ATOM   4391  C   ALA A 533      -7.931  17.757  31.431  1.00 83.38           C
ATOM   4392  O   ALA A 533      -7.873  18.944  31.103  1.00 83.29           O
ATOM   4393  MG  MG  B 602      27.609  39.891  34.907  1.00 19.43          MG
ATOM   4394  O2A ATP B 605      27.594  35.977  37.200  1.00 21.78           O
ATOM   4395  PA  ATP B 605      28.396  37.019  36.424  1.00 23.21           P
ATOM   4396  O1A ATP B 605      27.900  38.493  36.436  1.00 22.23           O
ATOM   4397  O3A ATP B 605      28.498  36.483  34.891  1.00 21.02           O
ATOM   4398  PB  ATP B 605      28.793  37.254  33.519  1.00 20.19           P
ATOM   4399  O1B ATP B 605      28.966  38.771  33.747  1.00 18.35           O
ATOM   4400  O2B ATP B 605      29.864  36.470  32.847  1.00 20.35           O
ATOM   4401  O3B ATP B 605      27.407  37.050  32.743  1.00 20.74           O
ATOM   4402  PG  ATP B 605      25.959  37.751  32.937  1.00 20.33           P
ATOM   4403  O3G ATP B 605      25.651  38.351  31.604  1.00 19.75           O
ATOM   4404  O2G ATP B 605      25.032  36.647  33.384  1.00 23.36           O
ATOM   4405  O1G ATP B 605      26.183  38.778  34.043  1.00 21.87           O
ATOM   4406  O5* ATP B 605      29.916  36.940  36.970  1.00 23.70           O
ATOM   4407  C5* ATP B 605      30.890  37.844  36.436  1.00 21.90           C
ATOM   4408  C4* ATP B 605      32.234  37.179  36.348  1.00 22.47           C
ATOM   4409  C3* ATP B 605      32.298  36.010  35.391  1.00 22.99           C
ATOM   4410  O3* ATP B 605      32.274  36.377  34.009  1.00 22.46           O
ATOM   4411  C2* ATP B 605      33.532  35.266  35.882  1.00 24.45           C
ATOM   4412  O2* ATP B 605      34.774  35.832  35.419  1.00 25.88           O
ATOM   4413  C1* ATP B 605      33.374  35.423  37.382  1.00 23.30           C
ATOM   4414  O4* ATP B 605      32.562  36.593  37.607  1.00 23.16           O
ATOM   4415  N9  ATP B 605      32.614  34.243  37.862  1.00 22.15           N
ATOM   4416  C4  ATP B 605      33.117  33.013  37.969  1.00 22.99           C
ATOM   4417  C5  ATP B 605      32.020  32.184  38.487  1.00 23.49           C
ATOM   4418  N7  ATP B 605      30.943  32.960  38.640  1.00 22.90           N
ATOM   4419  C8  ATP B 605      31.319  34.214  38.246  1.00 23.15           C
ATOM   4420  N3  ATP B 605      34.323  32.456  37.726  1.00 23.66           N
ATOM   4421  C2  ATP B 605      34.516  31.120  37.955  1.00 23.33           C
ATOM   4422  N1  ATP B 605      33.540  30.304  38.428  1.00 23.15           N
ATOM   4423  C6  ATP B 605      32.293  30.749  38.696  1.00 23.07           C
ATOM   4424  N6  ATP B 605      31.289  29.995  39.165  1.00 22.94           N
ATOM   4425  P   Ar  X   1      36.506  22.604  54.772  1.00 72.71           P
ATOM   4426  O1P Ar  X   1      37.204  21.440  55.374  1.00 70.99           O
ATOM   4427  O2P Ar  X   1      37.031  23.980  54.976  1.00 73.47           O
ATOM   4428  O5* Ar  X   1      34.973  22.576  55.227  1.00 70.31           O
ATOM   4429  C5* Ar  X   1      34.652  22.696  56.607  1.00 69.16           C
ATOM   4430  C4* Ar  X   1      34.035  24.042  56.955  1.00 67.49           C
ATOM   4431  O4* Ar  X   1      35.021  24.930  57.538  1.00 67.42           O
ATOM   4432  C1* Ar  X   1      34.821  26.236  57.031  1.00 67.05           C
ATOM   4433  N9  Ar  X   1      36.057  27.009  57.229  1.00 66.40           N
ATOM   4434  C8  Ar  X   1      37.192  26.973  56.460  1.00 66.50           C
ATOM   4435  N7  Ar  X   1      38.149  27.769  56.875  1.00 66.32           N
ATOM   4436  C5  Ar  X   1      37.610  28.367  58.003  1.00 66.56           C
ATOM   4437  C4  Ar  X   1      36.319  27.912  58.242  1.00 66.41           C
ATOM   4438  N3  Ar  X   1      35.510  28.289  59.261  1.00 66.63           N
ATOM   4439  C2  Ar  X   1      36.104  29.195  60.055  1.00 66.58           C
ATOM   4440  N1  Ar  X   1      37.341  29.720  59.944  1.00 66.93           N
ATOM   4441  C6  Ar  X   1      38.133  29.320  58.910  1.00 66.81           C
ATOM   4442  N6  Ar  X   1      39.364  29.829  58.778  1.00 66.24           N
ATOM   4443  C2* Ar  X   1      34.342  26.014  55.595  1.00 67.01           C
ATOM   4444  O2* Ar  X   1      33.659  27.148  55.083  1.00 68.29           O
ATOM   4445  C3* Ar  X   1      33.418  24.813  55.798  1.00 66.50           C
ATOM   4446  O3* Ar  X   1      32.091  25.161  56.178  1.00 64.51           O
ATOM   4448  P   Ar  X   2      30.851  24.258  55.689  1.00 64.04           P
ATOM   4449  O1P Ar  X   2      30.656  23.142  56.654  1.00 63.31           O
ATOM   4450  O2P Ar  X   2      29.760  25.215  55.343  1.00 64.45           O
ATOM   4451  O5* Ar  X   2      31.359  23.532  54.341  1.00 60.33           O
ATOM   4452  C5* Ar  X   2      31.412  24.159  53.070  1.00 51.22           C
ATOM   4453  C4* Ar  X   2      30.391  23.562  52.120  1.00 45.62           C
ATOM   4454  O4* Ar  X   2      29.448  22.700  52.809  1.00 41.73           O
ATOM   4455  C1* Ar  X   2      28.140  23.132  52.468  1.00 43.68           C
ATOM   4456  N9  Ar  X   2      27.199  22.770  53.531  1.00 44.51           N
ATOM   4457  C8  Ar  X   2      27.057  23.350  54.768  1.00 45.42           C
ATOM   4458  N7  Ar  X   2      26.122  22.798  55.512  1.00 46.41           N
ATOM   4459  C5  Ar  X   2      25.610  21.781  54.720  1.00 45.13           C
ATOM   4460  C4  Ar  X   2      26.266  21.757  53.474  1.00 47.01           C
ATOM   4461  N3  Ar  X   2      26.033  20.893  52.448  1.00 42.79           N
ATOM   4462  C2  Ar  X   2      25.060  20.031  52.759  1.00 44.61           C
ATOM   4463  N1  Ar  X   2      24.344  19.945  53.896  1.00 42.98           N
ATOM   4464  C6  Ar  X   2      24.586  20.809  54.908  1.00 44.26           C
ATOM   4465  N6  Ar  X   2      23.846  20.693  56.020  1.00 44.46           N
ATOM   4466  C2* Ar  X   2      28.255  24.642  52.233  1.00 41.48           C
ATOM   4467  O2* Ar  X   2      27.184  25.151  51.469  1.00 42.58           O
ATOM   4468  C3* Ar  X   2      29.543  24.640  51.432  1.00 42.39           C
ATOM   4469  O3* Ar  X   2      29.249  24.322  50.063  1.00 36.90           O
ATOM   4470  P   Ar  X   3      30.420  24.385  49.014  1.00 33.77           P
ATOM   4471  O1P Ar  X   3      31.731  24.469  49.735  1.00 34.50           O
ATOM   4472  O2P Ar  X   3      30.207  23.327  48.001  1.00 30.84           O
ATOM   4473  O5* Ar  X   3      30.107  25.811  48.377  1.00 28.68           O
ATOM   4474  C5* Ar  X   3      30.222  27.058  49.042  1.00 24.71           C
ATOM   4475  C4* Ar  X   3      30.521  28.127  47.993  1.00 22.55           C
ATOM   4476  O4* Ar  X   3      31.851  27.912  47.484  1.00 21.30           O
ATOM   4477  C1* Ar  X   3      31.859  27.553  46.100  1.00 21.96           C
ATOM   4478  N9  Ar  X   3      32.894  26.535  45.974  1.00 22.03           N
ATOM   4479  C8  Ar  X   3      33.330  25.712  46.984  1.00 22.66           C
ATOM   4480  N7  Ar  X   3      34.283  24.901  46.631  1.00 23.16           N
ATOM   4481  C5  Ar  X   3      34.492  25.217  45.293  1.00 21.90           C
ATOM   4482  C4  Ar  X   3      33.667  26.244  44.879  1.00 22.86           C
ATOM   4483  N3  Ar  X   3      33.602  26.797  43.636  1.00 21.31           N
ATOM   4484  C2  Ar  X   3      34.510  26.258  42.824  1.00 20.57           C
ATOM   4485  N1  Ar  X   3      35.390  25.278  43.100  1.00 23.10           N
ATOM   4486  C6  Ar  X   3      35.406  24.718  44.344  1.00 23.97           C
ATOM   4487  N6  Ar  X   3      36.279  23.727  44.636  1.00 23.75           N
ATOM   4488  C2* Ar  X   3      30.425  27.150  45.757  1.00 21.28           C
ATOM   4489  O2* Ar  X   3      30.127  27.311  44.351  1.00 19.70           O
ATOM   4490  C3* Ar  X   3      29.675  28.092  46.715  1.00 20.52           C
ATOM   4491  O3* Ar  X   3      29.593  29.422  46.197  1.00 19.21           O
ATOM   4492  P   Ar  X   4      28.703  30.568  46.840  1.00 22.92           P
ATOM   4493  O1P Ar  X   4      29.630  31.533  47.471  1.00 22.87           O
ATOM   4494  O2P Ar  X   4      27.656  29.956  47.673  1.00 21.80           O
ATOM   4495  O5* Ar  X   4      28.096  31.288  45.543  1.00 21.25           O
ATOM   4496  C5* Ar  X   4      26.973  30.850  44.750  1.00 20.42           C
ATOM   4497  C4* Ar  X   4      26.099  32.075  44.569  1.00 19.35           C
ATOM   4498  O4* Ar  X   4      25.522  32.277  45.895  1.00 21.15           O
ATOM   4499  C1* Ar  X   4      25.611  33.631  46.267  1.00 22.58           C
ATOM   4500  N9  Ar  X   4      25.561  33.708  47.725  1.00 23.47           N
ATOM   4501  C8  Ar  X   4      26.256  32.950  48.620  1.00 25.57           C
ATOM   4502  N7  Ar  X   4      25.983  33.245  49.880  1.00 24.47           N
ATOM   4503  C5  Ar  X   4      25.045  34.254  49.784  1.00 24.16           C
ATOM   4504  C4  Ar  X   4      24.763  34.544  48.476  1.00 23.97           C
ATOM   4505  N3  Ar  X   4      23.905  35.477  48.021  1.00 26.03           N
ATOM   4506  C2  Ar  X   4      23.302  36.137  49.015  1.00 25.85           C
ATOM   4507  N1  Ar  X   4      23.474  35.948  50.328  1.00 25.36           N
ATOM   4508  C6  Ar  X   4      24.343  35.013  50.764  1.00 24.85           C
ATOM   4509  N6  Ar  X   4      24.526  34.849  52.071  1.00 24.41           N
ATOM   4510  C2* Ar  X   4      26.947  34.073  45.647  1.00 21.04           C
ATOM   4511  O2* Ar  X   4      27.007  35.476  45.637  1.00 18.26           O
ATOM   4512  C3* Ar  X   4      26.806  33.413  44.263  1.00 19.72           C
ATOM   4513  O3* Ar  X   4      25.946  34.134  43.400  1.00 20.47           O
ATOM   4514  P   Ar  X   5      26.301  34.251  41.850  1.00 21.10           P
ATOM   4515  O1P Ar  X   5      26.841  32.951  41.370  1.00 21.15           O
ATOM   4516  O2P Ar  X   5      25.092  34.821  41.237  1.00 18.28           O
ATOM   4517  O5* Ar  X   5      27.550  35.274  41.821  1.00 19.88           O
ATOM   4518  C5* Ar  X   5      27.256  36.644  42.169  1.00 21.02           C
ATOM   4519  C4* Ar  X   5      28.360  37.565  41.691  1.00 18.77           C
ATOM   4520  O4* Ar  X   5      29.580  37.240  42.386  1.00 20.52           O
ATOM   4521  C1* Ar  X   5      30.690  37.432  41.506  1.00 18.40           C
ATOM   4522  N9  Ar  X   5      31.448  36.187  41.427  1.00 18.89           N
ATOM   4523  C8  Ar  X   5      31.001  34.922  41.703  1.00 20.59           C
ATOM   4524  N7  Ar  X   5      31.925  33.995  41.569  1.00 21.36           N
ATOM   4525  C5  Ar  X   5      33.033  34.707  41.153  1.00 20.00           C
ATOM   4526  C4  Ar  X   5      32.747  36.056  41.044  1.00 19.39           C
ATOM   4527  N3  Ar  X   5      33.587  37.046  40.682  1.00 18.44           N
ATOM   4528  C2  Ar  X   5      34.785  36.526  40.414  1.00 19.66           C
ATOM   4529  N1  Ar  X   5      35.197  35.249  40.425  1.00 20.49           N
ATOM   4530  C6  Ar  X   5      34.343  34.288  40.823  1.00 20.86           C
ATOM   4531  N6  Ar  X   5      34.708  32.988  40.857  1.00 19.22           N
ATOM   4532  C2* Ar  X   5      30.152  37.948  40.170  1.00 18.50           C
ATOM   4533  O2* Ar  X   5      30.173  39.381  40.161  1.00 21.70           O
ATOM   4534  C3* Ar  X   5      28.750  37.398  40.213  1.00 21.20           C
ATOM   4535  O3* Ar  X   5      27.812  38.107  39.380  1.00 21.00           O
ATOM   4536  O   HOH W   1      30.635  33.436  45.667  1.00 21.93           O
ATOM   4537  O   HOH W   2      32.242  27.069  40.000  1.00 16.69           O
ATOM   4538  O   HOH W   3      24.204  45.112  24.703  1.00 22.24           O
ATOM   4539  O   HOH W   4      20.100  29.568   4.074  1.00 23.54           O
ATOM   4540  O   HOH W   5      19.353  14.179  30.172  1.00 24.81           O
ATOM   4541  O   HOH W   6      29.442  30.454  35.288  1.00 25.60           O
ATOM   4542  O   HOH W   7      43.282  26.227  31.521  1.00 20.26           O
ATOM   4543  O   HOH W   8      11.518   2.966  38.634  1.00 53.24           O
ATOM   4544  O   HOH W   9      34.051  62.904  45.336  1.00 23.08           O
ATOM   4545  O   HOH W  10      29.930  42.920  33.529  1.00 15.86           O
ATOM   4546  O   HOH W  11      17.406  23.396  23.943  1.00 19.31           O
ATOM   4547  O   HOH W  12      29.670  33.891  35.355  1.00 17.39           O
ATOM   4548  O   HOH W  13      23.288  58.710  33.720  1.00 27.72           O
ATOM   4549  O   HOH W  14      19.037  52.081  50.018  1.00 52.15           O
ATOM   4550  O   HOH W  15      24.656  58.061  54.104  1.00 43.76           O
ATOM   4551  O   HOH W  16      21.074  40.488  46.591  1.00 54.17           O
ATOM   4552  O   HOH W  17      24.507  47.723  21.866  1.00 39.16           O
ATOM   4553  O   HOH W  18      24.839  43.561  12.669  1.00 48.80           O
ATOM   4554  O   HOH W  19      20.050  39.557  27.943  1.00 39.55           O
ATOM   4555  O   HOH W  20      15.188  45.991  26.894  1.00 46.37           O
ATOM   4556  O   HOH W  21       6.929  27.564  25.009  1.00 47.17           O
ATOM   4557  O   HOH W  22       8.735  34.054  25.593  1.00 46.11           O
ATOM   4558  O   HOH W  23       4.441  10.176  40.275  1.00 53.38           O
ATOM   4559  O   HOH W  24       7.241  20.001  52.876  1.00 45.66           O
ATOM   4560  O   HOH W  25       2.442  16.899  33.964  1.00 54.53           O
ATOM   4561  O   HOH W  26      42.442  30.304  13.274  1.00 43.35           O
ATOM   4562  O   HOH W  27      48.349  67.731  51.523  1.00 44.53           O
ATOM   4563  O   HOH W  28      29.855  66.783  50.761  1.00 39.47           O
ATOM   4564  O   HOH W  29      47.422  20.526  19.624  1.00 46.53           O
ATOM   4565  O   HOH W  30      39.609  18.421  26.297  1.00 40.44           O
ATOM   4566  O   HOH W  31      44.837  18.752  32.039  1.00 43.90           O
ATOM   4567  O   HOH W  32      43.050  18.037  33.621  1.00 46.81           O
ATOM   4568  O   HOH W  33      25.985  13.042  39.586  1.00 41.55           O
ATOM   4569  O   HOH W  34      31.190   9.811  36.294  1.00 44.08           O
ATOM   4570  O   HOH W  35      19.355  30.764  64.278  1.00 49.59           O
ATOM   4571  O   HOH W  36      17.830  43.412  67.642  1.00 33.56           O
ATOM   4572  O   HOH W  37      15.977  39.459  69.576  1.00 43.85           O
ATOM   4573  O   HOH W  38      18.894  41.642  69.281  1.00 43.44           O
ATOM   4574  O   HOH W  39      13.131  37.392  73.635  1.00 51.51           O
ATOM   4575  O   HOH W  40      11.273  38.480  68.654  1.00 46.27           O
ATOM   4576  O   HOH W  41      52.885  46.092  40.572  1.00 49.60           O
ATOM   4577  O   HOH W  42      54.447  45.105  49.997  1.00 52.48           O
ATOM   4578  O   HOH W  43      44.112  42.513  28.805  1.00 40.41           O
ATOM   4579  O   HOH W  44      29.563  45.167  23.190  1.00 43.82           O
ATOM   4580  O   HOH W  45      33.766  44.720  23.496  1.00 43.64           O
ATOM   4581  O   HOH W  46      14.814  48.282  39.097  1.00 50.19           O
ATOM   4582  O   HOH W  47      26.003  25.724  56.207  1.00 61.91           O
ATOM   4583  O   HOH W  48      38.134  25.940  47.893  1.00 47.98           O
ATOM   4584  O   HOH W  49      25.441  23.251   9.750  1.00 44.70           O
ATOM   4585  O   HOH W  50      21.650  61.015  26.971  1.00 40.85           O
ATOM   4586  O   HOH W  51      48.228  57.311  35.864  1.00 53.46           O
ATOM   4587  O   HOH W  52      31.061  64.133  51.703  1.00 41.72           O
ATOM   4588  O   HOH W  53      24.225  66.069  46.781  1.00 43.47           O
ATOM   4589  O   HOH W  54      20.652  43.646  41.296  1.00 44.44           O
ATOM   4590  O   HOH W  55      11.273  36.348  14.245  1.00 42.67           O
ATOM   4591  O   HOH W  56      -3.353  21.894  48.947  1.00 55.57           O
ATOM   4592  O   HOH W  57      -9.364  26.090  50.697  1.00 50.34           O
ATOM   4593  O   HOH W  58      -2.263  50.085  52.900  1.00 54.66           O
ATOM   4594  O   HOH W  59      -0.111  36.986  41.410  1.00 54.68           O
ATOM   4595  O   HOH W  60      23.900  38.729  41.534  1.00 36.64           O
ATOM   4596  O   HOH W  61       1.980  37.576  44.478  1.00 42.00           O
ATOM   4597  O   HOH W  62     -10.722  30.406  45.906  1.00 41.89           O
ATOM   4598  O   HOH W  63      -8.963  28.713  42.869  1.00 54.58           O
ATOM   4599  O   HOH W  64      16.631  49.065  20.693  1.00 39.58           O
ATOM   4600  O   HOH W  65      35.842  19.573  50.812  1.00 48.98           O
ATOM   4601  O   HOH W  66      38.204  16.043  50.798  1.00 37.07           O
ATOM   4602  O   HOH W  67      13.525  37.223  40.775  1.00 44.44           O
ATOM   4603  O   HOH W  68      15.819  37.452  39.396  1.00 51.37           O
ATOM   4604  O   HOH W  69      42.371  40.399  22.982  1.00 44.03           O
ATOM   4605  O   HOH W  70      44.281  40.621  26.527  1.00 43.02           O
ATOM   4606  O   HOH W  71      43.164  46.226  32.058  1.00 40.46           O
ATOM   4607  O   HOH W  72       0.483  20.187  35.099  1.00 53.31           O
ATOM   4608  O   HOH W  73      17.468   8.514  42.911  1.00 41.60           O
ATOM   4609  O   HOH W  74      19.911  10.146  51.415  1.00 42.39           O
ATOM   4610  O   HOH W  75       5.284  46.649  64.100  1.00 48.08           O
ATOM   4611  O   HOH W  76      14.079  39.887  71.891  1.00 43.46           O
ATOM   4612  O   HOH W  77      22.757  11.590  28.866  1.00 40.90           O
ATOM   4613  O   HOH W  78      27.077  25.621  58.646  1.00 57.33           O
ATOM   4614  O   HOH W  79      41.291  24.022  24.129  1.00 16.37           O
ATOM   4615  O   HOH W  80      31.961  15.609  21.558  1.00 17.59           O
ATOM   4616  O   HOH W  81      37.461  24.788  41.327  1.00 23.52           O
ATOM   4617  O   HOH W  82      30.949  32.036  43.243  1.00 28.48           O
ATOM   4618  O   HOH W  83      41.047  31.439  36.805  1.00 20.29           O
ATOM   4619  O   HOH W  84      29.307  26.519  39.935  1.00 17.85           O
ATOM   4620  O   HOH W  85      26.447  55.046  24.218  1.00 30.55           O
ATOM   4621  O   HOH W  86      40.791  26.738  30.396  1.00 17.97           O
ATOM   4622  O   HOH W  87      29.844  60.722  46.686  1.00 23.80           O
ATOM   4623  O   HOH W  88      37.717  48.413  33.154  1.00 28.15           O
ATOM   4624  O   HOH W  89      30.063  58.804  48.757  1.00 24.77           O
ATOM   4625  O   HOH W  90      29.823  13.992  41.483  1.00 34.12           O
ATOM   4626  O   HOH W  91      19.827  52.312  31.991  1.00 23.26           O
ATOM   4627  O   HOH W  92      24.537  28.625  45.421  1.00 23.74           O
ATOM   4628  O   HOH W  93      39.634  26.660  45.780  1.00 58.76           O
ATOM   4629  O   HOH W  94      28.855  35.369  29.169  1.00 19.63           O
ATOM   4630  O   HOH W  95      24.817  59.721  37.583  1.00 21.58           O
ATOM   4631  O   HOH W  96      29.869  34.464  11.393  1.00 16.40           O
ATOM   4632  O   HOH W  97      24.725  61.493  39.560  1.00 25.17           O
ATOM   4633  O   HOH W  98      19.562  26.766   4.131  1.00 34.40           O
ATOM   4634  O   HOH W  99      23.640  32.908  39.641  1.00 20.53           O
ATOM   4635  O   HOH W 100      29.807  35.911  45.145  1.00 23.76           O
ATOM   4636  O   HOH W 101      13.678  24.061  29.358  1.00 26.71           O
ATOM   4637  O   HOH W 102      34.292  13.532  25.291  1.00 29.44           O
ATOM   4638  O   HOH W 103      35.041  31.357  13.165  1.00 25.19           O
ATOM   4639  O   HOH W 104      19.684  37.697  25.921  1.00 31.32           O
ATOM   4640  O   HOH W 105      23.664  56.154  34.804  1.00 18.92           O
ATOM   4641  O   HOH W 106      35.477  54.966  35.080  1.00 20.05           O
ATOM   4642  O   HOH W 107      18.642  44.183  20.469  1.00 22.28           O
ATOM   4643  O   HOH W 108       6.153  28.126  50.279  1.00 28.86           O
ATOM   4644  O   HOH W 109      23.739  39.848  34.850  1.00 21.21           O
ATOM   4645  O   HOH W 110      15.365  25.318  35.483  1.00 22.70           O
ATOM   4646  O   HOH W 111      42.045  26.686  41.609  1.00 26.61           O
ATOM   4647  O   HOH W 112      30.208  27.662   8.811  1.00 21.76           O
ATOM   4648  O   HOH W 113      29.686  29.651  42.883  1.00 19.58           O
ATOM   4649  O   HOH W 114      26.074  46.409  23.356  1.00 24.83           O
ATOM   4650  O   HOH W 115      36.095  32.436  17.283  1.00 17.61           O
ATOM   4651  O   HOH W 116      37.807  60.130  44.274  1.00 24.19           O
ATOM   4652  O   HOH W 117      21.133  27.502  45.411  1.00 20.80           O
ATOM   4653  O   HOH W 118      30.957  20.392  37.175  1.00 20.36           O
ATOM   4654  O   HOH W 119      38.324  32.561   8.052  1.00 41.39           O
ATOM   4655  O   HOH W 120      27.937  17.530  11.595  1.00 32.36           O
ATOM   4656  O   HOH W 121      17.535  30.664  33.458  1.00 26.15           O
ATOM   4657  O   HOH W 122      34.972  47.169  29.855  1.00 25.65           O
ATOM   4658  O   HOH W 123      18.592  13.341  39.289  1.00 26.18           O
ATOM   4659  O   HOH W 124      28.523  41.528  20.565  1.00 23.48           O
ATOM   4660  O   HOH W 125      25.234  22.233  43.947  1.00 20.34           O
ATOM   4661  O   HOH W 126      19.488  13.938  27.450  1.00 33.36           O
ATOM   4662  O   HOH W 127      39.737  52.429  36.784  1.00 20.89           O
ATOM   4663  O   HOH W 128      53.258  49.977  44.831  1.00 39.63           O
ATOM   4664  O   HOH W 129      21.336  45.982  35.312  1.00 22.86           O
ATOM   4665  O   HOH W 130      25.544  24.949   3.149  1.00 28.77           O
ATOM   4666  O   HOH W 131       6.168  35.692  45.651  1.00 31.70           O
ATOM   4667  O   HOH W 132      41.516  23.354  20.113  1.00 29.52           O
ATOM   4668  O   HOH W 133      38.797  20.824  26.301  1.00 18.16           O
ATOM   4669  O   HOH W 134      14.755  20.324  29.784  1.00 32.97           O
ATOM   4670  O   HOH W 135      25.054  50.356  22.831  1.00 27.47           O
ATOM   4671  O   HOH W 136      24.356  57.025  37.498  1.00 20.67           O
ATOM   4672  O   HOH W 137      38.636  18.918  23.876  1.00 30.93           O
ATOM   4673  O   HOH W 138      32.240  28.584  42.170  1.00 19.48           O
ATOM   4674  O   HOH W 139      35.689  16.044  37.873  1.00 21.29           O
ATOM   4675  O   HOH W 140      28.635  45.905  54.026  1.00 28.12           O
ATOM   4676  O   HOH W 141      41.950  40.161  25.674  1.00 27.61           O
ATOM   4677  O   HOH W 142      23.417  38.544  26.278  1.00 26.44           O
ATOM   4678  O   HOH W 143      34.843  30.886  51.494  1.00 56.34           O
ATOM   4679  O   HOH W 144      50.198  41.420  44.933  1.00 38.37           O
ATOM   4680  O   HOH W 145      41.705  22.324  43.113  1.00 23.48           O
ATOM   4681  O   HOH W 146      15.814  36.554  11.647  1.00 28.94           O
ATOM   4682  O   HOH W 147      21.724  37.172   4.291  1.00 26.31           O
ATOM   4683  O   HOH W 148       9.144  16.862  32.392  1.00 40.17           O
ATOM   4684  O   HOH W 149      27.511  48.339  24.864  1.00 23.45           O
ATOM   4685  O   HOH W 150      40.378  49.585  34.353  1.00 28.29           O
ATOM   4686  O   HOH W 151      23.730  14.809  44.513  1.00 39.27           O
ATOM   4687  O   HOH W 152      31.529  61.951  55.009  1.00 49.86           O
ATOM   4688  O   HOH W 153      31.204  46.117  26.073  1.00 27.01           O
ATOM   4689  O   HOH W 154      40.230  32.140  39.451  1.00 34.39           O
ATOM   4690  O   HOH W 155      21.202  25.223   5.336  1.00 31.15           O
ATOM   4691  O   HOH W 156      36.091  15.738  25.298  1.00 27.97           O
ATOM   4692  O   HOH W 157      21.737  50.713  31.262  1.00 23.30           O
ATOM   4693  O   HOH W 158      46.521  27.304  36.375  1.00 20.35           O
ATOM   4694  O   HOH W 159      36.020  25.916  10.645  1.00 18.90           O
ATOM   4695  O   HOH W 160      28.783  36.209  13.330  1.00 16.01           O
ATOM   4696  O   HOH W 161      35.501  30.242  15.695  1.00 21.56           O
ATOM   4697  O   HOH W 162      27.137  13.943  26.993  1.00 28.32           O
ATOM   4698  O   HOH W 163      25.444  36.454   3.943  1.00 21.78           O
ATOM   4699  O   HOH W 164       1.279  44.478  65.931  1.00 35.34           O
ATOM   4700  O   HOH W 165      21.953  37.620  24.201  1.00 20.24           O
ATOM   4701  O   HOH W 166      25.966  34.609  35.254  1.00 16.80           O
ATOM   4702  O   HOH W 167      11.951  23.296  32.225  1.00 24.78           O
ATOM   4703  O   HOH W 168      29.334  19.418  39.577  1.00 22.43           O
ATOM   4704  O   HOH W 169      13.249  33.420  13.793  1.00 24.00           O
ATOM   4705  O   HOH W 170      37.026  26.141  29.645  1.00 24.84           O
ATOM   4706  O   HOH W 171       6.431  27.331  32.534  1.00 25.25           O
ATOM   4707  O   HOH W 172      37.757  62.079  51.125  1.00 28.13           O
ATOM   4708  O   HOH W 173       6.506  30.542  57.837  1.00 19.60           O
ATOM   4709  O   HOH W 174      30.867  36.855  30.345  1.00 21.03           O
ATOM   4710  O   HOH W 175      37.543  34.449  39.109  1.00 29.72           O
ATOM   4711  O   HOH W 176      15.884  16.576  24.707  1.00 27.05           O
ATOM   4712  O   HOH W 177      10.123  40.461  47.701  1.00 31.75           O
ATOM   4713  O   HOH W 178      17.073  53.166  26.055  1.00 26.06           O
ATOM   4714  O   HOH W 179      35.239  37.914  13.866  1.00 38.61           O
ATOM   4715  O   HOH W 180      27.399  58.374  29.762  1.00 20.57           O
ATOM   4716  O   HOH W 181      28.972  59.654  31.615  1.00 20.84           O
ATOM   4717  O   HOH W 182      44.880  17.554  18.126  1.00 23.38           O
ATOM   4718  O   HOH W 183      12.836  29.210  41.553  1.00 27.83           O
ATOM   4719  O   HOH W 184      15.650  27.548   8.530  1.00 27.45           O
ATOM   4720  O   HOH W 185      24.476  32.884  36.900  1.00 18.61           O
ATOM   4721  O   HOH W 186      47.131  33.100  33.490  1.00 20.74           O
ATOM   4722  O   HOH W 187      43.502  41.401  32.558  1.00 28.85           O
ATOM   4723  O   HOH W 188      21.102  54.963  34.713  1.00 24.19           O
ATOM   4724  O   HOH W 189      11.172  23.510  29.440  1.00 22.27           O
ATOM   4725  O   HOH W 190      28.647  32.205  37.196  1.00 29.11           O
ATOM   4726  O   HOH W 191      33.596  36.546  31.164  1.00 31.73           O
ATOM   4727  O   HOH W 192      20.988  48.311  30.114  1.00 32.15           O
ATOM   4728  O   HOH W 193      39.057  16.944  28.507  1.00 26.33           O
ATOM   4729  O   HOH W 194       8.816  31.897  23.873  1.00 36.13           O
ATOM   4730  O   HOH W 195      18.394  47.986  49.877  1.00 28.95           O
ATOM   4731  O   HOH W 196      25.379  27.541   0.097  1.00 22.23           O
ATOM   4732  O   HOH W 197      16.794  47.765  25.460  1.00 25.65           O
ATOM   4733  O   HOH W 198      25.625  10.204  18.104  1.00 33.17           O
ATOM   4734  O   HOH W 199       4.337  29.656  56.204  1.00 30.31           O
ATOM   4735  O   HOH W 200      26.730  56.435  54.447  1.00 30.02           O
ATOM   4736  O   HOH W 201      36.317  26.145   3.184  1.00 28.31           O
ATOM   4737  O   HOH W 202      19.563  55.150  22.946  1.00 29.48           O
ATOM   4738  O   HOH W 203      18.737  52.328  34.570  1.00 29.65           O
ATOM   4739  O   HOH W 204      50.424  49.868  52.566  1.00 37.94           O
ATOM   4740  O   HOH W 205      30.736  24.965   5.901  1.00 20.89           O
ATOM   4741  O   HOH W 206       8.814  47.559  55.528  1.00 28.83           O
ATOM   4742  O   HOH W 207       8.248  24.558  56.395  1.00 34.93           O
ATOM   4743  O   HOH W 208      32.360  13.634  38.359  1.00 31.10           O
ATOM   4744  O   HOH W 209      19.782  36.352   5.899  1.00 21.37           O
ATOM   4745  O   HOH W 210      25.672  19.038  11.631  1.00 27.08           O
ATOM   4746  O   HOH W 211      28.514  28.026  36.532  1.00 27.36           O
ATOM   4747  O   HOH W 212      51.269  55.966  49.236  1.00 39.22           O
ATOM   4748  O   HOH W 213      35.066  37.931  33.662  1.00 26.17           O
ATOM   4749  O   HOH W 214      36.408  34.133  36.423  1.00 23.71           O
ATOM   4750  O   HOH W 215      17.579  32.693   7.115  1.00 31.03           O
ATOM   4751  O   HOH W 216       6.289  15.010  38.103  1.00 29.78           O
ATOM   4752  O   HOH W 217      41.034  14.602  48.487  1.00 28.69           O
ATOM   4753  O   HOH W 218      26.919  25.675  38.198  1.00 27.87           O
ATOM   4754  O   HOH W 219      33.078  51.167  29.682  1.00 28.62           O
ATOM   4755  O   HOH W 220      49.257  27.488  29.500  1.00 35.64           O
ATOM   4756  O   HOH W 221      35.316  43.024  24.736  1.00 25.38           O
ATOM   4757  O   HOH W 222      40.337  31.595  12.140  1.00 40.04           O
ATOM   4758  O   HOH W 223      19.553  12.739  50.923  1.00 33.79           O
ATOM   4759  O   HOH W 224      36.973  15.423  35.448  1.00 27.35           O
ATOM   4760  O   HOH W 225      14.369  24.229  32.587  1.00 30.26           O
ATOM   4761  O   HOH W 226      47.919  20.272  40.789  1.00 36.85           O
ATOM   4762  O   HOH W 227      12.882  16.208  33.540  1.00 26.93           O
ATOM   4763  O   HOH W 228      20.182  52.767  20.318  1.00 34.77           O
ATOM   4764  O   HOH W 229      16.176  28.450   5.880  1.00 27.10           O
ATOM   4765  O   HOH W 230      22.303  37.930  28.641  1.00 33.94           O
ATOM   4766  O   HOH W 231      29.554  13.596  34.811  1.00 21.19           O
ATOM   4767  O   HOH W 232       8.509  30.433  18.047  1.00 51.14           O
ATOM   4768  O   HOH W 233      34.890  39.147  53.364  1.00 39.55           O
ATOM   4769  O   HOH W 234      33.424  30.991  42.075  1.00 33.96           O
ATOM   4770  O   HOH W 235       2.546  21.414  36.213  1.00 30.34           O
ATOM   4771  O   HOH W 236      44.530  44.179  33.016  1.00 35.93           O
ATOM   4772  O   HOH W 237      33.935  32.811  10.005  1.00 32.26           O
ATOM   4773  O   HOH W 238      21.720  38.905  49.485  1.00 36.79           O
ATOM   4774  O   HOH W 239      24.213  14.612  19.486  1.00 42.13           O
ATOM   4775  O   HOH W 240      46.314  28.238  33.687  1.00 28.75           O
ATOM   4776  O   HOH W 241      -1.642  37.326  46.703  1.00 43.94           O
ATOM   4777  O   HOH W 242      16.622  13.498  31.854  1.00 47.11           O
ATOM   4778  O   HOH W 243      38.428  15.263  26.415  1.00 31.14           O
ATOM   4779  O   HOH W 244      24.004  43.271  41.689  1.00 28.12           O
ATOM   4780  O   HOH W 245      27.161  36.979  53.802  1.00 31.50           O
ATOM   4781  O   HOH W 246      50.808  53.768  50.462  1.00 39.05           O
ATOM   4782  O   HOH W 247      10.458  23.716  17.851  1.00 35.45           O
ATOM   4783  O   HOH W 248      41.699  30.948  40.633  1.00 43.19           O
ATOM   4784  O   HOH W 249      32.524  60.874  46.559  1.00 36.89           O
ATOM   4785  O   HOH W 250      22.845  37.395  52.557  1.00 33.91           O
ATOM   4786  O   HOH W 251      50.751  47.884  35.039  1.00 48.93           O
ATOM   4787  O   HOH W 252      11.130  44.440  61.479  1.00 38.51           O
ATOM   4788  O   HOH W 253      21.561  59.189  51.131  1.00 49.68           O
ATOM   4789  O   HOH W 254       5.752  27.307  27.450  1.00 57.39           O
ATOM   4790  O   HOH W 255      41.796  36.045  19.772  1.00 31.50           O
ATOM   4791  O   HOH W 256       8.351  29.018  32.871  1.00 39.75           O
ATOM   4792  O   HOH W 257       5.982  40.300  63.405  1.00 29.55           O
ATOM   4793  O   HOH W 258      38.926  18.118  47.777  1.00 27.43           O
ATOM   4794  O   HOH W 259      28.006  20.672  43.767  1.00 43.53           O
ATOM   4795  O   HOH W 260      37.005  42.040  18.712  1.00 34.79           O
ATOM   4796  O   HOH W 261       5.657  35.584  62.641  1.00 33.13           O
ATOM   4797  O   HOH W 262      27.016  33.689  38.576  1.00 32.28           O
ATOM   4798  O   HOH W 263      33.788  31.462   6.969  1.00 31.66           O
ATOM   4799  O   HOH W 264      20.256  58.229  38.889  1.00 28.35           O
ATOM   4800  O   HOH W 265      17.407  11.613  41.359  1.00 32.65           O
ATOM   4801  O   HOH W 266      19.366  47.129  33.622  1.00 39.55           O
ATOM   4802  O   HOH W 267      10.263  29.882  59.836  1.00 30.53           O
ATOM   4803  O   HOH W 268      39.894  20.509   8.947  1.00 35.73           O
ATOM   4804  O   HOH W 269      32.907  57.448  54.371  1.00 52.30           O
ATOM   4805  O   HOH W 270      13.309  11.742  53.776  1.00 34.17           O
ATOM   4806  O   HOH W 271       4.966  33.322  26.900  1.00 54.69           O
ATOM   4807  O   HOH W 272       0.046  52.901  55.135  1.00 34.24           O
ATOM   4808  O   HOH W 273      40.721  39.591  21.074  1.00 43.41           O
ATOM   4809  O   HOH W 274      -1.230  20.824  45.754  1.00 34.67           O
ATOM   4810  O   HOH W 275      24.693  34.436   2.102  1.00 29.06           O
ATOM   4811  O   HOH W 276      31.880  20.765   6.495  1.00 24.90           O
ATOM   4812  O   HOH W 277       6.038  12.278  39.148  1.00 42.63           O
ATOM   4813  O   HOH W 278       4.981  29.433  33.104  1.00 40.16           O
ATOM   4814  O   HOH W 279      39.363  41.938  56.358  1.00 40.14           O
ATOM   4815  O   HOH W 280      16.438  42.718  43.648  1.00 54.02           O
ATOM   4816  O   HOH W 281      39.765  58.733  56.652  1.00 41.66           O
ATOM   4817  O   HOH W 282      51.282  23.729  31.207  1.00 54.73           O
ATOM   4818  O   HOH W 283      23.776  17.063  12.346  1.00 31.07           O
ATOM   4819  O   HOH W 284      26.048  28.104  48.518  1.00 30.13           O
ATOM   4820  O   HOH W 285      29.568  18.848   7.424  1.00 30.99           O
ATOM   4821  O   HOH W 286      29.830  62.764  50.099  1.00 43.54           O
ATOM   4822  O   HOH W 287      11.698  31.582  62.290  1.00 30.86           O
ATOM   4823  O   HOH W 288      30.306  19.482  42.316  1.00 34.27           O
ATOM   4824  O   HOH W 289       4.484  38.240  63.792  1.00 31.64           O
ATOM   4825  O   HOH W 290      36.371  12.818  37.715  1.00 33.25           O
ATOM   4826  O   HOH W 291      45.072  64.837  50.582  1.00 49.29           O
ATOM   4827  O   HOH W 292      21.246  12.374  31.002  1.00 34.68           O
ATOM   4828  O   HOH W 293      28.444  51.100  56.185  1.00 36.30           O
ATOM   4829  O   HOH W 294      43.689  29.016  44.286  1.00 32.93           O
ATOM   4830  O   HOH W 295      10.731  36.119  17.478  1.00 46.96           O
ATOM   4831  O   HOH W 296      52.092  43.235  44.105  1.00 42.00           O
ATOM   4832  O   HOH W 297      23.173  38.794  31.068  1.00 25.42           O
ATOM   4833  O   HOH W 298       6.987  46.844  48.454  1.00 31.81           O
ATOM   4834  O   HOH W 299      44.516  17.653  24.522  1.00 29.59           O
ATOM   4835  O   HOH W 300      17.181  48.165  56.707  1.00 35.63           O
ATOM   4836  O   HOH W 301      23.601  58.519  31.087  1.00 34.51           O
ATOM   4837  O   HOH W 302      12.520  49.122  53.299  1.00 32.49           O
ATOM   4838  O   HOH W 303      47.327  56.737  40.064  1.00 40.21           O
ATOM   4839  O   HOH W 304      44.638  35.533  19.850  1.00 43.25           O
ATOM   4840  O   HOH W 305       9.312  42.370  46.386  1.00 37.04           O
ATOM   4841  O   HOH W 306      28.317  58.507  55.661  1.00 40.46           O
ATOM   4842  O   HOH W 307       6.397  37.387  41.152  1.00 45.98           O
ATOM   4843  O   HOH W 308      35.651  45.833  27.457  1.00 28.87           O
ATOM   4844  O   HOH W 309      23.395  36.285  42.868  1.00 31.10           O
ATOM   4845  O   HOH W 310      27.392  12.055  30.690  1.00 42.14           O
ATOM   4846  O   HOH W 311      14.401  34.080  11.143  1.00 35.09           O
ATOM   4847  O   HOH W 312      25.327  36.863  39.291  1.00 32.75           O
ATOM   4848  O   HOH W 313      11.990  43.705  18.657  1.00 38.75           O
ATOM   4849  O   HOH W 314      37.573  38.877  47.234  1.00 31.85           O
ATOM   4850  O   HOH W 315       7.111  51.351  53.989  1.00 36.28           O
ATOM   4851  O   HOH W 316       0.308  34.468  42.401  1.00 52.84           O
ATOM   4852  O   HOH W 317      11.092  31.476  32.326  1.00 44.93           O
ATOM   4853  O   HOH W 318      36.801  10.142  28.298  1.00 42.83           O
ATOM   4854  O   HOH W 319      31.473  33.592   7.396  1.00 31.07           O
ATOM   4855  O   HOH W 320      23.855  18.927  49.937  1.00 45.52           O
ATOM   4856  O   HOH W 321      13.011  13.360  34.996  1.00 44.03           O
ATOM   4857  O   HOH W 322      17.758  56.081  44.255  1.00 45.23           O
ATOM   4858  O   HOH W 323       8.867  55.621  50.088  1.00 48.46           O
ATOM   4859  O   HOH W 324      47.860  65.380  50.073  1.00 41.01           O
ATOM   4860  O   HOH W 325      17.208  54.227  28.832  1.00 39.34           O
ATOM   4861  O   HOH W 326      43.088  27.890  14.041  1.00 45.77           O
ATOM   4862  O   HOH W 327      48.330  15.384  39.988  1.00 43.10           O
ATOM   4863  O   HOH W 328      52.089  49.155  40.392  1.00 48.35           O
ATOM   4864  O   HOH W 329       7.255  13.764  52.304  1.00 40.74           O
ATOM   4865  O   HOH W 330      39.499  23.398   4.999  1.00 38.86           O
ATOM   4866  O   HOH W 331      38.337  41.551  21.142  1.00 39.55           O
ATOM   4867  O   HOH W 332       7.538  52.698  50.159  1.00 46.00           O
ATOM   4868  O   HOH W 333      32.224  32.535   3.987  1.00 39.34           O
ATOM   4869  O   HOH W 334      21.357  55.171  50.707  1.00 34.05           O
ATOM   4870  O   HOH W 335      46.215  29.614  21.759  1.00 57.08           O
ATOM   4871  O   HOH W 336      45.363  19.893  37.126  1.00 38.55           O
ATOM   4872  O   HOH W 337      28.100  21.920  47.805  1.00 37.64           O
ATOM   4873  O   HOH W 338       9.575  26.050  58.439  1.00 41.28           O
ATOM   4874  O   HOH W 339      17.311  35.996   4.930  1.00 38.53           O
ATOM   4875  O   HOH W 340      49.036  64.718  56.485  1.00 40.63           O
ATOM   4876  O   HOH W 341      41.896  26.222  16.186  1.00 44.78           O
ATOM   4877  O   HOH W 342       9.385  27.332  12.144  1.00 42.44           O
ATOM   4878  O   HOH W 343      47.665  25.236  23.446  1.00 46.04           O
ATOM   4879  O   HOH W 344      14.150  37.824  13.200  1.00 42.95           O
ATOM   4880  O   HOH W 345      24.538  41.283  40.088  1.00 33.58           O
ATOM   4881  O   HOH W 346       6.420  43.786  45.571  1.00 39.44           O
ATOM   4882  O   HOH W 347      13.334  45.224  61.186  1.00 33.67           O
ATOM   4883  O   HOH W 348      29.970  10.318  18.867  1.00 31.92           O
ATOM   4884  O   HOH W 349      30.797  50.861  26.826  1.00 32.51           O
ATOM   4885  O   HOH W 350      21.732  40.391   9.930  1.00 40.13           O
ATOM   4886  O   HOH W 351      17.104  37.754  63.463  1.00 41.73           O
ATOM   4887  O   HOH W 352      19.119  41.433  29.011  1.00 38.50           O
ATOM   4888  O   HOH W 353      25.064  10.412  32.637  1.00 51.46           O
ATOM   4889  O   HOH W 354      33.672  20.376  54.587  1.00 52.83           O
ATOM   4890  O   HOH W 355      25.247  29.903  51.346  1.00 38.26           O
ATOM   4891  O   HOH W 356      15.111  22.519   2.122  1.00 52.07           O
ATOM   4892  O   HOH W 357      40.660  34.092  51.164  1.00 35.04           O
ATOM   4893  O   HOH W 358      48.207  32.236  46.586  1.00 40.85           O
ATOM   4894  O   HOH W 359      17.799  55.546  40.588  1.00 40.90           O
ATOM   4895  O   HOH W 360      49.208  55.629  42.766  1.00 39.49           O
ATOM   4896  O   HOH W 361       4.632  25.112  24.791  1.00 50.66           O
ATOM   4897  O   HOH W 362      44.947  38.561  28.722  1.00 53.06           O
ATOM   4898  O   HOH W 363       9.913  48.330  53.273  1.00 44.59           O
ATOM   4899  O   HOH W 364      29.363  10.708  29.990  1.00 36.75           O
ATOM   4900  O   HOH W 365      -0.192  16.746  40.127  1.00 38.61           O
ATOM   4901  O   HOH W 366      13.396  40.864  46.755  1.00 45.17           O
ATOM   4902  O   HOH W 367      45.987  60.237  58.997  1.00 48.23           O
ATOM   4903  O   HOH W 368      51.993  39.427  45.652  1.00 44.94           O
ATOM   4904  O   HOH W 369       7.785  50.168  51.160  1.00 42.65           O
ATOM   4905  O   HOH W 370      34.040  41.817  56.397  1.00 50.59           O
ATOM   4906  O   HOH W 371      51.350  51.160  36.717  1.00 47.65           O
ATOM   4907  O   HOH W 372      32.482  27.293  58.773  1.00 50.43           O
ATOM   4908  O   HOH W 373      10.741  22.119  22.422  1.00 46.75           O
ATOM   4909  O   HOH W 374      51.383  32.361  42.721  1.00 45.18           O
ATOM   4910  O   HOH W 375      15.425  39.089  46.980  1.00 42.24           O
ATOM   4911  O   HOH W 376      39.457  14.326  34.858  1.00 30.28           O
ATOM   4912  O   HOH W 377      21.706  36.041  45.461  1.00 55.34           O
ATOM   4913  O   HOH W 378      39.557  52.035  57.904  1.00 47.07           O
ATOM   4914  O   HOH W 379      18.994  15.812  14.696  1.00 40.69           O
ATOM   4915  O   HOH W 380       8.111  34.825  30.480  1.00 48.76           O
ATOM   4916  O   HOH W 381      21.389  52.926  53.782  1.00 44.97           O
ATOM   4917  O   HOH W 382      16.215  42.477  26.308  1.00 41.06           O
ATOM   4918  O   HOH W 383      19.049  49.885  51.903  1.00 39.92           O
ATOM   4919  O   HOH W 384      17.337  46.639  23.197  1.00 46.68           O
ATOM   4920  O   HOH W 385      14.345  16.795  22.578  1.00 49.61           O
ATOM   4921  O   HOH W 386      12.779   8.902  51.611  1.00 38.82           O
ATOM   4922  O   HOH W 387      17.963  33.448  33.682  1.00 55.66           O
ATOM   4923  O   HOH W 388      41.076  47.370  31.731  1.00 40.32           O
ATOM   4924  O   HOH W 389      19.165  38.821  47.745  1.00 38.21           O
ATOM   4925  O   HOH W 390      22.663  36.627  34.735  1.00 33.40           O
ATOM   4926  O   HOH W 391      30.322  23.119   3.741  1.00 27.50           O
ATOM   4927  O   HOH W 392      23.146  12.810  24.189  1.00 37.92           O
ATOM   4928  O   HOH W 393      13.886  20.285   4.224  1.00 46.90           O
ATOM   4929  O   HOH W 394      33.675  24.826  59.908  1.00 59.94           O
ATOM   4930  O   HOH W 395      40.219  48.014  59.094  1.00 47.96           O
ATOM   4931  O   HOH W 396      45.779  33.449  26.987  1.00 49.81           O
ATOM   4932  O   HOH W 397      11.646   4.288  46.139  1.00 47.07           O
ATOM   4933  O   HOH W 398       0.421  32.727  46.294  1.00 41.90           O
ATOM   4934  O   HOH W 399      18.577  33.666  39.255  1.00 40.83           O
ATOM   4935  O   HOH W 400      27.566  41.327  33.298  1.00 18.71           O
ATOM   4936  O   HOH W 401      18.863  38.413   7.673  1.00 24.71           O
ATOM   4937  O   HOH W 402      16.478  49.061  53.222  1.00 41.30           O
ATOM   4938  O   HOH W 403      30.455  12.427  37.200  1.00 31.58           O
ATOM   4939  O   HOH W 404      38.392  23.029  43.062  1.00 35.06           O
ATOM   4940  O   HOH W 405      21.533  47.996  56.824  1.00 56.62           O
ATOM   4941  O   HOH W 406      19.941  56.317  47.951  1.00 30.61           O
ATOM   4942  O   HOH W 407      48.682  37.479  32.873  1.00 47.49           O
ATOM   4943  O   HOH W 408      23.185  12.641  33.032  1.00 38.07           O
ATOM   4944  O   HOH W 409      41.792  17.279  25.126  1.00 28.48           O
ATOM   4945  O   HOH W 410      52.611  24.552  33.567  1.00 56.90           O
ATOM   4946  O   HOH W 411      10.851  27.843   9.068  1.00 48.14           O
ATOM   4947  O   HOH W 412      -4.451  33.189  58.878  1.00 47.97           O
ATOM   4948  O   HOH W 413      -2.606  27.373  51.535  1.00 57.61           O
ATOM   4949  O   HOH W 414      33.711  64.089  51.674  1.00 39.85           O
ATOM   4950  O   HOH W 415      43.825  21.174  51.328  1.00 42.33           O
ATOM   4951  O   HOH W 416      35.501  40.794  47.306  1.00 26.05           O
ATOM   4952  O   HOH W 417       2.604  38.451  42.584  1.00 43.48           O
ATOM   4953  O   HOH W 418      25.287  23.427   6.941  1.00 37.25           O
ATOM   4954  O   HOH W 419       9.353  10.892  33.761  1.00 42.30           O
ATOM   4955  O   HOH W 420      16.410  17.265  13.846  1.00 42.21           O
ATOM   4956  O   HOH W 421      34.012  23.543  50.163  1.00 47.83           O
ATOM   4957  O   HOH W 422       0.397  22.952  48.905  1.00 43.90           O
ATOM   4958  O   HOH W 423      25.547  60.022  25.819  1.00 38.39           O
ATOM   4959  O   HOH W 424      29.816  10.281  22.477  1.00 40.06           O
ATOM   4960  O   HOH W 425      26.401  32.046  52.548  1.00 51.42           O
ATOM   4961  O   HOH W 426      27.147   8.779  20.954  1.00 39.55           O
ATOM   4962  O   HOH W 427      13.817  56.420  55.062  1.00 36.03           O
ATOM   4963  O   HOH W 428      -5.442  -0.675  52.120  1.00 32.78           O
ATOM   4964  O   HOH W 429      27.781  20.325  49.930  1.00 52.38           O
ATOM   4965  O   HOH W 430      17.020  13.926  25.907  1.00 36.76           O
ATOM   4966  O   HOH W 431      16.780   6.921  49.759  1.00 45.12           O
ATOM   4967  O   HOH W 432      46.859  22.320  43.147  1.00 34.31           O
ATOM   4968  O   HOH W 433      44.845  38.624  31.304  1.00 40.79           O
ATOM   4969  O   HOH W 434      -0.575  50.558  56.951  1.00 41.86           O
ATOM   4970  O   HOH W 435      32.088  34.715   9.808  1.00 30.23           O
ATOM   4971  O   HOH W 436      29.482  40.912  14.576  1.00 40.85           O
ATOM   4972  O   HOH W 437      32.365  38.435  12.345  1.00 35.95           O
ATOM   4973  O   HOH W 438      30.066  38.459  13.515  1.00 29.84           O
ATOM   4974  O   HOH W 439      36.618  38.827  15.237  1.00 37.76           O
ATOM   4975  O   HOH W 440      28.700  41.781  18.016  1.00 58.56           O
ATOM   4976  O   HOH W 441      21.292  34.062  39.019  1.00 33.72           O
ATOM   4977  O   HOH W 442      22.021  34.392  36.147  1.00 27.17           O
ATOM   4978  O   HOH W 443      24.040  37.911  37.385  1.00 39.21           O
ATOM   4979  O   HOH W 444      15.906  55.344  58.879  1.00 30.02           O
ATOM   4980  O   HOH W 445      31.809  20.840   3.845  1.00 29.56           O
ATOM   4981  O   HOH W 446      21.760  12.906  26.649  1.00 36.40           O
ATOM   4982  O   HOH W 447      13.464  19.237  26.231  1.00 48.01           O
ATOM   4983  O   HOH W 448      11.633  32.921  29.652  1.00 50.61           O
ATOM   4984  O   HOH W 449      36.222  51.180  33.782  1.00 36.68           O
ATOM   4985  O   HOH W 450      36.215  57.739  34.695  1.00 17.46           O
ATOM   4986  O   HOH W 451      24.380  61.717  45.974  1.00 29.30           O
ATOM   4987  O   HOH W 452      24.958  62.765  43.520  1.00 36.63           O
ATOM   4988  O   HOH W 453      27.323  22.552   4.128  1.00 47.51           O
ATOM   4989  O   HOH W 454       4.359  42.339  44.950  1.00 35.25           O
ATOM   4990  O   HOH W 455       3.941  40.685  42.663  1.00 44.38           O
[truncated: 6,242 more chars]
